# Supplementary material for: Evidence-Based Annotation of Gene Function in Shewanella oneidensis MR-1 Using Genome-Wide Fitness Profiling across 121 Conditions
Source: PLoS Genet. 2011 Nov 17;7(11):e1002385. doi: 10.1371/journal.pgen.1002385 (PMC3219624; doi:10.1371/journal.pgen.1002385)
Supplement: Table S1 — List of S. oneidensis MR-1 transposon mutants. (XLS) [file pgen.1002385.s009.xls]

## Sheet: MR1_mutant_collection
strainMutantId	Plate96	Plate96_pos	Scaffold	Location	Strand	Identity	HitLength	Identity2	HitLength2	VimssID	Offset	Genestrand	Overlap	Transposon	TagModule	SysName	Name	COG	Description	upPool	dnPool
71571	1	A01	139	4737112	+	0.968	562	NA	NA	203610	1836	-	gene	pRL27	TagModule_0001	SO4539		NA	serine protease, subtilase family (NCBI ptt file)
71572	1	A02	139	743311	-	0.9965	287	NA	NA	199916	450	+	gene	pRL27	TagModule_0003	SO0728		1433	conserved hypothetical protein (NCBI ptt file)
71573	1	A03	139	4353818	+	1	312	NA	NA	NA	NA		between	pRL27	TagModule_0004			NA
71574	1	A04	139	4474247	-	0.9906	740	NA	NA	203374	356	+	gene	pRL27	TagModule_0004	SO4295		2249	NAD(P)H dehydrogenase (quinone) (NCBI ptt file)	YES	YES
71575	1	A05	139	4811086	-	0.9412	203	NA	NA	203687	321	+	gene	pRL27	TagModule_0005	SO4617	dinF	534	DNA-damage-inducible protein F (NCBI ptt file)
71576	1	A06	139	3315206	-	0.9895	379	NA	NA	202286	193	-	gene	pRL27	TagModule_0006	SO3176		438	glycosyl transferase, group 1 family protein (NCBI ptt file)
71577	1	A07	139	606712	+	0.9966	295	NA	NA	199769	620	-	gene	pRL27	TagModule_0008	SO0579		515	serine/threonine protein kinase, putative (NCBI ptt file)	YES
71578	1	A08	139	4463149	+	1	423	NA	NA	203362	550	+	gene	pRL27	TagModule_0009	SO4283		1477	apbE family protein (NCBI ptt file)
71579	1	A10	139	4707055	+	1	418	NA	NA	203587	1430	+	gene	pRL27	TagModule_0010	SO4513		243	formate dehydrogenase, alpha subunit (NCBI ptt file)	YES	YES
71580	1	A11	139	1011432	+	0.9863	655	NA	NA	200165	3	-	gene	pRL27	TagModule_0011	SO0981		NA	sensor histidine kinase (NCBI ptt file)
71581	1	A12	139	30426	+	0.994	329	NA	NA	199221	1330	+	gene	pRL27	TagModule_0012	SO0024	trkH-1	168	potassium uptake protein TrkH (NCBI ptt file)
71582	1	B01	139	3526113	-	0.9986	739	NA	NA	202495	315	+	gene	pRL27	TagModule_0001	SO3387		NA	hypothetical protein (NCBI ptt file)
71583	1	B02	140	41955	-	0.9883	339	NA	NA	203874	405	-	gene	pRL27	TagModule_0003	SOA0050		1566	toxin secretion, membrane fusion protein (NCBI ptt file)
71584	1	B03	139	2223866	-	0.9333	180	NA	NA	201276	535	+	gene	pRL27	TagModule_0004	SO2119		2208	response regulator (NCBI ptt file)
71585	1	B04	140	57169	-	0.9959	729	NA	NA	203893	106	-	gene	pRL27	TagModule_0004	SOA0070		NA	hypothetical protein (NCBI ptt file)
71586	1	B05	140	69306	-	0.9824	566	0.9824	566	NA	NA		between	pRL27	TagModule_0005			NA
71587	1	B06	140	63258	-	0.9962	526	NA	NA	NA	NA		between	pRL27	TagModule_0006			NA
71588	1	B07	139	661646	-	0.9841	748	NA	NA	199821	985	+	gene	pRL27	TagModule_0030	SO0633	mrcB	744	penicillin-binding protein 1B (NCBI ptt file)
71589	1	B08	140	31223	-	0.9685	125	NA	NA	203865	146	+	gene	pRL27	TagModule_0009	SOA0041		2337	transcriptional regulator, PemK family (NCBI ptt file)
71590	1	B10	140	136356	+	0.987	303	NA	NA	NA	NA		between	pRL27	TagModule_0010			NA
71591	1	B11	139	2764736	+	0.9935	611	NA	NA	201768	2012	-	gene	pRL27	TagModule_0011	SO2629	icd	2838	isocitrate dehydrogenase, NADP-dependent (NCBI ptt file)
71592	1	B12	139	417082	+	0.9529	273	NA	NA	NA	NA		between	pRL27	TagModule_0001			NA
71593	1	C01	140	157766	+	0.9556	719	0.9556	719	NA	NA		between	pRL27	TagModule_0001			NA
71594	1	C02	140	136348	-	0.9805	763	NA	NA	NA	NA		between	pRL27	TagModule_0003			NA
71595	1	C03	139	1345035	+	0.9796	294	NA	NA	NA	NA		between	pRL27	TagModule_0004			NA
71596	1	C04	139	4766004	-	0.9932	589	NA	NA	203641	315	-	gene	pRL27	TagModule_0004	SO4571		583	transcriptional regulator, LysR family (NCBI ptt file)
71597	1	C05	139	360480	-	0.9932	293	NA	NA	199548	559	-	gene	pRL27	TagModule_0005	SO0353		NA	TPR domain protein (NCBI ptt file)	YES	YES
71598	1	C06	139	4169427	-	0.937	413	NA	NA	203103	2649	+	gene	pRL27	TagModule_0006	SO4019		NA	hypothetical protein (NCBI ptt file)
71599	1	C07	139	518960	+	0.9008	367	0.9759	249	NA	NA		between	pRL27	TagModule_0030			NA
71600	1	C08	139	844318	+	0.9909	550	NA	NA	200013	1488	-	gene	pRL27	TagModule_0009	SO0827	lldP	1620	L-lactate permease (NCBI ptt file)
71601	1	C09	139	2245901	-	0.9987	743	NA	NA	NA	NA		between	pRL27	TagModule_0036			NA
71602	1	C10	139	4438213	-	0.9812	683	NA	NA	NA	NA		between	pRL27	TagModule_0034			NA
71603	1	C11	140	59493	-	0.9985	656	NA	NA	NA	NA		between	pRL27	TagModule_0011			NA
71604	1	C12	139	1746375	+	0.9942	342	NA	NA	200824	2006	-	gene	pRL27	TagModule_0001	SO1659		NA	decaheme cytochrome c (NCBI ptt file)
71605	1	D02	139	4555392	-	0.9943	524	NA	NA	203437	201	-	gene	pRL27	TagModule_0003	SO4359		NA	outer membrane protein, putative (NCBI ptt file)
71606	1	D03	139	2102864	+	0.991	221	NA	NA	201163	782	+	gene	pRL27	TagModule_0004	SO2002		NA	hypothetical protein (NCBI ptt file)
71607	1	D04	139	4470900	+	0.9955	444	NA	NA	203370	67	-	gene	pRL27	TagModule_0004	SO4291	pstC	573	phosphate ABC transporter, permease protein (NCBI ptt file)
71608	1	D06	140	18892	+	0.9972	718	NA	NA	203847	118	+	gene	pRL27	TagModule_0006	SOA0022	higB	3549	proteic killer active protein (NCBI ptt file)
71609	1	D07	139	4581158	-	0.9805	306	NA	NA	203463	837	+	gene	pRL27	TagModule_0030	SO4385		2304	von Willebrand factor type A domain protein (NCBI ptt file)
71610	1	D08	139	3445597	+	0.9982	554	NA	NA	202408	289	-	gene	pRL27	TagModule_0032	SO3300		NA	cytochrome c (NCBI ptt file)
71611	1	D09	139	3948415	-	0.996	749	NA	NA	202887	208	-	gene	pRL27	TagModule_0036	SO3796		NA	conserved hypothetical protein (NCBI ptt file)
71612	1	D10	140	43858	+	1	138	NA	NA	203875	136	+	gene	pRL27	TagModule_0034	SOA0051		NA	hypothetical protein (NCBI ptt file)
71613	1	D11	139	4196233	-	0.9754	405	NA	NA	203126	414	+	gene	pRL27	TagModule_0011	SO4042		3971	hydratase/decarboxylase family protein (NCBI ptt file)	YES	YES
71614	1	D12	139	1435309	+	0.943	509	NA	NA	200552	1678	+	gene	pRL27	TagModule_0001	SO1377		2268	conserved hypothetical protein (NCBI ptt file)	YES
71615	1	E01	139	394541	+	0.9838	429	NA	NA	199573	86	-	gene	pRL27	TagModule_0001	SO0380	hsdR-1	610	type I restriction-modification system, R subunit (NCBI ptt file)
71616	1	E02	139	602315	-	0.9545	506	NA	NA	199767	2934	+	gene	pRL27	TagModule_0003	SO0577		642	sensory box histidine kinase/response regulator (NCBI ptt file)
71617	1	E03	139	4662979	-	1	739	NA	NA	203549	255	-	gene	pRL27	TagModule_0048	SO4474		NA	hypothetical protein (NCBI ptt file)
71618	1	E04	139	4453512	+	0.9948	383	NA	NA	203353	499	-	gene	pRL27	TagModule_0004	SO4274		1968	undecaprenol kinase, putative (NCBI ptt file)
71619	1	E05	139	1318311	+	0.9987	757	NA	NA	NA	NA		between	pRL27	TagModule_0026			NA
71620	1	E06	140	41793	+	0.998	505	NA	NA	203874	567	-	gene	pRL27	TagModule_0006	SOA0050		1566	toxin secretion, membrane fusion protein (NCBI ptt file)
71621	1	E07	139	2804811	+	0.9751	442	NA	NA	201818	1290	+	gene	pRL27	TagModule_0028	SO2680		4383	conserved hypothetical protein (NCBI ptt file)
71622	1	E08	140	37533	+	0.9646	654	NA	NA	203872	311	-	gene	pRL27	TagModule_0032	SOA0048		1506	prolyl oligopeptidase family protein (NCBI ptt file)
71623	1	E09	139	1065293	-	0.9902	305	NA	NA	200210	144	+	gene	pRL27	TagModule_0035	SO1027		NA	hypothetical protein (NCBI ptt file)
71624	1	E10	139	494731	+	0.9597	471	NA	NA	199662	409	-	gene	pRL27	TagModule_0034	SO0470		NA	hypothetical protein (NCBI ptt file)
71625	1	E11	140	31689	-	0.9827	289	NA	NA	203866	150	+	gene	pRL27	TagModule_0011	SOA0042		NA	hypothetical protein (NCBI ptt file)
71626	1	E12	139	1324399	+	0.9986	736	NA	NA	200453	301	+	gene	pRL27	TagModule_0011	SO1275	gabD	1012	succinate-semialdehyde dehydrogenase (NCBI ptt file)
71627	1	F01	139	2690241	-	0.9772	740	NA	NA	201700	66	+	gene	pRL27	TagModule_0001	SO2560	rnhA	328	ribonuclease HI (NCBI ptt file)
71628	1	F02	139	4660933	-	0.9655	579	NA	NA	203547	257	+	gene	pRL27	TagModule_0003	SO4472	ntrC	2204	nitrogen regulation protein NR(I) (NCBI ptt file)	YES	YES
71629	1	F03	139	1684989	+	0.9972	722	NA	NA	200768	1170	-	gene	pRL27	TagModule_0048	SO1602		3321	multi-domain beta-ketoacyl synthase (NCBI ptt file)
71630	1	F04	139	3662164	-	1	291	NA	NA	202610	430	-	gene	pRL27	TagModule_0004	SO3509	hex	3525	beta-hexosaminidase b precursor (NCBI ptt file)
71631	1	F05	139	912925	-	1	282	NA	NA	NA	NA		between	pRL27	TagModule_0026			NA
71632	1	F06	139	677561	-	1	411	NA	NA	199841	463	+	gene	pRL27	TagModule_0027	SO0653		NA	hypothetical protein (NCBI ptt file)		YES
71633	1	F07	139	2611557	+	0.9505	380	NA	NA	201630	1028	-	gene	pRL27	TagModule_0028	SO2489	zwf	364	glucose-6-phosphate 1-dehydrogenase (NCBI ptt file)	YES
71634	1	F08	139	1882065	+	0.9986	718	NA	NA	200957	64	+	gene	pRL27	TagModule_0032	SO1794	clpP	740	ATP-dependent Clp protease, proteolytic subunit (NCBI ptt file)
71635	1	F09	140	115359	-	0.9899	99	0.9899	99	NA	NA		between	pRL27	TagModule_0035			NA
71636	1	F10	139	4219457	+	0.9765	682	NA	NA	NA	NA		between	pRL27	TagModule_0034			NA
71637	1	F11	139	4263831	-	0.9749	357	NA	NA	203189	477	-	gene	pRL27	TagModule_0011	SO4105	mshA	NA	MSHA pilin protein MshA (NCBI ptt file)
71638	1	F12	139	4463101	+	1	372	NA	NA	203362	502	+	gene	pRL27	TagModule_0011	SO4283		1477	apbE family protein (NCBI ptt file)
71639	1	G01	139	678738	-	0.993	426	NA	NA	199843	208	+	gene	pRL27	TagModule_0001	SO0655		NA	hypothetical protein (NCBI ptt file)		YES
71640	1	G02	139	725239	-	0.9896	670	NA	NA	199895	429	-	gene	pRL27	TagModule_0003	SO0707		NA	hypothetical protein (NCBI ptt file)
71641	1	G03	139	125461	-	1	249	NA	NA	199312	136	+	gene	pRL27	TagModule_0048	SO0115		NA	hypothetical protein (NCBI ptt file)
71642	1	G05	139	4551734	-	0.9757	488	NA	NA	203436	1870	-	gene	pRL27	TagModule_0026	SO4358	dmaA-2	243	anaerobic dimethyl sulfoxide reductase, A subunit (NCBI ptt file)
71643	1	G06	140	45000	-	0.9834	359	0.9834	359	NA	NA		between	pRL27	TagModule_0027			NA
71644	1	G07	139	449640	+	0.907	343	NA	NA	199620	106	+	gene	pRL27	TagModule_0028	SO0428		1752	conserved hypothetical protein (NCBI ptt file)
71645	1	G08	139	3076696	-	0.9832	351	NA	NA	202063	3772	-	gene	pRL27	TagModule_0032	SO2940		4733	prophage LambdaSo, host specificity protein J, putative (NCBI ptt file)
71646	1	G09	139	4277857	-	1	567	NA	NA	203201	690	-	gene	pRL27	TagModule_0035	SO4118		281	malate oxidoreductase, putative (NCBI ptt file)
71647	1	G10	139	502598	+	0.9958	720	NA	NA	NA	NA		between	pRL27	TagModule_0033			NA
71648	1	G11	139	1133576	+	0.9908	649	NA	NA	200275	242	-	gene	pRL27	TagModule_0011	SO1094		NA	hypothetical Transcription elongation factor (NCBI ptt file)
71649	1	H01	139	3317567	-	0.9565	46	NA	NA	202289	867	-	gene	pRL27	TagModule_0001	SO3179		NA	lipopolysaccharide biosynthesis polymerase, putative (NCBI ptt file)
71650	1	H02	139	2884304	-	0.9845	321	NA	NA	201897	487	+	gene	pRL27	TagModule_0047	SO2761	purN	299	phosphoribosylglycinamide formyltransferase (NCBI ptt file)	YES	YES
71651	1	H03	139	4872295	+	0.9977	428	NA	NA	203743	888	-	gene	pRL27	TagModule_0048	SO4674	kbl	156	2-amino-3-ketobutyrate coenzyme A ligase (NCBI ptt file)
71652	1	H04	139	4463701	-	0.9892	275	NA	NA	NA	NA		between	pRL27	TagModule_0004			NA
71653	1	H05	139	4532757	+	0.9562	249	NA	NA	203419	139	+	gene	pRL27	TagModule_0026	SO4341		NA	hypothetical protein (NCBI ptt file)
71654	1	H06	140	43634	-	1	314	NA	NA	NA	NA		between	pRL27	TagModule_0027			NA
71655	1	H08	139	687897	-	0.9864	367	NA	NA	199856	1124	+	gene	pRL27	TagModule_0031	SO0668		2369	prophage MuSo1, F protein, putative (NCBI ptt file)
71656	1	H09	140	152050	+	0.9584	775	NA	NA	NA	NA		between	pRL27	TagModule_0035			NA
71657	1	H10	139	4765659	-	0.9277	249	NA	NA	203641	660	-	gene	pRL27	TagModule_0033	SO4571		583	transcriptional regulator, LysR family (NCBI ptt file)
78248	2	A01	140	103362	+	0.9919	494	0.9919	494	NA	NA		between	pRL27	TagModule_0013			NA
78249	2	A02	139	4216255	+	0.9749	514	NA	NA	203146	1485	-	gene	pRL27	TagModule_0045	SO4062	psrA	243	polysulfide reductase, subunit A (NCBI ptt file)
78250	2	A03	139	201407	+	0.9836	485	NA	NA	199388	492	+	gene	pRL27	TagModule_0015	SO0191	cysQ-1	1218	cysQ protein (NCBI ptt file)
78251	2	A04	140	81811	-	0.9821	835	0.9809	835	NA	NA		between	pRL27	TagModule_0016			NA
78252	2	A06	139	3207354	-	0.9778	838	NA	NA	202201	2319	+	gene	pRL27	TagModule_0018	SO3084		5001	sensory box protein (NCBI ptt file)
78253	2	A08	139	679297	+	0.9983	587	1	259	NA	NA		between	pRL27	TagModule_0020			NA
78254	2	A09	139	2843098	+	0.9752	281	NA	NA	NA	NA		between	pRL27	TagModule_0021			NA
78255	2	A11	140	40390	+	1	85	NA	NA	203873	723	-	gene	pRL27	TagModule_0023	SOA0049		2274	toxin secretion ABC transporter, ATP-binding subunit/permease protein, putative (NCBI ptt file)
78256	2	A12	139	1972923	-	0.9895	191	NA	NA	201038	341	+	gene	pRL27	TagModule_0024	SO1876		583	NodD transcription activator-related protein (NCBI ptt file)
78257	2	B01	139	3947437	+	0.9834	661	NA	NA	202885	2252	+	gene	pRL27	TagModule_0013	SO3794		2849	conserved domain protein (NCBI ptt file)
78258	2	B02	140	35481	+	0.9665	505	NA	NA	203871	281	-	gene	pRL27	TagModule_0045	SO_A0047		NA	hypothetical protein (NCBI)
78259	2	B03	139	4656665	+	0.993	428	NA	NA	NA	NA		between	pRL27	TagModule_0015			NA
78260	2	B04	139	4582261	+	0.9668	752	0.9458	498	NA	NA		between	pRL27	TagModule_0016			NA
78261	2	B05	139	906445	+	1	689	NA	NA	200062	833	+	gene	pRL27	TagModule_0017	SO0876	pepB	260	peptidase B (NCBI ptt file)
78262	2	B06	139	3393178	+	0.9819	820	NA	NA	202365	460	-	gene	pRL27	TagModule_0018	SO3257		NA	conserved hypothetical protein (NCBI ptt file)
78263	2	B07	139	1133990	-	1	304	NA	NA	NA	NA		between	pRL27	TagModule_0019			NA
78264	2	B08	139	4740435	-	0.9535	558	NA	NA	203614	85	+	gene	pRL27	TagModule_0020	SO4543		NA	hypothetical protein (NCBI ptt file)
78265	2	B09	140	60353	-	1	576	NA	NA	203899	628	-	gene	pRL27	TagModule_0021	SOA0077		1961	site-specific recombinase, resolvase family (NCBI ptt file)
78266	2	B11	140	36071	+	0.9894	750	NA	NA	203872	1773	-	gene	pRL27	TagModule_0023	SOA0048		1506	prolyl oligopeptidase family protein (NCBI ptt file)
78267	2	B12	140	65294	-	0.9897	480	NA	NA	2200888	275	-	gene	pRL27	TagModule_0024	SO_A0180		NA	hypothetical protein (NCBI)
78268	2	C01	139	148794	-	0.9328	521	NA	NA	199338	1045	-	gene	pRL27	TagModule_0043	SO0141		5001	sensory box protein (NCBI ptt file)
78269	2	C02	139	3381352	+	0.9652	598	NA	NA	202349	761	-	gene	pRL27	TagModule_0045	SO3241	flgJ	1705	flagellar protein FlgJ (NCBI ptt file)	YES	YES
78270	2	C03	139	3667208	+	0.9839	248	NA	NA	202615	2511	-	gene	pRL27	TagModule_0015	SO3514		1629	hypothetical TonB-dependent receptor (NCBI ptt file)
78271	2	C04	140	66686	+	0.9952	622	NA	NA	203905	439	-	gene	pRL27	TagModule_0016	SOA0086		1961	site-specific recombinase, resolvase family (NCBI ptt file)
78272	2	C05	139	879370	-	1	456	NA	NA	200042	518	-	gene	pRL27	TagModule_0017	SO0856		3127	conserved hypothetical protein (NCBI ptt file)	YES
78273	2	C06	139	4323431	-	0.9985	653	NA	NA	203232	13830	+	gene	pRL27	TagModule_0018	SO4149		NA	RTX toxin, putative (NCBI ptt file)
78274	2	C07	139	4262350	-	0.9983	582	NA	NA	203186	229	-	gene	pRL27	TagModule_0019	SO4102	mshO	NA	MSHA biogenesis protein MshO (NCBI ptt file)	YES	YES
78275	2	C08	139	140501	+	1	80	NA	NA	199328	139	-	gene	pRL27	TagModule_0020	SO0131		3161	hypothetical chorismate pyruvate lyase (NCBI ptt file)	YES	YES
78276	2	C09	140	136356	+	1	216	NA	NA	NA	NA		between	pRL27	TagModule_0021			NA
78277	2	C10	139	3389963	+	0.9893	464	NA	NA	202360	735	-	gene	pRL27	TagModule_0022	SO3252	cheV-3	835	chemotaxis protein CheV (NCBI ptt file)	YES	YES
78278	2	C11	139	2055264	-	0.9921	377	NA	NA	201110	3248	+	gene	pRL27	TagModule_0023	SO1949		NA	invasin domain protein (NCBI ptt file)
78279	2	C12	140	21077	-	0.995	592	0.995	592	NA	NA		between	pRL27	TagModule_0024			NA
78280	2	D01	140	88482	-	0.9911	449	NA	NA	NA	NA		between	pRL27	TagModule_0043			NA
78281	2	D02	139	1817268	+	0.9639	796	NA	NA	200897	65	-	gene	pRL27	TagModule_0045	SO1733		NA	hypothetical protein (NCBI ptt file)
78282	2	D03	139	2440956	-	0.9864	586	NA	NA	NA	NA		between	pRL27	TagModule_0015			NA
78283	2	D04	139	3667252	+	0.9691	486	NA	NA	202615	2467	-	gene	pRL27	TagModule_0016	SO3514		1629	hypothetical TonB-dependent receptor (NCBI ptt file)
78284	2	D05	139	100986	-	0.982	111	NA	NA	199290	1208	-	gene	pRL27	TagModule_0017	SO0093		1972	NupC family protein (NCBI ptt file)
78285	2	D06	139	3759426	+	1	441	NA	NA	202694	130	+	gene	pRL27	TagModule_0018	SO3597		NA	conserved hypothetical protein (NCBI ptt file)	YES	YES
78286	2	D07	139	4465438	-	0.9681	94	NA	NA	NA	NA		between	pRL27	TagModule_0019			NA
78287	2	D08	139	3225244	-	0.9554	685	NA	NA	202215	150	+	gene	pRL27	TagModule_0020	SO3099		2067	long-chain fatty acid transport protein, putative (NCBI ptt file)
78288	2	D09	139	494825	+	0.9872	469	NA	NA	199662	315	-	gene	pRL27	TagModule_0021	SO0470		NA	hypothetical protein (NCBI ptt file)
78289	2	D10	139	3456229	-	0.9854	947	NA	NA	202414	2480	-	gene	pRL27	TagModule_0022	SO3306		642	sensor histidine kinase (NCBI ptt file)
78290	2	D11	139	4462432	+	0.9454	293	NA	NA	203361	1203	+	gene	pRL27	TagModule_0023	SO4282	ktrB	168	potassium uptake protein KtrB (NCBI ptt file)
78291	2	D12	139	102046	-	0.9981	514	NA	NA	199290	148	-	gene	pRL27	TagModule_0024	SO0093		1972	NupC family protein (NCBI ptt file)
78292	2	E01	139	4471069	+	0.9951	607	NA	NA	203371	789	-	gene	pRL27	TagModule_0044	SO4292	pstS	226	phosphate ABC transporter, periplasmic phosphate-binding protein (NCBI ptt file)
78293	2	E02	139	388668	-	0.935	521	NA	NA	NA	NA		between	pRL27	TagModule_0046			NA
78294	2	E03	139	555941	-	0.9857	488	NA	NA	199726	68	+	gene	pRL27	TagModule_0015	SO0535		701	conserved hypothetical protein (NCBI ptt file)
78295	2	E04	140	69903	-	1	341	1	341	NA	NA		between	pRL27	TagModule_0016			NA
78296	2	E05	139	4116324	+	0.9598	348	NA	NA	203064	1283	-	gene	pRL27	TagModule_0017	SO3980		3303	cytochrome c552 nitrite reductase (NCBI ptt file)
78297	2	E06	139	2679195	-	0.9971	347	NA	NA	201685	1167	-	gene	pRL27	TagModule_0018	SO2545		NA	sensor histidine kinase (NCBI ptt file)
78298	2	E07	139	1512451	+	1	639	NA	NA	200627	9	-	gene	pRL27	TagModule_0019	SO1455		2003	DNA repair protein, RadC family (NCBI ptt file)
78299	2	E08	139	1923922	-	0.9752	799	NA	NA	200993	824	+	gene	pRL27	TagModule_0020	SO1831		4805	conserved hypothetical protein (NCBI ptt file)
78300	2	E09	140	148167	-	0.9881	672	NA	NA	203964	730	-	gene	pRL27	TagModule_0021	SOA0160		627	esterase, putative (NCBI ptt file)
78301	2	E10	140	52520	-	0.9852	603	NA	NA	NA	NA		between	pRL27	TagModule_0042			NA
78302	2	E11	139	3344996	-	0.9973	729	NA	NA	NA	NA		between	pRL27	TagModule_0023			NA
78303	2	E12	139	1120077	-	0.9794	674	NA	NA	200260	35	-	gene	pRL27	TagModule_0024	SO1078		NA	hypothetical protein (NCBI ptt file)
78304	2	F01	139	498944	-	1	280	NA	NA	NA	NA		between	pRL27	TagModule_0044			NA
78305	2	F02	139	3104819	-	0.977	649	NA	NA	202097	204	-	gene	pRL27	TagModule_0046	SO2974		NA	hypothetical protein (NCBI ptt file)	YES
78306	2	F03	139	2848945	+	0.9955	224	1	106	NA	NA		between	pRL27	TagModule_0015			NA
78307	2	F04	139	3320719	+	1	532	NA	NA	202291	642	-	gene	pRL27	TagModule_0047	SO3181		2244	polysaccharide biosynthesis domain protein (NCBI ptt file)
78308	2	F05	139	155859	-	0.9595	222	NA	NA	199344	144	+	gene	pRL27	TagModule_0017	SO0147		NA	hypothetical protein (NCBI ptt file)
78309	2	F06	139	4608192	+	0.9754	918	NA	NA	203491	735	-	gene	pRL27	TagModule_0018	SO4414		NA	conserved domain protein (NCBI ptt file)
78310	2	F07	140	69307	-	0.9844	64	0.9844	64	NA	NA		between	pRL27	TagModule_0019			NA
78311	2	F08	139	4471471	+	0.9987	785	NA	NA	203371	387	-	gene	pRL27	TagModule_0020	SO4292	pstS	226	phosphate ABC transporter, periplasmic phosphate-binding protein (NCBI ptt file)
78312	2	F09	139	4750447	-	0.9729	808	NA	NA	203625	507	-	gene	pRL27	TagModule_0021	SO4554		3148	conserved hypothetical protein (NCBI ptt file)	YES	YES
78313	2	F10	139	3972199	-	0.9874	396	NA	NA	202910	378	-	gene	pRL27	TagModule_0042	SO3821		2200	rtn protein (NCBI ptt file)
78314	2	F11	139	3169881	+	0.9737	453	NA	NA	202176	1010	-	gene	pRL27	TagModule_0023	SO3057		2986	Pal/histidase family protein (NCBI ptt file)	YES	YES
78315	2	F12	140	105006	-	0.9766	679	NA	NA	NA	NA		between	pRL27	TagModule_0024			NA
78316	2	G01	139	65822	-	0.9944	714	NA	NA	199255	538	-	gene	pRL27	TagModule_0044	SO0058		569	potassium uptake protein, putative (NCBI ptt file)		YES
78317	2	G02	139	102472	+	0.9925	794	NA	NA	199291	120	+	gene	pRL27	TagModule_0046	SO0094		NA	hypothetical protein (NCBI ptt file)		YES
78318	2	G03	139	2268699	+	0.9831	234	NA	NA	370279	180	+	gene	pRL27	TagModule_0015	SO2153.2		NA	hypothetical transposase (NCBI ptt file)	YES
78319	2	G04	139	2056175	+	0.9821	723	NA	NA	NA	NA		between	pRL27	TagModule_0047			NA
78320	2	G05	139	4897974	-	0.9913	689	NA	NA	203765	322	-	gene	pRL27	TagModule_0017	SO4696		2818	hypothetical 3-methyladenine DNA glycosylase (NCBI ptt file)
78321	2	G06	139	4739996	-	0.9719	837	NA	NA	203613	764	+	gene	pRL27	TagModule_0018	SO4542		583	transcriptional regulator, LysR family (NCBI ptt file)
78322	2	G07	139	3667454	-	0.9792	383	NA	NA	202615	2265	-	gene	pRL27	TagModule_0019	SO3514		1629	hypothetical TonB-dependent receptor (NCBI ptt file)
78323	2	G08	139	530050	-	0.9726	929	NA	NA	199694	519	+	overlap	pRL27	TagModule_0020	SO0503		701	conserved hypothetical protein (NCBI ptt file)
78324	2	G09	140	115787	-	1	468	NA	NA	NA	NA		between	pRL27	TagModule_0021			NA
78325	2	G10	139	4209188	-	0.9941	503	NA	NA	203139	2041	-	gene	pRL27	TagModule_0042	SO4055	metL	527	aspartokinase II/homoserine dehydrogenase, methionine-sensitive (NCBI ptt file)
78326	2	G11	139	727222	+	0.9878	819	NA	NA	199897	623	-	gene	pRL27	TagModule_0023	SO0709		NA	hypothetical protein (NCBI ptt file)
78327	2	G12	140	59477	-	0.9955	672	NA	NA	203896	15	-	gene	pRL27	TagModule_0024	SOA0074		3293	ISSod6, transposase (NCBI ptt file)
78328	2	H01	140	115787	-	1	323	NA	NA	NA	NA		between	pRL27	TagModule_0044			NA
78329	2	H02	139	565912	-	0.9746	700	NA	NA	199735	1448	+	gene	pRL27	TagModule_0046	SO0544		NA	sensory box histidine kinase (NCBI ptt file)
78330	2	H03	139	3600949	-	0.9891	274	NA	NA	202559	890	-	gene	pRL27	TagModule_0043	SO3456		2265	RNA methyltransferase, TrmA family (NCBI ptt file)
78331	2	H05	139	4261306	+	0.9714	384	NA	NA	203185	435	-	gene	pRL27	TagModule_0017	SO4101	mshP	NA	MSHA biogenesis protein MshP (NCBI ptt file)		YES
78332	2	H06	139	3011286	-	0.9788	514	NA	NA	NA	NA		between	pRL27	TagModule_0018			NA
78333	2	H08	140	135790	-	0.9836	666	NA	NA	NA	NA		between	pRL27	TagModule_0020			NA
78334	2	H09	139	4211262	-	0.9743	544	NA	NA	203140	1160	-	gene	pRL27	TagModule_0021	SO4056	metB	626	cystathionine gamma-synthase (NCBI ptt file)
78335	2	H10	139	4179635	+	1	648	NA	NA	203109	2376	+	gene	pRL27	TagModule_0042	SO4025		NA	OmpA-like transmembrane domain protein (NCBI ptt file)
78336	2	H11	139	2274231	-	0.996	248	0.996	248	NA	NA		between	pRL27	TagModule_0023			NA
78337	2	H12	139	437815	+	0.9961	259	NA	NA	199615	249	+	gene	pRL27	TagModule_0024	SO0423	pdhR	2186	pyruvate dehydrogenase complex repressor (NCBI ptt file)	YES
79154	3	A02	139	35821	-	1	253	NA	NA	199227	596	-	gene	pRL27	TagModule_0026	SO0030	sun	144	sun protein (NCBI ptt file)
79155	3	A03	139	3076668	-	1	147	NA	NA	202063	3800	-	gene	pRL27	TagModule_0027	SO2940		4733	prophage LambdaSo, host specificity protein J, putative (NCBI ptt file)
79156	3	A04	139	1133576	+	0.955	929	NA	NA	200275	242	-	gene	pRL27	TagModule_0028	SO1094		NA	hypothetical Transcription elongation factor (NCBI ptt file)
79157	3	A05	139	2836833	-	0.9962	791	NA	NA	201856	227	-	gene	pRL27	TagModule_0029	SO2718		738	conserved hypothetical protein (NCBI ptt file)
79158	3	A06	139	1542954	-	0.9922	638	NA	NA	200651	794	+	gene	pRL27	TagModule_0030	SO1480		2199	GGDEF family protein (NCBI ptt file)
79159	3	A07	139	653199	+	0.9851	538	NA	NA	199815	97	-	gene	pRL27	TagModule_0031	SO0627		1514	putative 2'-5' RNA ligase (NCBI ptt file)	YES	YES
79160	3	A08	139	2982907	+	0.9566	530	NA	NA	201983	357	-	gene	pRL27	TagModule_0032	SO2857		4147	sodium/solute symporter family protein (NCBI ptt file)
79161	3	A09	139	4548772	-	0.9471	454	NA	NA	203434	1309	-	gene	pRL27	TagModule_0034	SO4356		NA	conserved domain protein (NCBI ptt file)
79162	3	A10	139	2668439	+	0.9984	618	NA	NA	201678	977	-	gene	pRL27	TagModule_0034	SO2538		1639	response regulator (NCBI ptt file)
79163	3	A12	139	2004139	-	0.9954	655	NA	NA	201064	254	+	gene	pRL27	TagModule_0036	SO1903		NA	hypothetical protein (NCBI ptt file)	YES	YES
79164	3	B03	139	591586	-	0.9801	843	NA	NA	199760	20	-	gene	pRL27	TagModule_0027	SO0570		NA	response regulator (NCBI ptt file)
79165	3	B04	139	574205	-	0.9635	190	NA	NA	NA	NA		between	pRL27	TagModule_0028			NA
79166	3	B05	139	3381007	+	0.9933	295	NA	NA	202349	1106	-	gene	pRL27	TagModule_0029	SO3241	flgJ	1705	flagellar protein FlgJ (NCBI ptt file)
79167	3	B06	139	2321299	-	0.9551	354	0.9494	354	NA	NA		between	pRL27	TagModule_0030			NA
79168	3	B07	139	4645463	-	0.9648	708	NA	NA	203530	320	-	gene	pRL27	TagModule_0031	SO4455		3296	conserved hypothetical protein (NCBI ptt file)
79169	3	B08	139	65342	-	0.9752	954	NA	NA	199254	318	-	gene	pRL27	TagModule_0032	SO0057		168	potassium uptake protein, Trk family (NCBI ptt file)	YES
79170	3	B09	139	4229549	+	0.9417	549	NA	NA	NA	NA		between	pRL27	TagModule_0033			NA
79171	3	B10	139	1935504	+	0.9802	890	NA	NA	201006	2506	+	gene	pRL27	TagModule_0034	SO1844		2374	extracellular nuclease, putative (NCBI ptt file)
79172	3	B11	139	4808733	-	0.9511	631	NA	NA	203684	676	+	gene	pRL27	TagModule_0035	SO4614	ctaB	109	protoheme IX farnesyltransferase (NCBI ptt file)		YES
79173	3	B12	140	151012	+	0.975	995	0.9793	675	NA	NA		between	pRL27	TagModule_0036			NA
79174	3	C01	139	1476347	-	0.9593	560	NA	NA	200593	535	-	gene	pRL27	TagModule_0025	SO1418		1477	apbE family protein (NCBI ptt file)
79175	3	C02	139	4470140	+	0.9924	658	NA	NA	203370	827	-	gene	pRL27	TagModule_0026	SO4291	pstC	573	phosphate ABC transporter, permease protein (NCBI ptt file)
79176	3	C03	140	37535	-	0.9375	176	NA	NA	203872	309	-	gene	pRL27	TagModule_0027	SOA0048		1506	prolyl oligopeptidase family protein (NCBI ptt file)
79177	3	C04	140	2803	-	0.9979	482	NA	NA	203829	152	+	gene	pRL27	TagModule_0028	SOA0002		1476	type II restriction-modification system activator, putative (NCBI ptt file)
79178	3	C05	139	1345027	-	0.9764	382	NA	NA	NA	NA		between	pRL27	TagModule_0029			NA
79179	3	C06	139	4308179	+	0.9943	524	NA	NA	203230	1993	+	gene	pRL27	TagModule_0030	SO4147		2274	ABC transporter, ATP-binding/permease protein (NCBI ptt file)
79180	3	C07	139	938024	-	1	437	NA	NA	NA	NA		between	pRL27	TagModule_0031			NA
79181	3	C08	139	3080248	+	0.9568	437	NA	NA	202063	220	-	gene	pRL27	TagModule_0032	SO2940		4733	prophage LambdaSo, host specificity protein J, putative (NCBI ptt file)
79182	3	C09	139	1544944	-	0.9767	514	NA	NA	200652	784	+	gene	pRL27	TagModule_0033	SO1481		475	glutathione-regulated potassium-efflux system protein (NCBI ptt file)
79183	3	C10	139	651584	-	0.9903	518	NA	NA	NA	NA		between	pRL27	TagModule_0034			NA
79184	3	C11	139	705858	-	0.94	565	NA	NA	199875	242	+	gene	pRL27	TagModule_0035	SO0687		NA	hypothetical protein (NCBI ptt file)	YES
79185	3	C12	140	71218	+	0.9671	514	NA	NA	NA	NA		between	pRL27	TagModule_0036			NA
79186	3	D02	139	4025187	+	0.9886	702	NA	NA	202962	127	+	gene	pRL27	TagModule_0026	SO3877		NA	hypothetical protein (NCBI ptt file)	YES	YES
79187	3	D03	139	1926808	-	0.9711	275	NA	NA	NA	NA		between	pRL27	TagModule_0027			NA
79188	3	D04	139	1553533	-	0.9894	839	NA	NA	200658	134	-	gene	pRL27	TagModule_0028	SO1487		NA	hypothetical protein (NCBI ptt file)		YES
79189	3	D05	139	1499349	-	0.9773	863	NA	NA	200610	519	+	gene	pRL27	TagModule_0029	SO1436		NA	ISSod11, transposase (NCBI ptt file)	YES
79190	3	D06	139	4017536	-	1	639	NA	NA	202957	102	-	gene	pRL27	TagModule_0030	SO3871		NA	thiol:disulfide interchange protein, DsbA family (NCBI ptt file)
79191	3	D07	139	603134	+	0.9911	448	NA	NA	199768	57	+	gene	pRL27	TagModule_0031	SO0578		NA	hypothetical protein (NCBI ptt file)
79192	3	D08	139	2580415	-	0.9679	801	NA	NA	NA	NA		between	pRL27	TagModule_0032			NA
79193	3	D09	139	1497422	+	0.9749	677	NA	NA	NA	NA		between	pRL27	TagModule_0033			NA
79194	3	D10	139	1800389	-	0.9869	608	NA	NA	200876	124	+	gene	pRL27	TagModule_0034	SO1712		3710	transcriptional regulator, putative (NCBI ptt file)
79195	3	D12	139	95746	-	0.9932	730	NA	NA	199281	82	-	gene	pRL27	TagModule_0036	SO0084		4229	HAD-superfamily hydrolase, subfamily IA, variant 1 family protein (NCBI ptt file)
79196	3	E01	139	4584617	+	0.9681	375	NA	NA	203466	50	+	gene	pRL27	TagModule_0038	SO4388		745	DNA-binding response regulator (NCBI ptt file)
79197	3	E02	139	4065953	+	0.966	613	NA	NA	203003	983	+	gene	pRL27	TagModule_0026	SO3918		NA	conserved hypothetical protein (NCBI ptt file)
79198	3	E03	139	4471884	+	0.996	498	NA	NA	NA	NA		between	pRL27	TagModule_0027			NA
79199	3	E04	139	22101	+	0.9756	450	NA	NA	NA	NA		between	pRL27	TagModule_0028			NA
79200	3	E05	139	3110134	-	1	687	NA	NA	202105	121	-	gene	pRL27	TagModule_0029	SO2982		NA	hypothetical protein (NCBI ptt file)
79201	3	E06	140	39956	-	0.9914	231	NA	NA	203873	1157	-	gene	pRL27	TagModule_0030	SOA0049		2274	toxin secretion ABC transporter, ATP-binding subunit/permease protein, putative (NCBI ptt file)
79202	3	E07	139	4934997	+	0.9911	560	NA	NA	203799	867	+	gene	pRL27	TagModule_0031	SO4730	hemN	635	oxygen-independent coproporphyrinogen III oxidase (NCBI ptt file)
79203	3	E08	140	69253	-	0.9799	397	0.9799	397	NA	NA		between	pRL27	TagModule_0032			NA
79204	3	E09	139	4463142	-	0.9969	641	NA	NA	203362	543	+	gene	pRL27	TagModule_0033	SO4283		1477	apbE family protein (NCBI ptt file)
79205	3	E10	140	113468	+	0.9535	405	NA	NA	203936	28	+	gene	pRL27	TagModule_0034	SOA0129		2801	transposase, IS3 family (NCBI ptt file)
79206	3	E11	139	4463149	+	1	420	NA	NA	203362	550	+	gene	pRL27	TagModule_0035	SO4283		1477	apbE family protein (NCBI ptt file)
79207	3	E12	139	1482892	-	0.9905	417	NA	NA	200599	187	+	gene	pRL27	TagModule_0036	SO1424		NA	hypothetical protein (NCBI ptt file)
79208	3	F01	140	102195	+	0.9815	325	0.9815	325	NA	NA		between	pRL27	TagModule_0038			NA
79209	3	F02	139	4264623	-	0.979	619	NA	NA	203190	388	-	gene	pRL27	TagModule_0026	SO4106	mshB	NA	MSHA pilin protein MshB (NCBI ptt file)
79210	3	F03	139	2588050	+	0.9913	346	NA	NA	NA	NA		between	pRL27	TagModule_0027			NA
79211	3	F04	140	27789	-	0.9803	851	NA	NA	203860	17	+	gene	pRL27	TagModule_0028	SO_A0036		4226	HicB-related protein (NCBI)
79212	3	F05	139	2970012	-	0.9952	411	0.9952	411	NA	NA		between	pRL27	TagModule_0029			NA
79213	3	F06	140	120550	+	0.9772	390	NA	NA	NA	NA		between	pRL27	TagModule_0030			NA
79214	3	F07	139	3770216	+	0.984	929	NA	NA	NA	NA		between	pRL27	TagModule_0031			NA
79215	3	F08	139	482437	-	1	363	NA	NA	NA	NA		between	pRL27	TagModule_0032			NA
79216	3	F09	139	4459648	+	1	401	NA	NA	203359	76	-	gene	pRL27	TagModule_0033	SO4280		NA	hypothetical protein (NCBI ptt file)	YES	YES
79217	3	F10	139	187835	-	0.9757	530	NA	NA	199379	282	+	gene	pRL27	TagModule_0034	SO0182		NA	hypothetical protein (NCBI ptt file)
79218	3	F11	140	2796	+	0.9776	626	NA	NA	203829	145	+	gene	pRL27	TagModule_0035	SOA0002		1476	type II restriction-modification system activator, putative (NCBI ptt file)
79219	3	F12	139	3692292	-	0.9632	725	NA	NA	NA	NA		between	pRL27	TagModule_0036			NA
79220	3	G02	139	4019038	-	0.9797	440	NA	NA	202958	982	+	gene	pRL27	TagModule_0026	SO3872		NA	arylsulfate sulfotransferase (NCBI ptt file)
79221	3	G03	139	4533589	+	0.9921	760	NA	NA	NA	NA		between	pRL27	TagModule_0027			NA
79222	3	G04	140	3832	+	0.9983	596	NA	NA	203830	945	+	gene	pRL27	TagModule_0028	SOA0003		NA	type II restriction endonuclease, putative (NCBI ptt file)
79223	3	G05	139	4465463	-	0.9894	377	NA	NA	NA	NA		between	pRL27	TagModule_0029			NA
79224	3	G06	139	1499327	-	0.9719	946	NA	NA	200610	497	+	gene	pRL27	TagModule_0030	SO1436		NA	ISSod11, transposase (NCBI ptt file)		YES
79225	3	G07	139	4214175	-	0.982	659	NA	NA	203144	701	-	gene	pRL27	TagModule_0031	SO4060	psrC	3301	polysulfide reductase, subunit C (NCBI ptt file)
79226	3	G08	140	26371	+	0.9882	505	NA	NA	203859	958	-	gene	pRL27	TagModule_0032	SOA0035		3328	ISSod4, transposase (NCBI ptt file)		YES
79227	3	G09	139	460729	+	0.9919	490	0.9872	77	NA	NA		between	pRL27	TagModule_0033			NA
79228	3	G10	139	1587217	-	0.9762	588	NA	NA	NA	NA		between	pRL27	TagModule_0034			NA
79229	3	G11	139	4817985	-	0.9831	760	NA	NA	203692	1076	-	gene	pRL27	TagModule_0035	SO4622		642	sensor histidine kinase (NCBI ptt file)
79230	3	G12	139	60991	-	0.9466	523	NA	NA	199251	1042	+	gene	pRL27	TagModule_0036	SO0054		2081	conserved hypothetical protein TIGR00275 (NCBI ptt file)
79231	3	H01	139	1097025	-	0.9385	64	NA	NA	NA	NA		between	pRL27	TagModule_0038			NA
79232	3	H02	139	4463149	+	0.9977	431	NA	NA	203362	550	+	gene	pRL27	TagModule_0026	SO4283		1477	apbE family protein (NCBI ptt file)
79233	3	H03	139	98157	+	0.9974	385	NA	NA	199285	358	-	gene	pRL27	TagModule_0027	SO0088		NA	hypothetical protein (NCBI ptt file)	YES
79234	3	H04	139	118969	-	0.9978	452	NA	NA	199305	222	+	gene	pRL27	TagModule_0028	SO0108		2391	hypothetical transporter component (NCBI ptt file)
79235	3	H05	139	1023416	+	0.9976	410	NA	NA	200174	562	-	gene	pRL27	TagModule_0029	SO0990		1574	urease domain protein (NCBI ptt file)		YES
79236	3	H06	139	2532209	-	0.9569	779	NA	NA	201566	59	-	gene	pRL27	TagModule_0030	SO2422		3139	conserved hypothetical protein (NCBI ptt file)	YES
79237	3	H07	140	26292	+	0.9774	442	0.9569	208	NA	NA		between	pRL27	TagModule_0031			NA
79238	3	H08	140	134528	-	0.9986	730	NA	NA	NA	NA		between	pRL27	TagModule_0032			NA
79239	3	H09	139	45812	-	0.9848	328	0.9817	327	NA	NA		between	pRL27	TagModule_0033			NA
79240	3	H10	139	1806995	-	0.9749	435	NA	NA	200884	307	-	gene	pRL27	TagModule_0034	SO1720		586	DedA family protein (NCBI ptt file)	YES	YES
79241	3	H11	140	82517	-	0.9898	195	0.9848	195	NA	NA		between	pRL27	TagModule_0035			NA
79242	3	H12	139	3753101	-	1	485	NA	NA	202684	117	+	gene	pRL27	TagModule_0036	SO3587		NA	hypothetical protein (NCBI ptt file)
80039	4	A01	139	676425	-	0.9946	367	NA	NA	199839	446	+	gene	pRL27	TagModule_0037	SO0651		4382	conserved hypothetical protein (NCBI ptt file)	YES	YES
80040	4	A02	139	799915	+	0.9943	175	NA	NA	199970	62	-	gene	pRL27	TagModule_0038	SO0784		NA	hypothetical protein (NCBI ptt file)		YES
80041	4	A03	139	697640	+	0.9814	797	NA	NA	199868	1019	+	gene	pRL27	TagModule_0039	SO0680		NA	hypothetical protein (NCBI ptt file)
80042	4	A04	139	1298442	+	0.9551	502	NA	NA	200425	379	+	gene	pRL27	TagModule_0040	SO1247		NA	hypothetical protein (NCBI ptt file)	YES
80043	4	A05	139	1063465	+	1	296	NA	NA	NA	NA		between	pRL27	TagModule_0041			NA
80044	4	A06	140	151519	+	0.9828	521	NA	NA	NA	NA		between	pRL27	TagModule_0042			NA
80045	4	A07	139	101083	-	1	386	NA	NA	199290	1111	-	gene	pRL27	TagModule_0043	SO0093		1972	NupC family protein (NCBI ptt file)
80046	4	A08	140	41963	+	0.9782	908	NA	NA	203874	397	-	gene	pRL27	TagModule_0044	SOA0050		1566	toxin secretion, membrane fusion protein (NCBI ptt file)
80047	4	A09	139	3563025	-	0.9833	884	NA	NA	202530	14	+	gene	pRL27	TagModule_0045	SO3423	holC	2927	DNA polymerase III, chi subunit (NCBI ptt file)
80048	4	A10	139	4880996	-	0.9838	679	NA	NA	203750	43	-	gene	pRL27	TagModule_0046	SO4681		438	glycosyl transferase, group 1 family protein (NCBI ptt file)
80049	4	A11	139	2538057	-	0.9815	806	NA	NA	NA	NA		between	pRL27	TagModule_0047			NA
80050	4	A12	139	3679743	+	0.9812	841	NA	NA	202626	1936	-	gene	pRL27	TagModule_0048	SO3525		3419	type IV pilin biogenesis protein, putative (NCBI ptt file)
80051	4	B01	139	1470988	+	0.9924	261	NA	NA	200589	727	-	gene	pRL27	TagModule_0037	SO1414		1053	flavocytochrome c flavin subunit, putative (NCBI ptt file)
80052	4	B02	139	4442865	-	1	547	NA	NA	203347	1104	-	gene	pRL27	TagModule_0038	SO4266		3177	conserved hypothetical protein (NCBI ptt file)
80053	4	B03	139	157051	+	0.9983	577	NA	NA	NA	NA		between	pRL27	TagModule_0039			NA
80054	4	B04	139	798267	-	0.9496	666	NA	NA	199969	1142	-	gene	pRL27	TagModule_0040	SO0783		3972	hypothetical protein (NCBI ptt file)
80055	4	B05	139	4221380	+	0.9843	877	NA	NA	NA	NA		between	pRL27	TagModule_0041			NA
80056	4	B06	139	1079836	+	0.9828	917	NA	NA	NA	NA		between	pRL27	TagModule_0042			NA
80057	4	B07	139	3527105	+	0.9913	685	NA	NA	202496	565	-	gene	pRL27	TagModule_0043	SO3388		513	ATP-dependent RNA helicase, DEAD box family (NCBI ptt file)		YES
80058	4	B08	139	1503764	+	0.9955	670	NA	NA	200613	285	+	gene	pRL27	TagModule_0044	SO1441		NA	hypothetical protein (NCBI ptt file)
80059	4	B09	140	117216	+	0.9724	960	NA	NA	NA	NA		between	pRL27	TagModule_0045			NA
80060	4	B10	139	3403101	-	0.9729	697	NA	NA	202374	839	-	gene	pRL27	TagModule_0046	SO3266		NA	conserved domain protein (NCBI ptt file)
80061	4	B11	140	71051	+	0.9814	955	NA	NA	NA	NA		between	pRL27	TagModule_0047			NA
80062	4	B12	139	3628722	-	0.968	950	NA	NA	202583	1122	+	gene	pRL27	TagModule_0048	SO3480		NA	hypothetical protein phosphatase (NCBI ptt file)
80063	4	C01	139	2797515	+	0.9949	393	NA	NA	NA	NA		between	pRL27	TagModule_0037			NA
80064	4	C02	139	4618239	+	0.9508	423	NA	NA	203502	848	-	gene	pRL27	TagModule_0038	SO4427		642	sensor histidine kinase (NCBI ptt file)	YES
80065	4	C03	139	677220	+	0.974	795	NA	NA	199841	122	+	gene	pRL27	TagModule_0039	SO0653		NA	hypothetical protein (NCBI ptt file)
80066	4	C04	139	352964	+	0.962	737	NA	NA	199541	284	-	gene	pRL27	TagModule_0040	SO0346		1802	transcriptional regulator. GntR family (NCBI ptt file)
80067	4	C05	139	297949	-	0.9902	710	NA	NA	199485	32	-	gene	pRL27	TagModule_0041	SO0290		NA	hypothetical protein (NCBI ptt file)	YES
80068	4	C06	139	468969	+	0.9836	728	NA	NA	199633	759	-	gene	pRL27	TagModule_0042	SO0441	purD	151	phosphoribosylamine--glycine ligase (NCBI ptt file)
80069	4	C07	139	691905	-	0.9722	467	NA	NA	199861	1001	+	gene	pRL27	TagModule_0043	SO0673		NA	hypothetical protein (NCBI ptt file)
80070	4	C08	140	103377	+	0.987	536	0.987	536	NA	NA		between	pRL27	TagModule_0044			NA
80071	4	C09	139	2282669	-	0.9915	701	NA	NA	NA	NA		between	pRL27	TagModule_0045			NA
80072	4	C10	139	3452926	-	0.9885	524	NA	NA	202411	1447	-	gene	pRL27	TagModule_0046	SO3303		NA	chitinase domain protein (NCBI ptt file)
80073	4	C11	139	703777	-	0.9861	504	NA	NA	199871	348	+	gene	pRL27	TagModule_0047	SO0683		NA	hypothetical protein (NCBI ptt file)
80074	4	C12	139	4626575	-	0.9571	508	NA	NA	NA	NA		between	pRL27	TagModule_0048			NA
80075	4	D02	139	2101667	-	0.9966	592	NA	NA	201162	1678	+	gene	pRL27	TagModule_0038	SO2001	ushA	737	5'-nucleotidase (NCBI ptt file)
80076	4	D03	139	1133565	-	0.9973	737	NA	NA	200275	253	-	gene	pRL27	TagModule_0039	SO1094		NA	hypothetical Transcription elongation factor (NCBI ptt file)
80077	4	D04	139	601707	+	0.9763	715	NA	NA	199767	2326	+	gene	pRL27	TagModule_0040	SO0577		642	sensory box histidine kinase/response regulator (NCBI ptt file)
80078	4	D05	139	2801464	-	0.9939	163	NA	NA	201815	277	+	gene	pRL27	TagModule_0041	SO2677		NA	conserved hypothetical protein (NCBI ptt file)		YES
80079	4	D06	139	861762	-	0.9842	747	NA	NA	200027	467	+	gene	pRL27	TagModule_0042	SO0841		2199	GGDEF domain protein (NCBI ptt file)
80080	4	D07	139	314894	-	1	113	NA	NA	NA	NA		between	pRL27	TagModule_0043			NA
80081	4	D08	139	4652795	+	0.9784	953	NA	NA	203540	953	+	gene	pRL27	TagModule_0044	SO4465		1262	conserved domain protein (NCBI ptt file)
80082	4	D09	140	34714	+	0.9679	592	NA	NA	203869	1091	+	gene	pRL27	TagModule_0045	SO_A0045		4974	site-specific recombinase, phage integrase family (NCBI)
80083	4	D10	140	117238	+	0.979	889	NA	NA	NA	NA		between	pRL27	TagModule_0046			NA
80084	4	D11	139	4103713	+	0.9898	683	NA	NA	203046	106	+	gene	pRL27	TagModule_0047	SO3962	yfiA-3	1544	ribosomal subunit interface protein (NCBI ptt file)
80085	4	D12	139	1063281	-	0.9871	919	NA	NA	NA	NA		between	pRL27	TagModule_0048			NA
80086	4	E01	139	1268977	+	0.9611	736	NA	NA	200400	522	-	gene	pRL27	TagModule_0037	SO1222		3726	hypothetical protein (NCBI ptt file)
80087	4	E02	140	52121	-	0.9892	276	0.9856	276	NA	NA		between	pRL27	TagModule_0038			NA
80088	4	E03	140	36012	+	1	700	NA	NA	203872	1832	-	gene	pRL27	TagModule_0039	SOA0048		1506	prolyl oligopeptidase family protein (NCBI ptt file)
80089	4	E04	139	1093833	+	0.9594	440	NA	NA	200237	343	+	gene	pRL27	TagModule_0040	SO1055		2199	sensory box protein (NCBI ptt file)
80090	4	E05	139	3947171	+	0.9804	714	NA	NA	202885	1986	+	gene	pRL27	TagModule_0041	SO3794		2849	conserved domain protein (NCBI ptt file)
80091	4	E06	139	4131390	+	0.9834	890	NA	NA	203077	902	-	gene	pRL27	TagModule_0042	SO3993		NA	hypothetical protein (NCBI ptt file)
80092	4	E07	139	363106	-	0.9711	345	NA	NA	199550	904	-	gene	pRL27	TagModule_0043	SO0355		1022	AMP-binding protein (NCBI ptt file)
80093	4	E08	139	3208745	-	0.9857	897	NA	NA	202201	3710	+	gene	pRL27	TagModule_0044	SO3084		5001	sensory box protein (NCBI ptt file)
80094	4	E09	139	4132692	-	0.9968	617	NA	NA	203078	601	-	gene	pRL27	TagModule_0045	SO3994		NA	hypothetical protein (NCBI ptt file)
80095	4	E10	139	147241	-	0.99	500	NA	NA	199338	2598	-	gene	pRL27	TagModule_0046	SO0141		5001	sensory box protein (NCBI ptt file)
80096	4	E11	139	4197786	-	0.991	334	NA	NA	203127	983	+	gene	pRL27	TagModule_0047	SO4043		NA	TonB domain protein (NCBI ptt file)
80097	4	E12	140	31223	-	0.9444	194	NA	NA	203865	146	+	gene	pRL27	TagModule_0048	SOA0041		2337	transcriptional regulator, PemK family (NCBI ptt file)
80098	4	F01	139	1322088	-	0.9932	589	NA	NA	200451	385	+	gene	pRL27	TagModule_0037	SO1273		1177	polyamine ABC transporter, permease protein (NCBI ptt file)
80099	4	F02	139	2432147	+	0.9967	609	NA	NA	NA	NA		between	pRL27	TagModule_0038			NA
80100	4	F03	139	3442810	-	0.9798	243	NA	NA	202406	806	-	gene	pRL27	TagModule_0039	SO3298		NA	conserved hypothetical protein (NCBI ptt file)
80101	4	F04	139	887924	+	0.9513	676	NA	NA	200045	5223	+	gene	pRL27	TagModule_0040	SO0859		642	sensory box histidine kinase/response regulator (NCBI ptt file)
80102	4	F05	140	59477	-	0.994	672	NA	NA	203896	15	-	gene	pRL27	TagModule_0041	SOA0074		3293	ISSod6, transposase (NCBI ptt file)
80103	4	F06	139	1651005	-	1	414	NA	NA	NA	NA		between	pRL27	TagModule_0042			NA
80104	4	F07	139	3553055	-	0.9869	605	NA	NA	202520	1144	-	gene	pRL27	TagModule_0043	SO3413	thrC	498	threonine synthase (NCBI ptt file)
80105	4	F08	139	1814798	-	1	701	NA	NA	200891	187	-	gene	pRL27	TagModule_0044	SO1727		NA	hypothetical protein (NCBI ptt file)
80106	4	F09	139	2101854	-	1	434	NA	NA	NA	NA		between	pRL27	TagModule_0045			NA
80107	4	F10	139	1816477	-	1	499	NA	NA	200896	171	-	gene	pRL27	TagModule_0046	SO1732		NA	cold shock domain family protein (NCBI ptt file)
80108	4	F11	139	930173	+	0.9608	652	NA	NA	200087	1243	+	gene	pRL27	TagModule_0047	SO0902	nqrA-1	1726	NADH:ubiquinone oxidoreductase, Na translocating, alpha subunit (NCBI ptt file)
80109	4	F12	139	696146	-	0.973	803	NA	NA	199867	391	+	gene	pRL27	TagModule_0048	SO0679		NA	hypothetical protein (NCBI ptt file)	YES	YES
80110	4	G01	140	63130	-	0.997	655	NA	NA	NA	NA		between	pRL27	TagModule_0037			NA
80111	4	G02	140	115795	+	0.9764	751	0.9655	711	NA	NA		between	pRL27	TagModule_0038			NA
80112	4	G04	139	4896311	+	0.9394	706	NA	NA	NA	NA		between	pRL27	TagModule_0040			NA
80113	4	G05	139	4427964	+	0.9721	538	NA	NA	203332	171	+	gene	pRL27	TagModule_0041	SO4251		1309	transcriptional regulator, TetR family (NCBI ptt file)
80114	4	G06	139	2273415	+	0.9621	475	NA	NA	201313	17	-	gene	pRL27	TagModule_0042	SO2159		NA	TonB domain protein (NCBI ptt file)
80115	4	G07	140	60293	-	1	636	NA	NA	NA	NA		between	pRL27	TagModule_0043			NA
80116	4	G08	139	3445728	+	0.9915	352	NA	NA	202408	158	-	gene	pRL27	TagModule_0044	SO3300		NA	cytochrome c (NCBI ptt file)	YES
80117	4	G09	139	4687438	+	0.9816	749	NA	NA	NA	NA		between	pRL27	TagModule_0045			NA
80118	4	G10	140	120411	+	0.9621	574	NA	NA	NA	NA		between	pRL27	TagModule_0046			NA
80119	4	G11	139	9764	+	0.986	850	NA	NA	199207	225	+	gene	pRL27	TagModule_0047	SO0010	recF	1195	DNA replication and repair protein RecF (NCBI ptt file)
80120	4	G12	140	125310	+	1	649	NA	NA	203944	92	+	gene	pRL27	TagModule_0048	SO_A0139		NA	hypothetical protein (NCBI)
80121	4	H03	139	1639866	+	0.9949	590	NA	NA	200728	1590	+	gene	pRL27	TagModule_0039	SO1561		NA	peptidase, M1 family (NCBI ptt file)	YES	YES
80122	4	H04	139	3781003	+	0.9002	409	NA	NA	202715	264	+	gene	pRL27	TagModule_0040	SO3618		NA	hypothetical protein (NCBI ptt file)		YES
80123	4	H05	139	406593	+	1	412	NA	NA	199585	538	+	gene	pRL27	TagModule_0041	SO0392		NA	lipoprotein, putative (NCBI ptt file)
80124	4	H06	139	1020939	+	0.9877	643	NA	NA	200172	208	-	gene	pRL27	TagModule_0042	SO0988		3383	formate dehydrogenase, alpha subunit (NCBI ptt file)
80125	4	H07	139	2676802	+	0.9959	242	NA	NA	201684	837	+	gene	pRL27	TagModule_0043	SO2544		642	sensor histidine kinase/response regulator (NCBI ptt file)
80126	4	H08	139	691844	+	0.9834	661	NA	NA	199861	940	+	gene	pRL27	TagModule_0044	SO0673		NA	hypothetical protein (NCBI ptt file)
80127	4	H09	139	2715821	-	0.9814	590	NA	NA	201728	592	-	gene	pRL27	TagModule_0045	SO2588		225	protein-methionine-S-oxide reductase, PilB family (NCBI ptt file)
80128	4	H10	140	22286	-	0.9693	550	NA	NA	203853	798	+	overlap	pRL27	TagModule_0046	SOA0029		2801	ISSod1, transposase OrfB (NCBI ptt file)
80129	4	H11	140	31466	-	0.9917	479	NA	NA	NA	NA		between	pRL27	TagModule_0047			NA
80130	4	H12	139	4848464	+	0.9184	196	NA	NA	203722	446	+	gene	pRL27	TagModule_0048	SO4652	sbp	1613	sulfate ABC transporter, periplasmic sulfate-binding protein (NCBI ptt file)
81050	5	A01	139	3208365	-	0.9706	68	NA	NA	202201	3330	+	gene	pRL27	TagModule_0071	SO3084		5001	sensory box protein (NCBI ptt file)
81051	5	A02	140	20338	-	0.9984	643	NA	NA	203850	344	-	gene	pRL27		SO_A0025		2801	ISSod1, transposase OrfA (NCBI)
81052	5	A03	139	2667601	-	1	323	NA	NA	201677	381	-	gene	pRL27	TagModule_0029	SO2537		25	sodium/hydrogen exchanger family protein (NCBI ptt file)
81053	5	A04	139	2625878	-	1	356	NA	NA	201641	484	-	gene	pRL27	TagModule_0071	SO2500		NA	conserved hypothetical protein (NCBI ptt file)	YES
81054	5	A05	139	4111825	-	1	425	NA	NA	203058	96	+	gene	pRL27	TagModule_0093	SO3974		NA	conserved domain protein (NCBI ptt file)
81055	5	A07	139	4462627	+	1	350	NA	NA	203362	28	+	gene	pRL27	TagModule_0033	SO4283		1477	apbE family protein (NCBI ptt file)
81056	5	A08	139	2683197	-	1	103	NA	NA	201690	633	+	gene	pRL27	TagModule_0092	SO2550		664	transcriptional regulator-related protein (NCBI ptt file)	YES	YES
81057	5	A09	139	674818	+	1	192	NA	NA	199836	89	+	gene	pRL27	TagModule_0068	SO0648		NA	conserved hypothetical protein (NCBI ptt file)		YES
81058	5	A10	139	3324494	+	0.989	182	NA	NA	202295	52	-	gene	pRL27	TagModule_0075	SO3185		399	polysaccharide biosynthesis protein (NCBI ptt file)	YES
81059	5	A11	139	3274400	+	0.979	236	NA	NA	370217	274	+	gene	pRL27	TagModule_0083	SO3140.1		NA	hypothetical protein (NCBI ptt file)	YES	YES
81060	5	A12	139	421710	+	0.9831	235	NA	NA	NA	NA		between	pRL27	TagModule_0052			NA
81061	5	B02	139	3088860	+	1	561	NA	NA	202074	1245	-	gene	pRL27	TagModule_0087	SO2951		NA	hypothetical protein (NCBI ptt file)
81062	5	B03	139	728528	+	1	223	NA	NA	199898	726	-	gene	pRL27	TagModule_0067	SO0710		NA	hypothetical protein (NCBI ptt file)
81063	5	B04	139	3166094	-	0.9572	303	NA	NA	202171	109	-	gene	pRL27	TagModule_0088	SO3052		840	methyl-accepting chemotaxis protein (NCBI ptt file)		YES
81064	5	B05	139	1121875	+	0.9901	403	NA	NA	200263	1054	-	gene	pRL27		SO1081		NA	hypothetical protein (NCBI ptt file)
81065	5	B06	139	2814108	-	0.9045	199	NA	NA	201833	353	+	gene	pRL27	TagModule_0039	SO2695		4518	conserved hypothetical protein (NCBI ptt file)
81066	5	B07	139	777436	+	0.9981	522	NA	NA	199948	520	+	gene	pRL27	TagModule_0035	SO0762		1335	isochorismatase family protein (NCBI ptt file)
81067	5	B09	139	3476425	-	0.9972	708	NA	NA	NA	NA		between	pRL27	TagModule_0066			NA
81068	5	B10	139	4850717	+	0.9791	285	NA	NA	203724	794	+	gene	pRL27	TagModule_0055	SO4654	cysW-2	4208	sulfate ABC transporter, permease protein (NCBI ptt file)
81069	5	B11	139	30617	-	0.9847	522	NA	NA	199222	59	+	gene	pRL27	TagModule_0056	SO0025		4635	hypothetical flavodoxin (NCBI ptt file)
81070	5	B12	139	4674418	+	1	130	NA	NA	203562	231	+	gene	pRL27	TagModule_0059	SO4487		745	DNA-binding response regulator (NCBI ptt file)
81071	5	C01	139	501868	+	1	48	NA	NA	199669	260	-	gene	pRL27	TagModule_0077	SO0478	ccmF-2	1138	cytochrome c-type biogenesis protein CcmF (NCBI ptt file)
81072	5	C02	139	1071007	+	0.9948	773	NA	NA	200214	252	+	gene	pRL27	TagModule_0059	SO1031		406	alpha-ribazole-5'-phosphate phosphatase, putative (NCBI ptt file)
81073	5	C03	139	664719	-	0.9385	308	NA	NA	199827	2998	-	gene	pRL27	TagModule_0072	SO0639		NA	Collagenase family (NCBI ptt file)
81074	5	C04	139	1863208	-	0.9583	430	NA	NA	200942	689	-	gene	pRL27	TagModule_0034	SO1779	omcA	NA	decaheme cytochrome c (NCBI ptt file)
81075	5	C05	139	4901338	-	0.9936	466	NA	NA	203768	527	-	gene	pRL27	TagModule_0041	SO4699	prlC	339	oligopeptidase A (NCBI ptt file)
81076	5	C06	139	2219597	-	1	290	NA	NA	201273	2049	-	gene	pRL27	TagModule_0080	SO2116		1042	acetyltransferase, GNAT family (NCBI ptt file)
81077	5	C07	139	2432943	+	1	486	NA	NA	201467	107	+	gene	pRL27	TagModule_0017	SO2323		840	methyl-accepting chemotaxis protein (NCBI ptt file)
81078	5	C08	140	63402	-	0.9478	402	0.9428	402	NA	NA		between	pRL27	TagModule_0071			NA
81079	5	C09	139	3675872	-	0.9987	761	NA	NA	202622	355	+	gene	pRL27	TagModule_0058	SO3521		4970	type IV pilus biogenesis protein, putative (NCBI ptt file)
81080	5	C10	139	282202	-	1	275	NA	NA	199471	666	+	gene	pRL27	TagModule_0063	SO0276	argB	548	acetylglutamate kinase (NCBI ptt file)	YES	YES
81081	5	C11	139	4772188	+	0.9542	306	NA	NA	203647	300	-	gene	pRL27	TagModule_0042	SO4577		NA	conserved domain protein (NCBI ptt file)	YES	YES
81082	5	C12	139	3323027	+	0.9757	574	NA	NA	202294	443	-	gene	pRL27	TagModule_0029	SO3184		NA	conserved hypothetical protein (NCBI ptt file)
81083	5	D01	140	153730	-	0.9767	429	NA	NA	203967	27	-	gene	pRL27	TagModule_0071	SOA0164		1454	iron-containing alcohol dehydrogenase (NCBI ptt file)
81084	5	D02	139	3325891	+	1	109	NA	NA	NA	NA		between	pRL27	TagModule_0085			NA
81085	5	D04	140	63518	-	0.9686	287	0.9617	287	NA	NA		between	pRL27	TagModule_0093			NA
81086	5	D08	139	379704	+	1	610	NA	NA	NA	NA		between	pRL27	TagModule_0024			NA
81087	5	D09	139	4463141	-	0.9714	105	NA	NA	203362	542	+	gene	pRL27	TagModule_0004	SO4283		1477	apbE family protein (NCBI ptt file)
81088	5	D10	139	4067355	+	0.994	660	NA	NA	NA	NA		between	pRL27	TagModule_0055			NA
81089	5	D11	140	50563	+	0.9917	120	NA	NA	203886	139	+	gene	pRL27	TagModule_0059	SOA0062		NA	hypothetical protein (NCBI ptt file)
81090	5	E01	140	132966	-	0.9653	286	0.9653	286	NA	NA		between	pRL27	TagModule_0046			NA
81091	5	E02	140	69368	-	0.9946	185	0.9946	185	NA	NA		between	pRL27	TagModule_0046			NA
81092	5	E03	139	4222154	+	1	164	NA	NA	203152	710	+	gene	pRL27	TagModule_0039	SO4068		NA	hypothetical protein (NCBI ptt file)
81093	5	E04	139	744513	-	0.9919	248	NA	NA	199918	1531	-	gene	pRL27	TagModule_0080	SO0730		NA	hypothetical protein (NCBI ptt file)
81094	5	E05	140	135614	-	0.9655	58	NA	NA	2200911	136	+	gene	pRL27	TagModule_0035	SO_A0183		NA	hypothetical protein (NCBI)
81095	5	E06	139	852450	+	0.9925	532	NA	NA	200020	402	-	gene	pRL27	TagModule_0032	SO0834		3091	sprT protein, putative (NCBI ptt file)
81096	5	E07	139	764495	-	1	289	NA	NA	199932	36	-	gene	pRL27	TagModule_0081	SO0746		625	glutathione S-transferase family protein (NCBI ptt file)
81097	5	E08	139	652014	-	0.989	91	NA	NA	199813	214	+	gene	pRL27	TagModule_0007	SO0625		NA	conserved domain protein (NCBI ptt file)
81098	5	E09	139	408914	+	0.9688	64	NA	NA	199588	331	-	gene	pRL27	TagModule_0092	SO0395	prmA	2264	ribosomal protein L11 methyltransferase (NCBI ptt file)
81099	5	E11	139	1970206	-	1	183	NA	NA	NA	NA		between	pRL27	TagModule_0087			NA
81100	5	E12	139	3631489	+	0.989	546	NA	NA	202587	456	+	gene	pRL27	TagModule_0075	SO3484		841	AcrB/AcrD/AcrF family protein (NCBI ptt file)
81101	5	F02	140	131508	-	0.9904	104	0.9904	104	NA	NA		between	pRL27	TagModule_0034			NA
81102	5	F03	139	1371065	+	1	263	NA	NA	200489	59	-	gene	pRL27	TagModule_0032	SO1314		739	peptidase, M23/M37 family (NCBI ptt file)
81103	5	F04	139	4884324	+	0.9844	64	NA	NA	203754	1096	+	gene	pRL27	TagModule_0040	SO4685		NA	conserved hypothetical protein (NCBI ptt file)
81104	5	F05	139	2082462	-	1	124	NA	NA	NA	NA		between	pRL27	TagModule_0026			NA
81105	5	F06	139	1475767	+	1	103	NA	NA	200593	1115	-	gene	pRL27	TagModule_0038	SO1418		1477	apbE family protein (NCBI ptt file)
81106	5	F07	139	4038283	+	1	344	NA	NA	NA	NA		between	pRL27	TagModule_0045			NA
81107	5	F08	139	1604899	+	0.9758	122	NA	NA	200699	388	+	gene	pRL27	TagModule_0026	SO1529	pomA	1291	chemotaxis motA protein (NCBI ptt file)
81108	5	F10	139	1737772	+	0.9909	547	NA	NA	200816	469	+	gene	pRL27	TagModule_0045	SO1651		553	Snf2 family protein (NCBI ptt file)
81109	5	F12	139	3773919	+	0.9956	229	0.9708	135	NA	NA		between	pRL27	TagModule_0049			NA
81110	5	G01	139	371566	+	1	302	NA	NA	NA	NA		between	pRL27	TagModule_0043			NA
81111	5	G02	139	1477618	-	0.9974	384	NA	NA	200594	549	+	gene	pRL27	TagModule_0093	SO1419		3976	hypothetical protein (NCBI ptt file)
81112	5	G03	139	501868	+	1	48	NA	NA	199669	260	-	gene	pRL27	TagModule_0077	SO0478	ccmF-2	1138	cytochrome c-type biogenesis protein CcmF (NCBI ptt file)
81113	5	G04	139	4440962	+	0.9902	410	NA	NA	203345	151	-	gene	pRL27	TagModule_0067	SO4264	hsdS-2	732	type I restriction-modification system, S subunit (NCBI ptt file)
81114	5	G05	140	83190	-	0.9982	548	0.9982	548	NA	NA		between	pRL27				NA
81115	5	G07	140	71556	+	0.9446	343	NA	NA	NA	NA		between	pRL27	TagModule_0049			NA
81116	5	G08	140	31961	+	0.9922	384	NA	NA	203866	422	+	gene	pRL27	TagModule_0029	SOA0042		NA	hypothetical protein (NCBI ptt file)
81117	5	G09	140	88184	+	1	137	NA	NA	NA	NA		between	pRL27	TagModule_0026			NA
81118	5	G10	140	115277	-	0.95	99	0.95	99	NA	NA		between	pRL27	TagModule_0020			NA
81119	5	G11	139	4738854	-	1	172	NA	NA	203610	94	-	gene	pRL27	TagModule_0074	SO4539		NA	serine protease, subtilase family (NCBI ptt file)
81120	5	G12	139	1801083	+	1	93	NA	NA	200876	818	+	gene	pRL27	TagModule_0010	SO1712		3710	transcriptional regulator, putative (NCBI ptt file)
81121	5	H01	139	518517	-	0.9677	62	NA	NA	NA	NA		between	pRL27				NA
81122	5	H04	139	4557454	-	1	71	NA	NA	203440	229	-	gene	pRL27	TagModule_0067	SO4362		3381	conserved hypothetical protein (NCBI ptt file)
81123	5	H06	139	2814108	-	1	97	NA	NA	201833	353	+	gene	pRL27		SO2695		4518	conserved hypothetical protein (NCBI ptt file)
81124	5	H07	139	2634061	-	0.9966	293	NA	NA	201648	468	+	gene	pRL27	TagModule_0032	SO2507		2200	GGDEF domain protein (NCBI ptt file)
81125	5	H10	139	2253815	-	1	42	NA	NA	201302	1834	-	gene	pRL27	TagModule_0043	SO2147	recD	507	exodeoxyribonuclease V, alpha subunit (NCBI ptt file)	YES
81126	5	H11	139	2592268	+	0.9802	302	NA	NA	201610	2522	+	gene	pRL27	TagModule_0092	SO2469		4206	hypothetical TonB-dependent receptor (NCBI ptt file)
81127	5	H12	139	520555	-	0.9918	122	NA	NA	199687	739	-	gene	pRL27	TagModule_0041	SO0496		189	conserved hypothetical protein (NCBI ptt file)
81946	6	A03	139	1078033	-	0.9843	696	NA	NA	200221	855	+	gene	pRL27	TagModule_0007	SO1038	cobQ	1492	cobyric acid synthase CobQ (NCBI ptt file)		YES
81947	6	A04	139	4551611	+	0.9958	480	NA	NA	203436	1993	-	gene	pRL27	TagModule_0008	SO4358	dmaA-2	243	anaerobic dimethyl sulfoxide reductase, A subunit (NCBI ptt file)
81948	6	A05	139	4548690	+	0.9057	212	NA	NA	203434	1391	-	gene	pRL27	TagModule_0009	SO4356		NA	conserved domain protein (NCBI ptt file)
81949	6	A06	139	4624124	+	0.9694	556	NA	NA	NA	NA		between	pRL27	TagModule_0010			NA
81950	6	A07	139	345466	-	0.9936	469	NA	NA	199536	541	-	gene	pRL27	TagModule_0012	SO0341		5001	sensory box protein (NCBI ptt file)
81951	6	A08	139	3897792	+	0.99	594	NA	NA	NA	NA		between	pRL27	TagModule_0013			NA
81952	6	A09	139	4466540	+	0.9986	714	NA	NA	203365	103	-	gene	pRL27	TagModule_0014	SO4286	motB	1360	chemotaxis motB protein (NCBI ptt file)	YES	YES
81953	6	A10	139	1453444	-	0.9857	899	NA	NA	200571	405	-	gene	pRL27	TagModule_0016	SO1396		2311	conserved hypothetical protein (NCBI ptt file)
81954	6	A11	139	2594340	+	0.9754	964	NA	NA	201613	122	+	gene	pRL27	TagModule_0025	SO2472		1876	D-alanyl-D-alanine carboxypeptidase-related protein (NCBI ptt file)	YES	YES
81955	6	B01	139	4590022	+	0.9927	686	NA	NA	NA	NA		between	pRL27	TagModule_0005			NA
81956	6	B02	139	4462873	-	0.9866	517	NA	NA	203362	274	+	gene	pRL27	TagModule_0006	SO4283		1477	apbE family protein (NCBI ptt file)
81957	6	B03	139	4438118	+	0.9985	666	NA	NA	NA	NA		between	pRL27	TagModule_0007			NA
81958	6	B04	139	931597	+	0.9877	566	NA	NA	200089	75	+	gene	pRL27	TagModule_0008	SO0904	nqrC-1	2869	NADH:ubiquinone oxidoreductase, Na translocating, gamma subunit (NCBI ptt file)		YES
81959	6	B05	139	673715	+	0.9766	920	NA	NA	199833	232	+	gene	pRL27	TagModule_0009	SO0645		NA	hypothetical protein (NCBI ptt file)
81960	6	B06	139	1956408	+	0.9582	967	NA	NA	NA	NA		between	pRL27	TagModule_0010			NA
81961	6	B07	139	3317672	-	1	377	NA	NA	202289	762	-	gene	pRL27	TagModule_0012	SO3179		NA	lipopolysaccharide biosynthesis polymerase, putative (NCBI ptt file)
81962	6	B08	139	2701410	+	0.9753	607	NA	NA	201711	76	+	gene	pRL27	TagModule_0013	SO2571		513	ATP-dependent RNA helicase, DEAD box family (NCBI ptt file)	YES
81963	6	B09	139	3323019	-	0.9868	826	NA	NA	202294	451	-	gene	pRL27	TagModule_0016	SO3184		NA	conserved hypothetical protein (NCBI ptt file)
81964	6	B10	139	2055051	-	1	288	NA	NA	201110	3035	+	gene	pRL27	TagModule_0016	SO1949		NA	invasin domain protein (NCBI ptt file)
81965	6	B11	139	3445337	+	0.9763	674	NA	NA	202407	71	-	gene	pRL27	TagModule_0025	SO3299		2986	Pal/histidase family protein (NCBI ptt file)
81966	6	B12	140	86681	-	0.9648	341	NA	NA	203920	1357	+	gene	pRL27	TagModule_0072	SOA0106		840	methyl-accepting chemotaxis protein (NCBI ptt file)
81967	6	C01	139	4019785	-	0.9825	284	NA	NA	202958	1729	+	gene	pRL27	TagModule_0005	SO3872		NA	arylsulfate sulfotransferase (NCBI ptt file)
81968	6	C02	139	2827109	+	0.9895	475	NA	NA	201844	1161	+	gene	pRL27	TagModule_0006	SO2706	astB	3724	succinylarginine dihydrolase (NCBI ptt file)
81969	6	C03	140	36132	+	1	508	NA	NA	203872	1712	-	gene	pRL27	TagModule_0007	SOA0048		1506	prolyl oligopeptidase family protein (NCBI ptt file)
81970	6	C04	139	520051	-	0.9952	623	NA	NA	NA	NA		between	pRL27	TagModule_0008			NA
81971	6	C05	139	4556879	+	1	419	NA	NA	203439	157	-	gene	pRL27	TagModule_0009	SO4361		NA	hypothetical protein (NCBI ptt file)
81972	6	C06	139	490517	+	0.9503	539	NA	NA	NA	NA		between	pRL27	TagModule_0005			NA
81973	6	C07	139	2872745	+	0.9965	563	NA	NA	201890	333	-	gene	pRL27	TagModule_0012	SO2752		824	conserved hypothetical protein TIGR00051 (NCBI ptt file)	YES	YES
81974	6	C08	139	4563817	-	0.9851	795	NA	NA	203447	225	+	gene	pRL27	TagModule_0013	SO4369		236	acyl carrier protein, putative (NCBI ptt file)		YES
81975	6	C09	139	2224852	+	0.9897	481	NA	NA	201276	1521	+	gene	pRL27	TagModule_0016	SO2119		2208	response regulator (NCBI ptt file)
81976	6	C10	139	4662612	+	0.9947	750	NA	NA	203548	115	-	gene	pRL27	TagModule_0016	SO4473		3637	outer membrane protein, putative (NCBI ptt file)
81977	6	C11	140	21130	-	0.9817	913	0.9817	913	NA	NA		between	pRL27	TagModule_0025			NA
81978	6	C12	140	53011	-	0.9868	756	0.9868	756	NA	NA		between	pRL27	TagModule_0072			NA
81979	6	D01	140	89029	+	0.9959	480	NA	NA	203922	267	+	gene	pRL27	TagModule_0005	SOA0108		NA	hypothetical protein (NCBI ptt file)
81980	6	D02	139	4096848	-	0.9894	758	NA	NA	203037	402	-	gene	pRL27	TagModule_0006	SO3953		767	conserved hypothetical protein TIGR00056 (NCBI ptt file)
81981	6	D03	139	4331108	-	0.9846	712	NA	NA	203238	711	-	gene	pRL27	TagModule_0007	SO4155		NA	sensor histidine kinase (NCBI ptt file)
81982	6	D04	139	4706270	+	0.9597	619	NA	NA	203587	645	+	gene	pRL27	TagModule_0008	SO4513		243	formate dehydrogenase, alpha subunit (NCBI ptt file)
81983	6	D05	139	1476657	-	1	695	NA	NA	200593	225	-	gene	pRL27	TagModule_0009	SO1418		1477	apbE family protein (NCBI ptt file)
81984	6	D06	139	651733	+	0.9889	807	NA	NA	NA	NA		between	pRL27	TagModule_0005			NA
81985	6	D07	139	727349	+	0.9739	911	NA	NA	199897	496	-	gene	pRL27	TagModule_0012	SO0709		NA	hypothetical protein (NCBI ptt file)
81986	6	D08	139	1619202	+	0.9965	567	NA	NA	200711	553	-	gene	pRL27	TagModule_0013	SO1543		NA	hypothetical protein (NCBI ptt file)
81987	6	D10	140	58538	-	0.9603	822	NA	NA	NA	NA		between	pRL27	TagModule_0016			NA
81988	6	D11	139	3011179	-	0.9779	589	NA	NA	NA	NA		between	pRL27	TagModule_0025			NA
81989	6	D12	140	51172	-	0.9275	337	NA	NA	203887	244	+	gene	pRL27	TagModule_0072	SOA0063		3316	ISSod8, transposase (NCBI ptt file)
81990	6	E01	139	3760123	+	0.9662	614	NA	NA	202695	704	-	gene	pRL27	TagModule_0005	SO3598	cysM	31	cysteine synthase B (NCBI ptt file)
81991	6	E02	140	81724	-	0.9753	885	0.9697	885	NA	NA		between	pRL27	TagModule_0006			NA
81992	6	E03	139	1931908	-	1	379	NA	NA	201004	564	+	gene	pRL27	TagModule_0007	SO1842		NA	hypothetical protein (NCBI ptt file)
81993	6	E04	139	389316	-	0.9903	718	NA	NA	199570	147	+	gene	pRL27	TagModule_0009	SO0377		NA	hypothetical protein (NCBI ptt file)
81994	6	E05	139	965922	+	0.996	746	NA	NA	200118	465	+	gene	pRL27	TagModule_0009	SO0934		3137	conserved hypothetical protein (NCBI ptt file)
81995	6	E06	139	3526950	-	0.983	754	NA	NA	202496	720	-	gene	pRL27	TagModule_0005	SO3388		513	ATP-dependent RNA helicase, DEAD box family (NCBI ptt file)
81996	6	E07	139	4555262	+	0.9971	344	NA	NA	203437	331	-	gene	pRL27	TagModule_0012	SO4359		NA	outer membrane protein, putative (NCBI ptt file)
81997	6	E08	139	4794516	+	0.9884	855	NA	NA	203670	613	-	gene	pRL27	TagModule_0013	SO4600		3324	antigen, putative (NCBI ptt file)
81998	6	E09	139	2238337	-	0.9877	241	NA	NA	201289	36	+	gene	pRL27	TagModule_0016	SO2132		NA	hypothetical protein (NCBI ptt file)
81999	6	E10	139	4634748	-	0.9486	467	NA	NA	203520	1978	+	gene	pRL27	TagModule_0016	SO4445		642	response regulator/sensor histidine kinase (NCBI ptt file)
82000	6	E11	139	4344493	+	0.9794	864	NA	NA	203254	141	-	gene	pRL27	TagModule_0072	SO4171		NA	hypothetical protein (NCBI ptt file)
82001	6	E12	139	3665180	-	1	732	NA	NA	202613	259	-	gene	pRL27	TagModule_0072	SO3512		NA	conserved hypothetical protein (NCBI ptt file)
82002	6	F01	140	135614	-	0.9805	711	NA	NA	2200911	136	+	gene	pRL27	TagModule_0005	SO_A0183		NA	hypothetical protein (NCBI)
82003	6	F02	139	2425768	+	0.9647	535	NA	NA	201463	304	+	gene	pRL27	TagModule_0006	SO2315		2801	ISSod1, transposase OrfB (NCBI ptt file)	YES	YES
82004	6	F03	139	4898489	+	0.9939	654	NA	NA	NA	NA		between	pRL27	TagModule_0007			NA
82005	6	F04	139	1201179	-	0.994	836	NA	NA	200336	1975	+	gene	pRL27	TagModule_0009	SO1156		1629	TonB-dependent receptor (NCBI ptt file)
82006	6	F05	139	1062140	+	1	129	1	85	NA	NA		between	pRL27	TagModule_0009			NA
82007	6	F06	139	1446005	+	0.9856	755	NA	NA	200563	367	-	gene	pRL27	TagModule_0005	SO1388		6	aminopeptidase P, putative (NCBI ptt file)
82008	6	F07	139	2397212	-	0.9881	670	0.991	664	NA	NA		between	pRL27	TagModule_0012			NA
82009	6	F08	139	2356598	+	0.9565	831	NA	NA	201390	858	-	gene	pRL27	TagModule_0013	SO2240		840	methyl-accepting chemotaxis protein (NCBI ptt file)
82010	6	F09	139	1606301	+	0.9872	704	NA	NA	NA	NA		between	pRL27	TagModule_0016			NA
82011	6	F10	139	4465904	+	0.9604	625	NA	NA	203365	739	-	gene	pRL27	TagModule_0016	SO4286	motB	1360	chemotaxis motB protein (NCBI ptt file)
82012	6	F11	139	2912462	-	0.9855	815	NA	NA	201922	264	+	gene	pRL27	TagModule_0072	SO2790	sbcB	2925	exodeoxyribonuclease I (NCBI ptt file)
82013	6	F12	139	2006159	-	0.9792	622	NA	NA	201068	841	-	gene	pRL27	TagModule_0072	SO1907		583	transcriptional regulator, LysR family (NCBI ptt file)
82014	6	G01	139	462864	+	0.9826	799	NA	NA	199629	1653	+	gene	pRL27	TagModule_0005	SO0437		5001	sensory box protein (NCBI ptt file)
82015	6	G02	139	1291458	-	0.9826	688	NA	NA	200417	55	-	gene	pRL27	TagModule_0006	SO1239		2908	conserved hypothetical protein (NCBI ptt file)
82016	6	G03	139	4727913	-	0.9522	414	NA	NA	203607	348	-	gene	pRL27	TagModule_0007	SO4535		NA	hypothetical protein (NCBI ptt file)	YES
82017	6	G04	140	17772	+	1	434	NA	NA	NA	NA		between	pRL27	TagModule_0009			NA
82018	6	G05	140	52768	-	0.9727	436	0.9727	436	NA	NA		between	pRL27	TagModule_0009			NA
82019	6	G06	139	290266	+	0.9886	440	NA	NA	199477	437	+	gene	pRL27	TagModule_0005	SO0282		3166	type IV pilus biogenesis protein PilN (NCBI ptt file)
82020	6	G07	140	62463	+	0.9832	415	NA	NA	203902	132	-	gene	pRL27	TagModule_0012	SO_A0080		NA	hypothetical protein (NCBI)
82021	6	G08	139	1845417	-	0.9632	945	0.9562	928	NA	NA		between	pRL27	TagModule_0013			NA
82022	6	G09	139	4017541	-	1	636	NA	NA	202957	97	-	gene	pRL27	TagModule_0016	SO3871		NA	thiol:disulfide interchange protein, DsbA family (NCBI ptt file)
82023	6	G10	139	4762041	-	0.9822	732	NA	NA	203636	752	-	gene	pRL27	TagModule_0016	SO_4565		531	transporter, putative (VIMSS)	YES	YES
82024	6	G11	139	3823155	-	0.9757	940	NA	NA	202764	464	-	gene	pRL27	TagModule_0072	SO3669	hugA	4771	heme transport protein (NCBI ptt file)
82025	6	G12	139	377238	+	0.978	410	NA	NA	199561	707	-	gene	pRL27	TagModule_0072	SO0366		NA	hypothetical protein (NCBI ptt file)	YES	YES
82026	6	H01	139	4775879	-	0.9792	574	NA	NA	NA	NA		between	pRL27	TagModule_0005			NA
82027	6	H02	139	2965158	-	0.9973	371	NA	NA	NA	NA		between	pRL27	TagModule_0006			NA
82028	6	H03	139	3350584	-	0.9729	588	NA	NA	202319	284	-	gene	pRL27	TagModule_0007	SO3210	fliA	1191	RNA polymerase sigma-27 factor (NCBI ptt file)
82029	6	H04	139	4313939	+	0.9968	308	NA	NA	203232	4338	+	gene	pRL27	TagModule_0009	SO4149		NA	RTX toxin, putative (NCBI ptt file)
82030	6	H05	139	186399	+	0.9447	450	NA	NA	199378	4	+	gene	pRL27	TagModule_0009	SO0181		NA	hypothetical protein (NCBI ptt file)
82031	6	H06	140	41955	-	0.9599	345	NA	NA	203874	405	-	gene	pRL27	TagModule_0005	SOA0050		1566	toxin secretion, membrane fusion protein (NCBI ptt file)
82032	6	H07	139	1610220	+	0.9948	384	NA	NA	200705	156	+	gene	pRL27	TagModule_0012	SO1535		2363	conserved hypothetical protein (NCBI ptt file)
82033	6	H09	139	3947428	-	0.9898	488	NA	NA	202885	2243	+	gene	pRL27	TagModule_0016	SO3794		2849	conserved domain protein (NCBI ptt file)
82034	6	H11	140	136348	-	0.9775	267	NA	NA	NA	NA		between	pRL27	TagModule_0072			NA
82035	6	H12	139	4191421	+	1	351	NA	NA	203118	1844	+	gene	pRL27	TagModule_0072	SO4034	deaD	513	ATP-dependent RNA helicase DeaD (NCBI ptt file)
82670	7	A01	139	2675460	+	0.9952	414	NA	NA	201683	861	+	gene	pRL27	TagModule_0049	SO2543		NA	sensor histidine kinase (NCBI ptt file)
82671	7	A02	139	4556327	+	0.9946	558	NA	NA	203438	192	-	gene	pRL27	TagModule_0050	SO4360		NA	decaheme cytochrome c (NCBI ptt file)
82672	7	A03	139	3318675	-	0.9613	489	NA	NA	NA	NA		between	pRL27	TagModule_0051			NA
82673	7	A04	139	2284791	-	0.9917	838	NA	NA	NA	NA		between	pRL27	TagModule_0052			NA
82674	7	A05	139	2103812	+	0.9922	387	NA	NA	201164	109	+	gene	pRL27	TagModule_0053	SO2004		NA	TonB-dependent receptor C-terminal region domain protein (NCBI ptt file)		YES
82675	7	A06	139	2700333	+	0.9985	647	NA	NA	201710	644	-	gene	pRL27	TagModule_0054	SO2570		4805	lipoprotein, putative (NCBI ptt file)
82676	7	A07	139	4854639	+	0.987	835	NA	NA	370256	1390	-	gene	pRL27	TagModule_0055	SO4656.2		3614	conserved hypothetical protein (NCBI ptt file)
82677	7	A08	139	983623	+	0.9787	877	NA	NA	NA	NA		between	pRL27	TagModule_0056			NA
82678	7	A09	139	2253707	+	0.9707	476	NA	NA	201302	1942	-	gene	pRL27	TagModule_0057	SO2147	recD	507	exodeoxyribonuclease V, alpha subunit (NCBI ptt file)		YES
82679	7	A10	139	4554349	+	0.9768	474	NA	NA	203437	1244	-	gene	pRL27	TagModule_0058	SO4359		NA	outer membrane protein, putative (NCBI ptt file)
82680	7	A11	139	1803189	+	0.9892	369	NA	NA	NA	NA		between	pRL27	TagModule_0059			NA
82681	7	B01	139	4787865	-	0.9841	744	NA	NA	NA	NA		between	pRL27	TagModule_0049			NA
82682	7	B02	139	2630201	-	1	547	NA	NA	201647	1535	-	gene	pRL27	TagModule_0050	SO2506	uvrB	556	excinuclease ABC, B subunit (NCBI ptt file)	YES
82683	7	B04	139	2625041	+	0.9705	710	NA	NA	201639	338	-	gene	pRL27	TagModule_0052	SO2498		2200	sensory box protein (NCBI ptt file)
82684	7	B05	139	4165397	+	0.9942	853	NA	NA	203102	1011	-	gene	pRL27	TagModule_0053	SO4018		NA	hypothetical protein (NCBI ptt file)
82685	7	B06	139	4786363	+	0.9616	820	NA	NA	203662	27	+	gene	pRL27	TagModule_0054	SO4592		NA	hypothetical protein (NCBI ptt file)
82686	7	B07	139	927621	-	0.9675	553	NA	NA	200085	855	-	gene	pRL27	TagModule_0055	SO0900		667	oxidoreductase, aldo/keto reductase family (NCBI ptt file)
82687	7	B08	139	475082	-	0.9883	684	NA	NA	199639	29	+	gene	pRL27	TagModule_0056	SO0447		NA	hypothetical protein (NCBI ptt file)	YES
82688	7	B09	139	3442733	+	0.9503	499	NA	NA	202406	883	-	gene	pRL27	TagModule_0057	SO3298		NA	conserved hypothetical protein (NCBI ptt file)
82689	7	B10	139	417391	-	0.9813	532	NA	NA	199596	80	+	gene	pRL27	TagModule_0058	SO0403		NA	hypothetical protein (NCBI ptt file)		YES
82690	7	B11	139	388468	+	0.9475	618	NA	NA	NA	NA		between	pRL27	TagModule_0059			NA
82691	7	B12	139	1133403	+	0.9677	62	NA	NA	NA	NA		between	pRL27	TagModule_0060			NA
82692	7	C01	139	350845	+	0.9791	893	NA	NA	199539	510	-	gene	pRL27	TagModule_0049	SO0344	prpC	372	methylcitrate synthase (NCBI ptt file)	YES	YES
82693	7	C02	139	2243738	+	0.9862	796	NA	NA	201293	1089	-	gene	pRL27	TagModule_0050	SO2136	adhE	1454	aldehyde-alcohol dehydrogenase (NCBI ptt file)
82694	7	C03	139	2280452	+	0.9909	551	NA	NA	NA	NA		between	pRL27	TagModule_0051			NA
82695	7	C04	139	1062110	-	0.9902	509	0.9902	509	NA	NA		between	pRL27	TagModule_0052			NA
82696	7	C05	139	2931902	-	0.9959	731	NA	NA	NA	NA		between	pRL27	TagModule_0053			NA
82697	7	C06	139	2003857	-	0.9893	922	NA	NA	NA	NA		between	pRL27	TagModule_0054			NA
82698	7	C07	139	1506017	-	1	70	NA	NA	200614	1080	+	gene	pRL27	TagModule_0055	SO1442		NA	conserved hypothetical protein (NCBI ptt file)
82699	7	C08	139	895845	-	0.9938	479	NA	NA	NA	NA		between	pRL27	TagModule_0056			NA
82700	7	C09	139	309930	+	0.9953	429	NA	NA	199499	540	+	gene	pRL27	TagModule_0057	SO0304		NA	hypothetical endonuclease (NCBI ptt file)
82701	7	C10	139	301092	-	0.9448	578	NA	NA	NA	NA		between	pRL27	TagModule_0058			NA
82702	7	C11	139	3784746	-	0.9545	592	NA	NA	202721	360	-	gene	pRL27	TagModule_0059	SO3624		1053	flavocytochrome c flavin subunit (NCBI ptt file)
82703	7	C12	139	268920	+	0.9218	356	NA	NA	199464	231	+	gene	pRL27	TagModule_0060	SO0269		526	thioredoxin, putative (NCBI ptt file)	YES	YES
82704	7	D01	139	2514540	+	0.9798	837	NA	NA	NA	NA		between	pRL27	TagModule_0049			NA
82705	7	D02	139	1628314	+	0.9037	319	NA	NA	200720	1651	-	gene	pRL27	TagModule_0050	SO1552		NA	TPR domain protein (NCBI ptt file)
82706	7	D03	140	136529	+	1	389	NA	NA	NA	NA		between	pRL27	TagModule_0051			NA
82707	7	D04	139	4558126	-	0.9668	837	NA	NA	NA	NA		between	pRL27	TagModule_0052			NA
82708	7	D05	139	728755	-	0.9909	548	NA	NA	199898	499	-	gene	pRL27	TagModule_0053	SO0710		NA	hypothetical protein (NCBI ptt file)
82709	7	D06	139	4624124	+	0.9973	367	NA	NA	NA	NA		between	pRL27	TagModule_0054			NA
82710	7	D07	139	2566261	+	0.9553	923	NA	NA	201594	1291	+	gene	pRL27	TagModule_0055	SO2450	susB	NA	alpha-glucosidase (NCBI ptt file)		YES
82711	7	D08	139	4461526	-	0.9986	739	NA	NA	203361	297	+	gene	pRL27	TagModule_0056	SO4282	ktrB	168	potassium uptake protein KtrB (NCBI ptt file)
82712	7	D09	139	4881107	+	1	714	NA	NA	NA	NA		between	pRL27	TagModule_0057			NA
82713	7	D10	140	44382	+	0.9923	645	NA	NA	NA	NA		between	pRL27	TagModule_0058			NA
82714	7	D11	139	1964713	+	0.9845	710	NA	NA	201033	801	+	gene	pRL27	TagModule_0059	SO1871		NA	S-adenosylmethionine decarboxylase proenzyme, putative (NCBI ptt file)		YES
82715	7	E01	139	4555392	+	1	471	NA	NA	203437	201	-	gene	pRL27	TagModule_0049	SO4359		NA	outer membrane protein, putative (NCBI ptt file)
82716	7	E02	139	3788161	+	0.9542	583	NA	NA	NA	NA		between	pRL27	TagModule_0050			NA
82717	7	E03	139	2101808	-	1	481	NA	NA	NA	NA		between	pRL27	TagModule_0051			NA
82718	7	E04	139	1543048	-	0.9758	577	NA	NA	200651	888	+	gene	pRL27	TagModule_0052	SO1480		2199	GGDEF family protein (NCBI ptt file)
82719	7	E05	139	2164619	-	0.9711	923	NA	NA	201224	111	-	gene	pRL27	TagModule_0053	SO2067	hisI	139	phosphoribosyl-ATP pyrophosphatase/phosphoribosyl-AMP cyclohydrolase (NCBI ptt file)
82720	7	E06	139	4017542	+	0.9866	674	NA	NA	202957	96	-	gene	pRL27	TagModule_0054	SO3871		NA	thiol:disulfide interchange protein, DsbA family (NCBI ptt file)
82721	7	E07	139	4330902	+	0.9818	757	NA	NA	203238	917	-	gene	pRL27	TagModule_0055	SO4155		NA	sensor histidine kinase (NCBI ptt file)
82722	7	E08	139	3317680	+	0.9961	507	NA	NA	202289	754	-	gene	pRL27	TagModule_0056	SO3179		NA	lipopolysaccharide biosynthesis polymerase, putative (NCBI ptt file)
82723	7	E09	139	4440943	+	0.9897	387	NA	NA	203345	170	-	gene	pRL27	TagModule_0057	SO4264	hsdS-2	732	type I restriction-modification system, S subunit (NCBI ptt file)
82724	7	E10	140	97177	-	0.9945	544	0.9945	544	NA	NA		between	pRL27	TagModule_0058			NA
82725	7	E11	139	1588166	-	0.9909	438	NA	NA	200684	26	+	gene	pRL27	TagModule_0059	SO1513		NA	hypothetical protein (NCBI ptt file)	YES
82726	7	F01	139	4481762	-	0.9845	956	NA	NA	203382	76	+	gene	pRL27	TagModule_0049	SO4303		NA	hypothetical protein (NCBI ptt file)
82727	7	F02	139	4581649	+	0.9937	634	NA	NA	203463	1328	+	gene	pRL27	TagModule_0050	SO4385		2304	von Willebrand factor type A domain protein (NCBI ptt file)
82728	7	F03	139	1066497	-	0.9982	546	NA	NA	NA	NA		between	pRL27	TagModule_0051			NA
82729	7	F04	139	1695183	-	0.9977	435	NA	NA	200777	188	-	gene	pRL27	TagModule_0052	SO1611		NA	hypothetical protein (NCBI ptt file)		YES
82730	7	F05	139	4556131	-	0.9781	772	NA	NA	203438	388	-	gene	pRL27	TagModule_0053	SO4360		NA	decaheme cytochrome c (NCBI ptt file)
82731	7	F06	139	757600	+	0.968	830	NA	NA	NA	NA		between	pRL27	TagModule_0054			NA
82732	7	F07	139	2103306	+	1	557	NA	NA	NA	NA		between	pRL27	TagModule_0055			NA
82733	7	F08	140	133640	-	0.9932	290	0.9932	290	NA	NA		between	pRL27	TagModule_0056			NA
82734	7	F09	139	4817587	+	0.9395	343	NA	NA	203691	172	-	gene	pRL27	TagModule_0057	SO4621		NA	hypothetical protein (NCBI ptt file)
82735	7	F10	139	4434653	+	0.9689	575	NA	NA	203339	347	+	gene	pRL27	TagModule_0058	SO4258		NA	site-specific recombinase, phage integrase family (NCBI ptt file)
82736	7	F11	139	4746782	-	0.9569	510	NA	NA	203621	434	-	gene	pRL27	TagModule_0059	SO4550		NA	methyltransferase domain protein (NCBI ptt file)
82737	7	F12	139	2356570	-	0.919	466	NA	NA	201390	886	-	gene	pRL27	TagModule_0060	SO2240		840	methyl-accepting chemotaxis protein (NCBI ptt file)
82738	7	G01	140	117243	-	1	351	NA	NA	NA	NA		between	pRL27	TagModule_0049			NA
82739	7	G02	139	907549	-	0.9903	917	NA	NA	200063	456	+	gene	pRL27	TagModule_0050	SO0877		456	acetyltransferase, GNAT family (NCBI ptt file)		YES
82740	7	G03	139	2487592	+	0.9972	713	NA	NA	201529	241	+	gene	pRL27	TagModule_0051	SO2385		3211	conserved hypothetical protein (NCBI ptt file)	YES	YES
82741	7	G04	139	501934	+	0.9724	214	NA	NA	199669	194	-	gene	pRL27	TagModule_0052	SO0478	ccmF-2	1138	cytochrome c-type biogenesis protein CcmF (NCBI ptt file)
82742	7	G05	139	3728299	-	0.9659	670	NA	NA	202666	729	+	gene	pRL27	TagModule_0053	SO3565	cpdB	737	2',3'-cyclic-nucleotide 2'-phosphodiesterase (NCBI ptt file)	YES
82743	7	G06	140	7036	-	0.9767	559	NA	NA	NA	NA		between	pRL27	TagModule_0054			NA
82744	7	G07	139	614724	+	0.951	508	NA	NA	199778	1599	-	gene	pRL27	TagModule_0055	SO0588		3264	transporter, putative (NCBI ptt file)
82745	7	G08	139	1988658	+	0.9973	364	NA	NA	NA	NA		between	pRL27	TagModule_0056			NA
82746	7	G09	140	91379	+	0.9917	717	0.9917	717	NA	NA		between	pRL27	TagModule_0057			NA
82747	7	G10	139	3282390	-	0.9634	380	NA	NA	202255	38	-	gene	pRL27	TagModule_0058	SO3145	etfB	2086	electron transfer flavoprotein, beta subunit (NCBI ptt file)	YES
82748	7	G11	139	1541390	+	0.9895	764	NA	NA	200649	264	+	gene	pRL27	TagModule_0059	SO1478		NA	methylase, putative (NCBI ptt file)
82749	7	G12	139	4436517	+	0.9304	503	0.9207	454	NA	NA		between	pRL27	TagModule_0060			NA
82750	7	H01	139	4466332	+	0.9941	505	NA	NA	203365	311	-	gene	pRL27	TagModule_0049	SO4286	motB	1360	chemotaxis motB protein (NCBI ptt file)
82751	7	H02	139	4558274	-	1	126	NA	NA	203442	23	+	gene	pRL27	TagModule_0050	SO4364	recG	1200	ATP-dependent DNA helicase RecG (NCBI ptt file)
82752	7	H03	139	3282436	-	1	62	NA	NA	NA	NA		between	pRL27	TagModule_0051			NA
82753	7	H04	139	4261296	-	1	522	NA	NA	203185	445	-	gene	pRL27	TagModule_0052	SO4101	mshP	NA	MSHA biogenesis protein MshP (NCBI ptt file)	YES
82754	7	H05	139	2486333	-	1	287	NA	NA	201528	275	+	gene	pRL27	TagModule_0053	SO2384		4974	site-specific recombinase, phage integrase family (NCBI ptt file)
82755	7	H06	139	985937	-	0.9858	141	NA	NA	200133	925	+	gene	pRL27	TagModule_0054	SO0949	brnQ	1114	branched-chain amino acid transport system II carrier protein BrnQ (NCBI ptt file)	YES
82756	7	H07	139	3095916	-	0.9923	392	NA	NA	202083	145	-	gene	pRL27	TagModule_0055	SO2960		NA	conserved hypothetical protein (NCBI ptt file)	YES
82757	7	H08	139	1992988	+	1	48	NA	NA	201057	390	-	gene	pRL27	TagModule_0056	SO1895		1024	enoyl-CoA hydratase/isomerase family protein (NCBI ptt file)		YES
82758	7	H09	139	3652508	+	1	527	NA	NA	202602	339	+	gene	pRL27	TagModule_0057	SO3501		3450	conserved hypothetical protein (NCBI ptt file)	YES
82759	7	H10	139	4463151	+	1	423	NA	NA	203362	552	+	gene	pRL27	TagModule_0058	SO4283		1477	apbE family protein (NCBI ptt file)
83635	8	A01	139	1080933	-	0.9942	171	NA	NA	200225	621	-	gene	pRL27	TagModule_0061	SO1042		1126	amino acid ABC transporter, ATP-binding protein (NCBI ptt file)
83636	8	A02	140	45000	-	0.9896	481	0.9896	481	NA	NA		between	pRL27	TagModule_0062			NA
83637	8	A03	139	4601622	+	0.9801	501	NA	NA	203485	1054	-	gene	pRL27	TagModule_0063	SO4408	bipA	1217	virulence regulator BipA (NCBI ptt file)
83638	8	A04	139	376990	+	1	751	NA	NA	199560	1303	+	gene	pRL27	TagModule_0064	SO0365		NA	hypothetical permeases of the major facilitator superfamily (NCBI ptt file)
83639	8	A05	139	1131051	+	0.995	602	NA	NA	200273	380	+	gene	pRL27	TagModule_0065	SO1092		2207	transcriptional regulator, AraC/XylS family (NCBI ptt file)		YES
83640	8	A06	139	2917275	-	0.9585	832	NA	NA	201928	114	+	gene	pRL27	TagModule_0066	SO2796		NA	conserved hypothetical protein (NCBI ptt file)
83641	8	A07	139	1568584	-	0.9585	550	NA	NA	200669	1188	+	gene	pRL27	TagModule_0067	SO1498	glgC	448	glucose-1-phosphate adenylyltransferase (NCBI ptt file)	YES
83642	8	A08	139	783723	+	0.9774	611	NA	NA	199956	258	+	gene	pRL27	TagModule_0068	SO0770	mdh	39	malate dehydrogenase (NCBI ptt file)
83643	8	A10	140	62698	-	0.9856	893	NA	NA	NA	NA		between	pRL27	TagModule_0070			NA
83644	8	A11	139	4821251	+	0.9905	630	NA	NA	203695	102	-	gene	pRL27	TagModule_0071	SO4625	comF	1040	competence protein ComF (NCBI ptt file)
83645	8	B01	139	4715561	-	0.9948	574	NA	NA	203594	1154	+	gene	pRL27	TagModule_0061	SO4520		635	oxygen-independent coproporphyrinogen III oxidase, putative (NCBI ptt file)
83646	8	B02	139	4124105	-	0.9784	914	NA	NA	203070	310	-	gene	pRL27	TagModule_0062	SO3986	lysC	527	aspartokinase III, lysine-sensitive (NCBI ptt file)	YES
83647	8	B04	140	54727	+	0.9931	725	NA	NA	203890	655	-	gene	pRL27	TagModule_0064	SOA0067		NA	hypothetical protein (NCBI ptt file)	YES
83648	8	B05	140	59477	-	0.9985	682	NA	NA	203896	15	-	gene	pRL27	TagModule_0065	SOA0074		3293	ISSod6, transposase (NCBI ptt file)
83649	8	B06	139	4077588	+	0.9377	305	NA	NA	203018	303	+	gene	pRL27	TagModule_0066	SO3933		NA	membrane protein, putative (NCBI ptt file)
83650	8	B07	139	651379	-	0.9944	713	NA	NA	199812	1	-	gene	pRL27	TagModule_0067	SO0624	crp	664	catabolite gene activator (NCBI ptt file)
83651	8	B08	139	797716	-	1	520	NA	NA	199969	1693	-	gene	pRL27	TagModule_0068	SO0783		3972	hypothetical protein (NCBI ptt file)
83652	8	B09	139	3971651	-	0.9976	816	NA	NA	202910	926	-	gene	pRL27	TagModule_0069	SO3821		2200	rtn protein (NCBI ptt file)		YES
83653	8	B10	139	3786730	-	0.9984	633	NA	NA	202724	68	+	gene	pRL27	TagModule_0070	SO3627		1309	transcriptional regulator, TetR family (NCBI ptt file)
83654	8	B11	139	2069037	+	0.9957	690	NA	NA	201124	794	-	gene	pRL27	TagModule_0071	SO1963		3508	conserved hypothetical protein (NCBI ptt file)
83655	8	B12	139	4463151	+	1	425	NA	NA	203362	552	+	gene	pRL27	TagModule_0072	SO4283		1477	apbE family protein (NCBI ptt file)
83656	8	C01	139	1279007	+	0.9924	522	NA	NA	200408	933	+	gene	pRL27	TagModule_2154	SO1230	torS	642	sensor histidine kinase/response regulator TorS (NCBI ptt file)
83657	8	C02	139	3150609	+	1	243	0.913	68	NA	NA		between	pRL27	TagModule_0062			NA
83658	8	C03	139	290728	-	0.9781	895	NA	NA	199478	318	+	gene	pRL27	TagModule_0063	SO0283		3167	type IV pilus biogenesis protein PilO (NCBI ptt file)
83659	8	C04	139	1670371	+	0.9768	561	NA	NA	200766	5833	-	gene	pRL27	TagModule_0064	SO1599		NA	multi-domain beta-ketoacyl synthase (NCBI ptt file)
83660	8	C05	139	3963250	-	0.983	700	NA	NA	202900	425	-	gene	pRL27	TagModule_0065	SO3810		NA	OmpA-like transmembrane domain protein (NCBI ptt file)	YES
83661	8	C06	139	3206977	-	0.9912	900	NA	NA	202201	1942	+	gene	pRL27	TagModule_0066	SO3084		5001	sensory box protein (NCBI ptt file)
83662	8	C07	139	112355	-	0.9951	610	NA	NA	199299	635	+	gene	pRL27	TagModule_0067	SO0102	fdnH	437	formate dehydrogenase, nitrate-inducible, iron-sulfur subunit (NCBI ptt file)
83663	8	C08	139	24167	+	0.9677	678	NA	NA	199217	303	-	gene	pRL27	TagModule_0068	SO0020	fadA	183	fatty oxidation complex, beta subunit (NCBI ptt file)
83664	8	C09	139	4463142	-	0.9912	563	NA	NA	203362	543	+	gene	pRL27	TagModule_0069	SO4283		1477	apbE family protein (NCBI ptt file)
83665	8	C10	139	811247	+	0.9829	521	NA	NA	199984	1402	-	gene	pRL27	TagModule_0070	SO0798		4771	conserved hypothetical protein (NCBI ptt file)
83666	8	C11	139	3550740	-	0.9752	720	NA	NA	202518	476	-	gene	pRL27	TagModule_0071	SO3411		4946	protease, putative (NCBI ptt file)
83667	8	C12	140	133659	-	0.9853	271	0.9853	271	NA	NA		between	pRL27	TagModule_0072			NA
83668	8	D01	139	357205	-	0.9763	870	NA	NA	199544	24	-	gene	pRL27	TagModule_0061	SO0349		606	magnesium chelatase family protein (NCBI ptt file)
83669	8	D02	139	3479724	-	0.9581	616	NA	NA	202441	403	+	gene	pRL27	TagModule_0062	SO3333		1653	transporter, putative (NCBI ptt file)		YES
83670	8	D03	139	4121114	-	0.9762	710	NA	NA	203068	205	+	gene	pRL27	TagModule_0063	SO3984		598	magnesium transporter, putative (NCBI ptt file)
83671	8	D04	140	64038	-	0.9957	466	0.9871	466	NA	NA		between	pRL27	TagModule_0064			NA
83672	8	D05	139	621753	-	0.9898	488	NA	NA	199783	471	+	gene	pRL27	TagModule_0065	SO0595		NA	hypothetical protein (NCBI ptt file)
83673	8	D06	139	3479112	+	1	262	NA	NA	202440	396	+	gene	pRL27	TagModule_0066	SO3332		NA	transcriptional regulator, CopG family (NCBI ptt file)	YES
83674	8	D07	139	495607	+	0.9946	366	NA	NA	199663	74	+	gene	pRL27	TagModule_0067	SO0471		2070	hypothetical dioxygenase (NCBI ptt file)
83675	8	D08	139	1459377	-	1	488	NA	NA	200578	496	-	gene	pRL27	TagModule_0068	SO1403		3681	conserved hypothetical protein (NCBI ptt file)	YES
83676	8	D09	139	320942	-	1	72	NA	NA	199509	1446	-	gene	pRL27	TagModule_0069	SO0314	speF	1982	ornithine decarboxylase, inducible (NCBI ptt file)
83677	8	D10	139	202861	-	0.9961	769	NA	NA	199390	447	+	gene	pRL27	TagModule_0070	SO0193		NA	transcriptional regulator, TetR family (NCBI ptt file)
83678	8	D11	140	25930	-	0.9742	653	NA	NA	203858	176	+	gene	pRL27	TagModule_0071	SOA0034		NA	hypothetical protein (NCBI ptt file)		YES
83679	8	D12	139	3049113	+	0.9765	718	NA	NA	202040	1943	+	gene	pRL27	TagModule_0072	SO2916	pta	280	phosphate acetyltransferase (NCBI ptt file)
83680	8	E01	140	132554	-	0.9834	481	0.9834	481	NA	NA		between	pRL27	TagModule_0061			NA
83681	8	E02	139	4059559	+	0.9625	427	NA	NA	202999	1526	-	gene	pRL27	TagModule_0062	SO3914		4774	TonB-dependent receptor, putative (NCBI ptt file)
83682	8	E03	140	37167	-	1	257	NA	NA	203872	677	-	gene	pRL27	TagModule_0063	SOA0048		1506	prolyl oligopeptidase family protein (NCBI ptt file)
83683	8	E04	139	3203179	-	0.9796	393	NA	NA	202200	1218	+	gene	pRL27	TagModule_0064	SO3083		1025	peptidase, M16 family (NCBI ptt file)
83684	8	E05	140	41963	+	0.9861	501	NA	NA	203874	397	-	gene	pRL27	TagModule_0065	SOA0050		1566	toxin secretion, membrane fusion protein (NCBI ptt file)
83685	8	E06	139	4021304	+	0.9975	392	NA	NA	202960	85	+	gene	pRL27	TagModule_0066	SO3874		583	transcriptional regulator, LysR family (NCBI ptt file)
83686	8	E07	139	4463142	-	0.9925	398	NA	NA	203362	543	+	gene	pRL27	TagModule_0067	SO4283		1477	apbE family protein (NCBI ptt file)
83687	8	E08	139	3251280	-	1	719	NA	NA	202238	446	-	gene	pRL27	TagModule_0068	SO3123	cheV-2	835	chemotaxis protein CheV (NCBI ptt file)
83688	8	E09	140	127783	-	0.9849	395	NA	NA	203945	1367	+	gene	pRL27	TagModule_0069	SOA0140		NA	hypothetical protein (NCBI ptt file)
83689	8	E10	139	4909246	+	0.9831	708	NA	NA	203775	353	+	gene	pRL27	TagModule_0070	SO4706		NA	malate synthase domain protein (NCBI ptt file)
83690	8	E11	139	678517	-	0.9891	645	NA	NA	NA	NA		between	pRL27	TagModule_0071			NA
83691	8	E12	139	678278	+	0.9985	676	NA	NA	199842	344	+	gene	pRL27	TagModule_0071	SO0654		NA	hypothetical protein (NCBI ptt file)
83692	8	F01	139	4020157	+	1	674	NA	NA	202959	257	+	gene	pRL27	TagModule_0061	SO3873		NA	hypothetical protein (NCBI ptt file)	YES	YES
83693	8	F02	139	3751543	-	0.9833	718	NA	NA	202681	62	-	gene	pRL27	TagModule_0062	SO3584		2345	conserved hypothetical protein (NCBI ptt file)
83694	8	F03	140	106019	+	0.9814	693	NA	NA	203929	488	+	gene	pRL27	TagModule_0063	SOA0118		NA	conserved domain protein (NCBI ptt file)
83695	8	F04	140	133828	-	1	132	1	132	NA	NA		between	pRL27	TagModule_0064			NA
83696	8	F05	139	4908790	-	0.9523	946	NA	NA	NA	NA		between	pRL27	TagModule_0065			NA
83697	8	F06	140	115303	-	0.9899	197	0.9899	197	NA	NA		between	pRL27	TagModule_0066			NA
83698	8	F07	139	4765968	+	1	84	NA	NA	203641	351	-	gene	pRL27	TagModule_0067	SO4571		583	transcriptional regulator, LysR family (NCBI ptt file)
83699	8	F08	139	4201525	+	1	413	NA	NA	203131	299	-	gene	pRL27	TagModule_0068	SO4047		3258	cytochrome c family protein (NCBI ptt file)
83700	8	F09	139	4016107	-	0.9262	120	NA	NA	NA	NA		between	pRL27	TagModule_0069			NA
83701	8	F10	139	502866	-	1	438	NA	NA	199670	228	+	gene	pRL27	TagModule_0070	SO0479		NA	cytochrome c, putative (NCBI ptt file)
83702	8	F11	139	1062198	+	1	187	1	143	NA	NA		between	pRL27	TagModule_0071			NA
83703	8	F12	139	92104	+	0.9844	634	NA	NA	199275	708	-	gene	pRL27	TagModule_0071	SO0078		NA	hypothetical protein (NCBI ptt file)
83704	8	G01	139	3389873	-	1	200	NA	NA	202360	825	-	gene	pRL27	TagModule_0061	SO3252	cheV-3	835	chemotaxis protein CheV (NCBI ptt file)
83705	8	G02	139	1121607	+	1	295	NA	NA	NA	NA		between	pRL27	TagModule_0062			NA
83706	8	G03	139	3006813	+	0.9956	451	NA	NA	202010	1230	+	gene	pRL27	TagModule_0063	SO2884		2719	conserved hypothetical protein (NCBI ptt file)
83707	8	G04	140	55341	-	0.9785	651	NA	NA	203890	41	-	gene	pRL27	TagModule_0064	SOA0067		NA	hypothetical protein (NCBI ptt file)		YES
83708	8	G05	139	4021987	-	1	437	NA	NA	202960	768	+	gene	pRL27	TagModule_0065	SO3874		583	transcriptional regulator, LysR family (NCBI ptt file)
83709	8	G06	139	3445727	+	0.9885	344	NA	NA	202408	159	-	gene	pRL27	TagModule_0066	SO3300		NA	cytochrome c (NCBI ptt file)
83710	8	G07	139	4775879	-	0.9909	876	NA	NA	NA	NA		between	pRL27	TagModule_0067			NA
83711	8	G08	139	3316990	+	0.9981	528	NA	NA	202288	171	-	gene	pRL27	TagModule_0068	SO3178		NA	hypothetical protein (NCBI ptt file)
83712	8	G09	139	4467583	-	1	206	NA	NA	203367	601	-	gene	pRL27	TagModule_0069	SO4288		3932	exopolysaccharide synthesis protein, putative (NCBI ptt file)	YES
83713	8	G10	139	929616	+	0.9643	448	NA	NA	200087	686	+	gene	pRL27	TagModule_0070	SO0902	nqrA-1	1726	NADH:ubiquinone oxidoreductase, Na translocating, alpha subunit (NCBI ptt file)
83714	8	G11	139	496373	+	0.9949	783	NA	NA	199663	840	+	gene	pRL27	TagModule_0071	SO0471		2070	hypothetical dioxygenase (NCBI ptt file)
83715	8	G12	139	2590055	-	0.986	429	NA	NA	201610	309	+	gene	pRL27	TagModule_0071	SO2469		4206	hypothetical TonB-dependent receptor (NCBI ptt file)
83716	8	H01	139	134596	+	1	182	NA	NA	199324	1292	-	gene	pRL27	TagModule_0061	SO0127		NA	hypothetical protein (NCBI ptt file)
83717	8	H02	139	4870919	-	1	257	NA	NA	NA	NA		between	pRL27	TagModule_0062			NA
83718	8	H03	140	116182	-	1	73	NA	NA	203938	336	-	gene	pRL27	TagModule_0063	SO_A0131		NA	hypothetical protein (NCBI)
83719	8	H04	139	3666427	-	0.9888	712	NA	NA	202614	571	-	gene	pRL27	TagModule_0064	SO3513		644	tryptophan halogenase, putative (NCBI ptt file)
83720	8	H05	139	3446189	+	0.9749	517	NA	NA	202409	1200	-	gene	pRL27	TagModule_0065	SO3301		1053	flavocytochrome c flavin subunit (NCBI ptt file)
83721	8	H06	139	2080048	+	0.9703	670	NA	NA	201136	129	+	gene	pRL27	TagModule_0066	SO1975		NA	Zinc carboxypeptidase-related protein (NCBI ptt file)		YES
83722	8	H07	139	1104387	+	0.9713	828	NA	NA	200247	195	+	gene	pRL27	TagModule_0067	SO1065	fkpA	545	FKBP-type peptidyl-prolyl cis-trans isomerase FkpA (NCBI ptt file)		YES
83723	8	H08	139	3387151	+	0.9728	841	NA	NA	202356	675	-	gene	pRL27	TagModule_0068	SO3248	flgD	1843	basal-body rod modification protein FlgD (NCBI ptt file)
83724	8	H09	139	2935610	-	0.9987	791	NA	NA	NA	NA		between	pRL27	TagModule_0069			NA
83725	8	H10	139	4784515	-	0.9684	757	NA	NA	203659	151	-	gene	pRL27	TagModule_0070	SO4589		4977	transcriptional regulator, AraC family (NCBI ptt file)	YES	YES
83726	8	H11	139	1449160	-	0.9554	359	NA	NA	200566	880	+	gene	pRL27	TagModule_0071	SO1391		2031	hypothetical Short chain fatty acid transporter (NCBI ptt file)
83727	8	H12	139	4553537	-	0.956	542	NA	NA	203436	67	-	gene	pRL27	TagModule_0071	SO4358	dmaA-2	243	anaerobic dimethyl sulfoxide reductase, A subunit (NCBI ptt file)
84592	9	A01	139	172705	-	0.9633	436	NA	NA	199363	404	+	gene	pRL27	TagModule_0073	SO0166	gspD	1450	general secretion pathway protein D (NCBI ptt file)
84593	9	A02	139	744459	+	0.9623	345	NA	NA	199918	1585	-	gene	pRL27	TagModule_0074	SO0730		NA	hypothetical protein (NCBI ptt file)
84594	9	A03	139	3039586	+	0.9254	268	NA	NA	NA	NA		between	pRL27	TagModule_0075			NA
84595	9	A05	139	4012675	-	0.9937	791	NA	NA	NA	NA		between	pRL27	TagModule_0077			NA
84596	9	A06	139	2676893	+	0.961	804	NA	NA	201684	928	+	gene	pRL27	TagModule_0078	SO2544		642	sensor histidine kinase/response regulator (NCBI ptt file)
84597	9	A07	139	1085387	+	0.9631	405	NA	NA	200230	160	+	gene	pRL27	TagModule_0079	SO1047		1380	conserved hypothetical protein (NCBI ptt file)	YES
84598	9	A09	139	3277586	-	0.9689	479	NA	NA	202253	1298	+	gene	pRL27	TagModule_0081	SO3142	dcp-1	339	peptidyl-dipeptidase Dcp (NCBI ptt file)	YES	YES
84599	9	A10	139	3628895	+	0.9901	603	NA	NA	NA	NA		between	pRL27	TagModule_0082			NA
84600	9	A11	139	4532191	+	1	456	NA	NA	NA	NA		between	pRL27	TagModule_0083			NA
84601	9	B01	139	4808805	-	0.9718	355	NA	NA	203684	748	+	gene	pRL27	TagModule_0073	SO4614	ctaB	109	protoheme IX farnesyltransferase (NCBI ptt file)	YES
84602	9	B02	139	4554467	-	0.9881	748	NA	NA	203437	1126	-	gene	pRL27	TagModule_0074	SO4359		NA	outer membrane protein, putative (NCBI ptt file)
84603	9	B03	140	116712	+	1	559	NA	NA	203939	261	-	gene	pRL27	TagModule_0075	SOA0132		3710	conserved hypothetical protein (NCBI ptt file)
84604	9	B04	139	4554099	+	0.9437	551	NA	NA	203437	1494	-	gene	pRL27	TagModule_0076	SO4359		NA	outer membrane protein, putative (NCBI ptt file)
84605	9	B06	140	110016	-	0.9815	755	NA	NA	NA	NA		between	pRL27	TagModule_0078			NA
84606	9	B07	139	147928	-	0.9838	491	NA	NA	199338	1911	-	gene	pRL27	TagModule_0079	SO0141		5001	sensory box protein (NCBI ptt file)
84607	9	B08	139	1499845	+	1	279	0.9833	60	NA	NA		between	pRL27	TagModule_0080			NA
84608	9	B09	139	4019133	-	0.9712	413	NA	NA	202958	1077	+	gene	pRL27	TagModule_0081	SO3872		NA	arylsulfate sulfotransferase (NCBI ptt file)
84609	9	B10	139	66311	+	0.9059	196	NA	NA	199255	49	-	gene	pRL27	TagModule_0082	SO0058		569	potassium uptake protein, putative (NCBI ptt file)	YES
84610	9	B11	140	132393	-	0.9876	403	0.9901	403	NA	NA		between	pRL27	TagModule_0083			NA
84611	9	B12	139	3993132	+	0.9844	705	NA	NA	202930	32	+	gene	pRL27	TagModule_0084	SO3844		3590	peptidase, M13 family (NCBI ptt file)	YES	YES
84612	9	C01	139	2245559	+	0.9762	872	NA	NA	201294	416	+	gene	pRL27	TagModule_0073	SO2137		2095	conserved hypothetical protein TIGR00427 (NCBI ptt file)
84613	9	C02	139	4272107	+	0.9628	589	NA	NA	203196	389	-	gene	pRL27	TagModule_0074	SO4112	mshL	1450	MSHA biogenesis protein MshL (NCBI ptt file)
84614	9	C03	139	1597547	+	0.9735	677	NA	NA	200693	1186	-	gene	pRL27	TagModule_0075	SO1522		1620	L-lactate permease, putative (NCBI ptt file)		YES
84615	9	C04	139	4349536	+	0.9964	547	NA	NA	203260	270	-	gene	pRL27	TagModule_0076	SO4177		NA	hypothetical protein (NCBI ptt file)
84616	9	C06	140	37494	+	1	687	NA	NA	203872	350	-	gene	pRL27	TagModule_0078	SOA0048		1506	prolyl oligopeptidase family protein (NCBI ptt file)
84617	9	C07	139	4881402	+	0.9982	549	NA	NA	203751	993	-	gene	pRL27	TagModule_0079	SO4682		438	glycosyl transferase, group 1 family protein (NCBI ptt file)
84618	9	C08	139	4460970	+	0.9962	519	NA	NA	203360	389	+	gene	pRL27	TagModule_0080	SO4281		569	potassium uptake protein KtrA, putative (NCBI ptt file)
84619	9	C09	139	801697	-	0.9976	414	NA	NA	199973	374	-	gene	pRL27	TagModule_0081	SO0787		NA	hypothetical protein (NCBI ptt file)
84620	9	C10	139	4553807	-	0.9776	968	NA	NA	203437	1786	-	gene	pRL27	TagModule_0082	SO4359		NA	outer membrane protein, putative (NCBI ptt file)
84621	9	C11	139	4665037	-	0.9795	771	NA	NA	NA	NA		between	pRL27	TagModule_0083			NA
84622	9	C12	140	21310	-	0.9934	756	0.9934	756	NA	NA		between	pRL27	TagModule_0084			NA
84623	9	D01	140	31644	+	0.9976	414	NA	NA	203866	105	+	gene	pRL27	TagModule_0073	SOA0042		NA	hypothetical protein (NCBI ptt file)		YES
84624	9	D02	139	565271	+	1	532	NA	NA	199735	807	+	gene	pRL27	TagModule_0074	SO0544		NA	sensory box histidine kinase (NCBI ptt file)
84625	9	D03	139	3202252	-	0.9632	570	NA	NA	202200	291	+	gene	pRL27	TagModule_0075	SO3083		1025	peptidase, M16 family (NCBI ptt file)
84626	9	D04	139	365870	+	0.9739	646	NA	NA	199552	76	+	gene	pRL27	TagModule_0076	SO0357		2015	metallo-beta-lactamase superfamily protein (NCBI ptt file)
84627	9	D05	139	1585385	-	0.9931	581	NA	NA	200681	695	+	gene	pRL27	TagModule_0077	SO1510		NA	hypothetical protein (NCBI ptt file)		YES
84628	9	D06	139	322185	+	0.9675	673	NA	NA	199509	203	-	gene	pRL27	TagModule_0078	SO0314	speF	1982	ornithine decarboxylase, inducible (NCBI ptt file)
84629	9	D07	139	3637239	+	0.9974	780	NA	NA	202592	494	-	gene	pRL27	TagModule_0079	SO3489		NA	GGDEF domain protein (NCBI ptt file)		YES
84630	9	D08	140	30654	+	0.9975	814	NA	NA	203863	1080	+	gene	pRL27	TagModule_0080	SO_A0039		NA	hypothetical protein (NCBI)
84631	9	D09	139	3394232	-	0.9555	942	NA	NA	202366	320	+	gene	pRL27	TagModule_0081	SO3258		NA	conserved hypothetical protein (NCBI ptt file)
84632	9	D10	139	4463149	+	0.9976	412	NA	NA	203362	550	+	gene	pRL27	TagModule_0082	SO4283		1477	apbE family protein (NCBI ptt file)
84633	9	D11	139	845270	+	0.9974	775	NA	NA	200013	536	-	gene	pRL27	TagModule_0083	SO0827	lldP	1620	L-lactate permease (NCBI ptt file)
84634	9	E01	139	99369	-	0.986	141	NA	NA	NA	NA		between	pRL27	TagModule_0073			NA
84635	9	E02	140	82438	-	0.9889	268	0.9852	268	NA	NA		between	pRL27	TagModule_0074			NA
84636	9	E03	140	124840	+	0.9922	637	NA	NA	NA	NA		between	pRL27	TagModule_0075			NA
84637	9	E04	139	3515282	-	0.9839	308	NA	NA	202482	285	+	gene	pRL27	TagModule_0076	SO3374		NA	conserved hypothetical protein (NCBI ptt file)	YES	YES
84638	9	E05	139	1174616	+	0.9774	570	NA	NA	200312	391	+	gene	pRL27	TagModule_0077	SO1132		NA	hypothetical protein (NCBI ptt file)
84639	9	E07	139	1353884	-	0.9362	233	NA	NA	200476	456	-	gene	pRL27	TagModule_0079	SO1301	pyrB	540	aspartate carbamoyltransferase (NCBI ptt file)
84640	9	E08	140	76802	+	0.9911	444	NA	NA	NA	NA		between	pRL27	TagModule_0080			NA
84641	9	E09	139	1595298	-	0.9846	643	NA	NA	200692	1665	-	gene	pRL27	TagModule_0081	SO1521		277	iron-sulfur cluster-binding protein (NCBI ptt file)
84642	9	E10	139	734969	+	0.9623	713	NA	NA	199907	1676	-	gene	pRL27	TagModule_0082	SO0719		4771	TonB-dependent receptor, putative (NCBI ptt file)
84643	9	E11	139	1796294	+	0.9731	810	NA	NA	200871	529	+	gene	pRL27	TagModule_0083	SO1707		842	ABC transporter, permease protein, putative (NCBI ptt file)
84644	9	E12	139	3082137	+	0.9882	255	NA	NA	NA	NA		between	pRL27	TagModule_0084			NA
84645	9	F01	139	2087557	+	0.9902	708	NA	NA	NA	NA		between	pRL27	TagModule_0073			NA
84646	9	F02	139	2055045	-	0.9642	611	NA	NA	201110	3029	+	gene	pRL27	TagModule_0074	SO1949		NA	invasin domain protein (NCBI ptt file)
84647	9	F03	140	15409	+	0.9432	645	0.943	643	NA	NA		between	pRL27	TagModule_0075			NA
84648	9	F04	139	3667106	-	0.9886	436	NA	NA	202615	2613	-	gene	pRL27	TagModule_0076	SO3514		1629	hypothetical TonB-dependent receptor (NCBI ptt file)
84649	9	F05	140	19310	-	0.9804	611	NA	NA	203848	156	+	gene	pRL27	TagModule_0077	SOA0023	higA	3093	proteic killer suppressor protein (NCBI ptt file)	YES
84650	9	F06	139	743827	-	0.9885	87	NA	NA	NA	NA		between	pRL27	TagModule_0078			NA
84651	9	F07	140	88827	+	0.9928	276	NA	NA	203922	65	+	gene	pRL27	TagModule_0079	SOA0108		NA	hypothetical protein (NCBI ptt file)
84652	9	F08	139	4073912	-	0.9829	232	NA	NA	203011	576	+	gene	pRL27	TagModule_0080	SO3926		1160	GTP-binding protein (NCBI ptt file)	YES
84653	9	F10	140	42396	+	0.9839	122	NA	NA	NA	NA		between	pRL27	TagModule_0082			NA
84654	9	F11	140	69262	+	0.9597	418	NA	NA	NA	NA		between	pRL27	TagModule_0083			NA
84655	9	F12	139	3205439	+	0.983	410	NA	NA	202201	404	+	gene	pRL27	TagModule_0084	SO3084		5001	sensory box protein (NCBI ptt file)
84656	9	G01	140	87485	+	0.9938	485	NA	NA	NA	NA		between	pRL27	TagModule_0073			NA
84657	9	G02	139	2210504	+	0.9727	722	NA	NA	201268	202	-	gene	pRL27	TagModule_0074	SO2111		NA	hypothetical protein (NCBI ptt file)	YES	YES
84658	9	G03	139	4466089	-	0.972	873	NA	NA	203365	554	-	gene	pRL27	TagModule_0075	SO4286	motB	1360	chemotaxis motB protein (NCBI ptt file)
84659	9	G04	139	4022963	+	0.9621	264	NA	NA	NA	NA		between	pRL27	TagModule_0076			NA
84660	9	G05	139	545094	-	0.9951	807	NA	NA	NA	NA		between	pRL27	TagModule_0077			NA
84661	9	G06	139	4554590	-	0.9953	638	NA	NA	203437	1003	-	gene	pRL27	TagModule_0078	SO4359		NA	outer membrane protein, putative (NCBI ptt file)
84662	9	G07	140	26943	-	0.9846	192	0.9846	192	NA	NA		between	pRL27	TagModule_0079			NA
84663	9	G08	139	1505062	+	0.9903	722	NA	NA	200614	125	+	gene	pRL27	TagModule_0080	SO1442		NA	conserved hypothetical protein (NCBI ptt file)
84664	9	G09	140	2189	+	0.9565	368	NA	NA	NA	NA		between	pRL27	TagModule_0081			NA
84665	9	G10	139	3264835	+	0.9842	314	NA	NA	202250	74	+	gene	pRL27	TagModule_0082	SO3136	dctM	1593	C4-dicarboxylate transport protein (NCBI ptt file)		YES
84666	9	G11	140	120098	-	0.9682	752	NA	NA	NA	NA		between	pRL27	TagModule_0083			NA
84667	9	G12	139	4616902	+	1	145	NA	NA	203501	1102	+	gene	pRL27	TagModule_0084	SO4425		2199	GGDEF family protein (NCBI ptt file)
84668	9	H01	139	3868354	-	0.9225	142	NA	NA	202817	311	-	gene	pRL27	TagModule_0073	SO3723	cysC	529	adenylylsulfate kinase (NCBI ptt file)
84669	9	H02	139	4662279	+	1	416	NA	NA	203548	448	-	gene	pRL27	TagModule_0074	SO4473		3637	outer membrane protein, putative (NCBI ptt file)
84670	9	H03	140	101265	+	0.9563	183	0.9563	183	NA	NA		between	pRL27	TagModule_0075			NA
84671	9	H04	139	3319029	+	0.9674	366	NA	NA	202290	840	-	gene	pRL27	TagModule_0076	SO3180		463	glycosyl transferase, group 2 family protein (NCBI ptt file)
84672	9	H05	140	86208	-	1	313	NA	NA	203920	884	+	gene	pRL27	TagModule_0077	SOA0106		840	methyl-accepting chemotaxis protein (NCBI ptt file)
84673	9	H06	139	1087102	+	0.981	368	NA	NA	200232	357	+	gene	pRL27	TagModule_0078	SO1049		1670	acetyltransferase, GNAT family (NCBI ptt file)	YES	YES
84674	9	H07	139	2848937	-	0.9834	359	0.9778	359	NA	NA		between	pRL27	TagModule_0079			NA
84675	9	H08	139	654819	-	0.9868	525	NA	NA	199816	1351	+	gene	pRL27	TagModule_0080	SO0628		2200	GGDEF domain protein (NCBI ptt file)		YES
84676	9	H09	139	845144	+	0.9908	652	NA	NA	200013	662	-	gene	pRL27	TagModule_0081	SO0827	lldP	1620	L-lactate permease (NCBI ptt file)
84677	9	H10	139	1513693	+	0.9847	590	NA	NA	NA	NA		between	pRL27	TagModule_0082			NA
84678	9	H11	140	100818	-	0.974	462	0.974	462	NA	NA		between	pRL27	TagModule_0083			NA
84679	9	H12	139	3082137	+	0.9216	255	NA	NA	NA	NA		between	pRL27	TagModule_0084			NA
71658	10	A01	139	3877583	-	0.9973	368	NA	NA	202826	68	-	gene	pRL27	TagModule_0085	SO3733		NA	hypothetical protein (NCBI ptt file)		YES
71659	10	A02	139	3753408	+	0.9815	594	NA	NA	202684	424	+	gene	pRL27	TagModule_0086	SO3587		NA	hypothetical protein (NCBI ptt file)	YES	YES
71660	10	A03	140	64337	-	0.988	167	0.9759	166	NA	NA		between	pRL27	TagModule_0087			NA
71661	10	A04	139	1505440	-	0.9969	646	NA	NA	200614	503	+	gene	pRL27	TagModule_0088	SO1442		NA	conserved hypothetical protein (NCBI ptt file)
71662	10	A05	139	494640	+	1	282	NA	NA	NA	NA		between	pRL27	TagModule_0089			NA
71663	10	A06	139	4627211	+	0.9688	731	NA	NA	203514	90	+	gene	pRL27	TagModule_0090	SO4439		3188	conserved hypothetical protein (NCBI ptt file)
71664	10	A07	139	1506847	+	1	163	NA	NA	200615	95	+	gene	pRL27	TagModule_2564	SO1443		NA	conserved hypothetical protein (NCBI ptt file)
71665	10	A08	139	4509836	-	1	554	NA	NA	203401	654	+	gene	pRL27	TagModule_0092	SO4322		3672	conserved hypothetical protein (NCBI ptt file)
71666	10	A09	139	4571674	-	0.9906	635	NA	NA	203455	921	+	gene	pRL27	TagModule_0093	SO4377		4258	membrane protein, putative (NCBI ptt file)
71667	10	A10	140	38308	-	0.9907	637	NA	NA	NA	NA		between	pRL27	TagModule_0094			NA
71668	10	A11	139	2133061	+	0.9715	559	0.9715	558	NA	NA		between	pRL27	TagModule_0095			NA
71669	10	B01	139	3514938	-	0.9832	705	NA	NA	NA	NA		between	pRL27	TagModule_0085			NA
71670	10	B02	139	3769278	+	0.9379	318	NA	NA	202705	811	-	gene	pRL27	TagModule_0086	SO3608		NA	serine/threonine protein kinase (NCBI ptt file)
71671	10	B03	139	494327	+	0.9921	760	NA	NA	370299	86	-	gene	pRL27	TagModule_0087	SO0468.1		NA	hypothetical protein (NCBI ptt file)
71672	10	B04	139	3894496	+	0.9779	588	NA	NA	NA	NA		between	pRL27	TagModule_0088			NA
71673	10	B05	139	1570410	+	1	287	NA	NA	NA	NA		between	pRL27	TagModule_0089			NA
71674	10	B06	139	95517	-	0.9805	911	NA	NA	199281	311	-	gene	pRL27	TagModule_0090	SO0084		4229	HAD-superfamily hydrolase, subfamily IA, variant 1 family protein (NCBI ptt file)
71675	10	B07	139	4558544	-	0.9988	833	NA	NA	203442	293	+	gene	pRL27	TagModule_0091	SO4364	recG	1200	ATP-dependent DNA helicase RecG (NCBI ptt file)
71676	10	B08	139	4829131	-	0.9964	558	NA	NA	203703	372	+	gene	pRL27	TagModule_0092	SO4633	ompR	745	transcriptional regulatory protein OmpR (NCBI ptt file)
71677	10	B09	139	4463149	+	1	420	NA	NA	203362	550	+	gene	pRL27	TagModule_0093	SO4283		1477	apbE family protein (NCBI ptt file)
71678	10	B10	139	2797699	+	1	569	NA	NA	NA	NA		between	pRL27	TagModule_0094			NA
71679	10	B11	139	213357	+	0.9917	358	NA	NA	199401	189	+	gene	pRL27	TagModule_0095	SO0205		NA	hypothetical protein (NCBI ptt file)		YES
71680	10	C01	139	102023	+	0.9911	336	NA	NA	199290	171	-	gene	pRL27	TagModule_0085	SO0093		1972	NupC family protein (NCBI ptt file)
71681	10	C02	139	3771934	+	0.9812	897	NA	NA	NA	NA		between	pRL27	TagModule_0086			NA
71682	10	C03	139	120140	-	0.9757	740	NA	NA	199306	179	+	gene	pRL27	TagModule_0087	SO0109		425	conserved hypothetical protein (NCBI ptt file)	YES
71683	10	C04	139	1172078	-	0.9375	64	NA	NA	200308	50	-	gene	pRL27	TagModule_0088	SO1128		NA	hypothetical protein (NCBI ptt file)	YES
71684	10	C05	139	699389	-	0.9954	649	NA	NA	199868	2768	+	gene	pRL27	TagModule_1199	SO0680		NA	hypothetical protein (NCBI ptt file)
71685	10	C06	140	34116	+	0.961	614	NA	NA	203869	493	+	gene	pRL27	TagModule_0090	SO_A0045		4974	site-specific recombinase, phage integrase family (NCBI)
71686	10	C07	139	2700419	-	0.973	776	NA	NA	201710	558	-	gene	pRL27	TagModule_0091	SO2570		4805	lipoprotein, putative (NCBI ptt file)
71687	10	C08	139	2499909	-	0.9782	588	NA	NA	201539	820	-	gene	pRL27	TagModule_0092	SO2395		1960	acyl-CoA dehydrogenase family protein (NCBI ptt file)
71688	10	C09	139	4709022	+	0.9898	294	NA	NA	203588	515	+	gene	pRL27	TagModule_0093	SO4514	fdhB-2	437	formate dehydrogenase, iron-sulfur subunit (NCBI ptt file)	YES	YES
71689	10	C10	140	150628	-	0.9654	492	0.9654	492	NA	NA		between	pRL27	TagModule_0094			NA
71690	10	C11	140	151416	+	0.945	290	NA	NA	NA	NA		between	pRL27	TagModule_0095			NA
71691	10	C12	139	405563	+	0.9789	744	NA	NA	199584	235	+	gene	pRL27	TagModule_0096	SO0391		NA	hypothetical protein (NCBI ptt file)	YES
71692	10	D01	139	2851366	-	0.9862	433	NA	NA	201873	180	+	gene	pRL27	TagModule_0085	SO2735		NA	hypothetical protein (NCBI ptt file)
71693	10	D02	140	125310	+	0.9798	731	NA	NA	203944	92	+	gene	pRL27	TagModule_0086	SO_A0139		NA	hypothetical protein (NCBI)
71694	10	D03	139	658325	+	0.975	756	NA	NA	199820	249	+	gene	pRL27	TagModule_0087	SO0632	hrpB	1643	ATP-dependent helicase HrpB (NCBI ptt file)		YES
71695	10	D04	139	4199080	-	0.9856	344	NA	NA	203129	60	+	gene	pRL27	TagModule_0088	SO4045		NA	hypothetical protein (NCBI ptt file)
71696	10	D05	139	2103312	-	0.9824	509	NA	NA	NA	NA		between	pRL27	TagModule_0089			NA
71697	10	D06	139	832269	+	0.9885	862	NA	NA	200004	1002	+	gene	pRL27	TagModule_0090	SO0818	metE	620	5-methyltetrahydropteroyltriglutamate--homocysteine methyltransferase (NCBI ptt file)	YES
71698	10	D07	139	4464970	+	0.9753	844	NA	NA	203363	1106	+	gene	pRL27	TagModule_0091	SO4284		3328	ISSod5, transposase (NCBI ptt file)
71699	10	D08	139	692958	+	0.9984	626	NA	NA	199862	724	+	gene	pRL27	TagModule_0092	SO0674		4388	prophage MuSo1, protein Gp32, putative (NCBI ptt file)
71700	10	D09	139	3400472	-	1	158	NA	NA	202372	180	+	gene	pRL27	TagModule_0093	SO3264		NA	hypothetical protein (NCBI ptt file)
71701	10	D10	139	767857	+	0.9566	369	NA	NA	199936	998	+	gene	pRL27	TagModule_0094	SO0750		69	glutamate synthase, putative (NCBI ptt file)	YES
71702	10	D11	139	2675850	-	1	266	NA	NA	201683	1251	+	gene	pRL27	TagModule_0095	SO2543		NA	sensor histidine kinase (NCBI ptt file)
71703	10	D12	139	1928472	-	0.9751	318	NA	NA	NA	NA		between	pRL27	TagModule_0096			NA
71704	10	E01	139	4447710	-	1	132	NA	NA	203348	130	-	gene	pRL27	TagModule_0085	SO4267	hsdR-2	4096	type I restriction-modification system, R subunit (NCBI ptt file)
71705	10	E02	139	1482136	+	1	798	NA	NA	200597	647	+	gene	pRL27	TagModule_0086	SO1422		583	transcriptional regulator, LysR family (NCBI ptt file)
71706	10	E03	139	2398574	-	1	250	1	250	NA	NA		between	pRL27	TagModule_0087			NA
71707	10	E04	139	2782853	-	0.9867	674	NA	NA	201783	494	+	gene	pRL27	TagModule_0088	SO2645		1806	conserved hypothetical protein (NCBI ptt file)
71708	10	E05	139	472973	+	1	329	NA	NA	199636	724	+	gene	pRL27	TagModule_0089	SO0444		NA	hypothetical protein (NCBI ptt file)
71709	10	E06	139	3599063	-	0.9709	309	NA	NA	202558	1236	-	gene	pRL27	TagModule_0090	SO3455	relA	317	GTP pyrophosphokinase (NCBI ptt file)
71710	10	E07	140	135019	-	0.9941	506	NA	NA	2200910	208	+	gene	pRL27	TagModule_0091	SO_A0182		NA	hypothetical protein (NCBI)
71711	10	E08	139	405498	+	0.9913	687	NA	NA	199584	170	+	gene	pRL27	TagModule_0092	SO0391		NA	hypothetical protein (NCBI ptt file)
71712	10	E09	139	4580764	-	0.9952	628	NA	NA	203463	443	+	gene	pRL27	TagModule_0093	SO4385		2304	von Willebrand factor type A domain protein (NCBI ptt file)
71713	10	E10	140	108596	+	0.9896	479	0.9813	479	NA	NA		between	pRL27	TagModule_0094			NA
71714	10	E11	139	986341	+	0.9924	261	NA	NA	200133	1329	+	gene	pRL27	TagModule_0095	SO0949	brnQ	1114	branched-chain amino acid transport system II carrier protein BrnQ (NCBI ptt file)
71715	10	E12	139	4463141	-	0.9683	313	NA	NA	203362	542	+	gene	pRL27	TagModule_0096	SO4283		1477	apbE family protein (NCBI ptt file)
71716	10	F01	139	4687795	+	0.9742	542	NA	NA	NA	NA		between	pRL27	TagModule_0085			NA
71717	10	F02	139	1004245	-	0.9586	623	NA	NA	200156	13	+	gene	pRL27	TagModule_0086	SO0972		NA	conserved hypothetical protein (NCBI ptt file)
71718	10	F03	140	19562	-	0.9698	491	0.9698	491	NA	NA		between	pRL27	TagModule_0087			NA
71719	10	F04	139	145062	+	0.9849	589	NA	NA	199335	345	-	gene	pRL27	TagModule_0088	SO0138	moeA	303	molybdopterin biosynthesis MoeA protein (NCBI ptt file)
71720	10	F05	139	1185033	-	0.9979	467	NA	NA	200322	2087	+	gene	pRL27	TagModule_0089	SO1142	carB	458	carbamoyl-phosphate synthase, large subunit (NCBI ptt file)		YES
71721	10	F06	139	846910	+	0.9857	558	NA	NA	200014	974	-	gene	pRL27	TagModule_0090	SO0828		2813	conserved hypothetical protein (NCBI ptt file)		YES
71722	10	F07	139	4788267	-	0.9969	646	NA	NA	203666	254	+	gene	pRL27	TagModule_0091	SO4596		NA	copper-transporting ATPase domain protein (NCBI ptt file)	YES	YES
71723	10	F08	139	1021886	-	0.9923	388	NA	NA	200173	494	+	gene	pRL27	TagModule_0092	SO0989		583	transcriptional regulator, LysR family (NCBI ptt file)
71724	10	F09	139	4823508	+	0.9481	405	NA	NA	203698	1393	-	gene	pRL27	TagModule_0093	SO4628		1368	sulfatase (NCBI ptt file)
71725	10	F10	139	984179	-	0.9964	273	NA	NA	200132	221	-	gene	pRL27	TagModule_0094	SO0948		4123	conserved hypothetical protein (NCBI ptt file)
71726	10	F12	140	89029	+	0.9915	471	NA	NA	203922	267	+	gene	pRL27	TagModule_0096	SOA0108		NA	hypothetical protein (NCBI ptt file)		YES
71727	10	G01	140	41807	-	0.9878	487	NA	NA	203874	553	-	gene	pRL27	TagModule_0085	SOA0050		1566	toxin secretion, membrane fusion protein (NCBI ptt file)
71728	10	G02	140	51361	+	0.9888	531	NA	NA	203887	433	+	gene	pRL27	TagModule_0086	SOA0063		3316	ISSod8, transposase (NCBI ptt file)
71729	10	G03	139	2223946	-	0.9583	264	NA	NA	201276	615	+	gene	pRL27	TagModule_0087	SO2119		2208	response regulator (NCBI ptt file)
71730	10	G06	140	102669	-	1	381	1	381	NA	NA		between	pRL27	TagModule_0090			NA
71731	10	G07	139	2222904	-	1	487	NA	NA	201274	1014	+	gene	pRL27	TagModule_0091	SO2117		840	methyl-accepting chemotaxis protein (NCBI ptt file)
71732	10	G08	139	102030	+	0.9807	362	NA	NA	199290	164	-	gene	pRL27	TagModule_0092	SO0093		1972	NupC family protein (NCBI ptt file)
71733	10	G10	139	2692701	-	0.9848	130	NA	NA	201703	203	+	gene	pRL27	TagModule_0094	SO2563		491	metallo-beta-lactamase family protein (NCBI ptt file)		YES
71734	10	G11	139	209007	+	0.989	729	NA	NA	199395	516	+	gene	pRL27	TagModule_0095	SO0198		NA	transcriptional regulator, TetR family (NCBI ptt file)	YES
71735	10	G12	139	1583842	+	0.9504	462	NA	NA	NA	NA		between	pRL27	TagModule_0096			NA
71736	10	H01	140	137230	-	1	329	NA	NA	203953	666	+	gene	pRL27	TagModule_0085	SOA0149		1237	conserved hypothetical protein (NCBI ptt file)
71737	10	H02	139	399461	+	0.9375	448	NA	NA	NA	NA		between	pRL27	TagModule_0086			NA
71738	10	H03	140	45935	-	1	56	0.9714	68	NA	NA		between	pRL27	TagModule_0087			NA
71739	10	H04	139	1122314	-	0.9941	503	NA	NA	200263	615	-	gene	pRL27	TagModule_0088	SO1081		NA	hypothetical protein (NCBI ptt file)
71740	10	H05	139	2107428	-	0.9979	480	NA	NA	201169	92	+	gene	pRL27	TagModule_0089	SO2009		3219	conserved hypothetical protein (NCBI ptt file)	YES
71741	10	H06	139	2224792	+	1	279	NA	NA	201276	1461	+	gene	pRL27	TagModule_0090	SO2119		2208	response regulator (NCBI ptt file)
71742	10	H07	139	4459851	+	0.9409	507	NA	NA	NA	NA		between	pRL27	TagModule_0091			NA
71743	10	H08	139	4557704	-	0.9804	100	NA	NA	NA	NA		between	pRL27	TagModule_0092			NA
71744	10	H09	139	844568	+	1	76	NA	NA	200013	1238	-	gene	pRL27	TagModule_0093	SO0827	lldP	1620	L-lactate permease (NCBI ptt file)
71745	10	H10	139	708646	+	0.9572	183	NA	NA	199878	571	+	gene	pRL27	TagModule_0094	SO0690		338	type II DNA modification methyltransferase, putative (NCBI ptt file)
71746	10	H11	139	1294170	+	0.97	532	NA	NA	NA	NA		between	pRL27	TagModule_0095			NA
73240	11	A01	139	990415	+	0.9791	900	NA	NA	200137	295	+	gene	pRL27	TagModule_0098	SO0953		NA	hypothetical protein (NCBI ptt file)	YES	YES
73241	11	A02	139	1833304	+	0.9942	517	NA	NA	200915	1595	+	gene	pRL27	TagModule_0098	SO1751		NA	membrane protein, putative (NCBI ptt file)
73242	11	A03	139	4897539	-	0.9811	369	NA	NA	NA	NA		between	pRL27	TagModule_0099			NA
73243	11	A04	139	1506017	-	1	70	NA	NA	200614	1080	+	gene	pRL27	TagModule_0100	SO1442		NA	conserved hypothetical protein (NCBI ptt file)
73244	11	A05	139	4783979	-	0.9896	573	NA	NA	203659	687	-	gene	pRL27	TagModule_0101	SO4589		4977	transcriptional regulator, AraC family (NCBI ptt file)
73245	11	A06	139	1448664	+	0.9981	536	NA	NA	200566	384	+	gene	pRL27	TagModule_0102	SO1391		2031	hypothetical Short chain fatty acid transporter (NCBI ptt file)	YES
73246	11	A07	139	4614009	-	0.9492	196	NA	NA	370287	968	+	gene	pRL27	TagModule_0103	SO4423.1		NA	hypothetical ferric aerobactin receptor (NCBI ptt file)
73247	11	A08	139	292997	+	0.9764	799	NA	NA	199480	1430	+	gene	pRL27	TagModule_0104	SO0285		4796	type IV pilus biogenesis protein PilQ (NCBI ptt file)
73248	11	A09	139	2223946	-	0.9914	580	NA	NA	201276	615	+	gene	pRL27	TagModule_0105	SO2119		2208	response regulator (NCBI ptt file)
73249	11	A10	139	4662801	+	0.9844	830	NA	NA	NA	NA		between	pRL27	TagModule_0106			NA
73250	11	A11	139	3709588	-	0.9669	894	NA	NA	202653	622	-	gene	pRL27	TagModule_0107	SO3552		2304	von Willebrand factor type A domain protein (NCBI ptt file)	YES	YES
73251	11	A12	139	3316740	-	0.9882	424	NA	NA	202288	421	-	gene	pRL27	TagModule_0108	SO3178		NA	hypothetical protein (NCBI ptt file)
73252	11	B01	140	32016	-	0.9843	823	NA	NA	203866	477	+	gene	pRL27	TagModule_0098	SOA0042		NA	hypothetical protein (NCBI ptt file)
73253	11	B02	139	3494799	-	0.9829	348	NA	NA	NA	NA		between	pRL27	TagModule_0098			NA
73254	11	B03	140	117257	-	1	337	NA	NA	NA	NA		between	pRL27	TagModule_0099			NA
73255	11	B04	140	87492	+	0.9915	589	NA	NA	NA	NA		between	pRL27	TagModule_0100			NA
73256	11	B05	139	1094498	-	0.9782	898	NA	NA	200237	1008	+	gene	pRL27	TagModule_0101	SO1055		2199	sensory box protein (NCBI ptt file)
73257	11	B06	139	3789258	-	0.9622	578	NA	NA	202726	62	-	gene	pRL27	TagModule_0102	SO3630		NA	hypothetical protein (NCBI ptt file)		YES
73258	11	B07	139	4242631	+	0.947	490	NA	NA	203172	611	-	gene	pRL27	TagModule_0103	SO4088		842	conserved hypothetical protein (NCBI ptt file)	YES	YES
73259	11	B08	139	1782647	+	0.9958	712	NA	NA	200859	532	-	gene	pRL27	TagModule_0104	SO1694		NA	FAD-binding protein (NCBI ptt file)
73260	11	B09	139	4728404	-	0.9927	820	NA	NA	NA	NA		between	pRL27	TagModule_0105			NA
73261	11	B10	139	750413	-	1	216	NA	NA	199923	901	+	gene	pRL27	TagModule_0106	SO0735		NA	hypothetical protein (NCBI ptt file)
73262	11	B11	140	87944	-	0.9903	617	NA	NA	NA	NA		between	pRL27	TagModule_0107			NA
73263	11	C01	139	4320609	-	0.9761	828	NA	NA	203232	11008	+	gene	pRL27	TagModule_0098	SO4149		NA	RTX toxin, putative (NCBI ptt file)
73264	11	C02	139	417246	-	0.9804	658	NA	NA	NA	NA		between	pRL27	TagModule_0098			NA
73265	11	C03	139	3918623	-	0.9308	347	NA	NA	202860	431	-	gene	pRL27	TagModule_0099	SO3769		3025	conserved hypothetical protein (NCBI ptt file)
73266	11	C04	140	127746	-	0.9885	518	NA	NA	203945	1330	+	gene	pRL27	TagModule_0100	SOA0140		NA	hypothetical protein (NCBI ptt file)
73267	11	C05	139	3206447	-	0.9701	534	NA	NA	202201	1412	+	gene	pRL27	TagModule_0101	SO3084		5001	sensory box protein (NCBI ptt file)
73268	11	C06	139	3447702	-	0.9651	819	NA	NA	NA	NA		between	pRL27	TagModule_0102			NA
73269	11	C07	139	1130490	+	0.9846	517	NA	NA	NA	NA		between	pRL27	TagModule_0103			NA
73270	11	C08	139	4465473	-	0.9801	199	NA	NA	NA	NA		between	pRL27	TagModule_0104			NA
73271	11	C09	140	80078	+	0.9916	827	NA	NA	203916	1392	-	gene	pRL27	TagModule_0105	SOA0100		1574	conserved hypothetical protein (NCBI ptt file)
73272	11	C10	140	36326	+	0.9902	709	NA	NA	203872	1518	-	gene	pRL27	TagModule_0106	SOA0048		1506	prolyl oligopeptidase family protein (NCBI ptt file)
73273	11	C11	139	2916627	+	0.9589	144	NA	NA	201927	98	+	gene	pRL27		SO2795		3324	glyoxalase family protein (NCBI ptt file)
73274	11	C12	139	1579845	+	0.9606	506	NA	NA	NA	NA		between	pRL27	TagModule_0108			NA
73275	11	D01	139	4553310	-	0.9911	557	NA	NA	203436	294	-	gene	pRL27	TagModule_0098	SO4358	dmaA-2	243	anaerobic dimethyl sulfoxide reductase, A subunit (NCBI ptt file)
73276	11	D02	139	2222209	-	0.9692	859	NA	NA	201274	319	+	gene	pRL27	TagModule_0098	SO2117		840	methyl-accepting chemotaxis protein (NCBI ptt file)
73277	11	D03	139	913050	-	0.9563	435	NA	NA	200070	290	-	gene	pRL27	TagModule_0099	SO0884		NA	conserved hypothetical protein (NCBI ptt file)	YES	YES
73278	11	D04	139	4618866	-	0.982	551	NA	NA	203502	221	-	gene	pRL27	TagModule_0100	SO4427		642	sensor histidine kinase (NCBI ptt file)		YES
73279	11	D05	139	367444	+	0.9719	674	NA	NA	199552	1650	+	gene	pRL27	TagModule_0101	SO0357		2015	metallo-beta-lactamase superfamily protein (NCBI ptt file)
73280	11	D06	139	861487	-	0.9596	755	NA	NA	200027	192	+	gene	pRL27	TagModule_0102	SO0841		2199	GGDEF domain protein (NCBI ptt file)
73281	11	D07	139	1666240	-	0.9922	385	NA	NA	200759	338	+	gene	pRL27	TagModule_0103	SO1592		NA	hypothetical protein (NCBI ptt file)
73282	11	D08	139	2881009	+	0.9885	782	NA	NA	201894	627	-	gene	pRL27	TagModule_0104	SO2758		2199	GGDEF family protein (NCBI ptt file)	YES	YES
73283	11	D09	139	2250822	-	0.9911	564	NA	NA	201298	1379	+	gene	pRL27	TagModule_0105	SO2143		2985	conserved hypothetical protein (NCBI ptt file)
73284	11	D10	139	938049	-	0.9667	507	NA	NA	NA	NA		between	pRL27	TagModule_0106			NA
73285	11	D11	139	4765659	-	0.9364	393	NA	NA	203641	660	-	gene	pRL27	TagModule_0107	SO4571		583	transcriptional regulator, LysR family (NCBI ptt file)
73286	11	D12	139	3988576	-	0.9786	234	NA	NA	202925	931	-	gene	pRL27	TagModule_0108	SO3838		840	methyl-accepting chemotaxis protein (NCBI ptt file)
73287	11	E01	139	4544687	-	0.9503	578	NA	NA	203429	976	-	gene	pRL27	TagModule_0099	SO4351		1253	CBS domain protein (NCBI ptt file)
73288	11	E03	139	548309	-	0.993	709	NA	NA	199716	64	+	gene	pRL27	TagModule_0099	SO0525		NA	drug resistance transporter, EmrB/QacA family protein (NCBI ptt file)
73289	11	E04	140	133693	-	0.9837	242	0.9837	242	NA	NA		between	pRL27	TagModule_0100			NA
73290	11	E05	139	4288065	+	0.9936	779	NA	NA	203213	390	-	gene	pRL27	TagModule_0101	SO4130		1585	conserved hypothetical protein (NCBI ptt file)
73291	11	E06	139	4588476	+	0.9899	785	NA	NA	NA	NA		between	pRL27	TagModule_0102			NA
73292	11	E07	140	13349	-	0.971	755	0.971	755	NA	NA		between	pRL27	TagModule_0103			NA
73293	11	E08	139	1416511	+	0.9877	489	NA	NA	200536	829	+	gene	pRL27	TagModule_0104	SO1361	aroF	722	phospho-2-dehydro-3-deoxyheptonate aldolase, tyr-sensitive (NCBI ptt file)
73294	11	E09	139	4883617	-	0.9939	660	NA	NA	203754	389	+	gene	pRL27	TagModule_0105	SO4685		NA	conserved hypothetical protein (NCBI ptt file)
73295	11	E10	140	3713	+	0.979	664	NA	NA	203830	826	+	gene	pRL27	TagModule_0106	SOA0003		NA	type II restriction endonuclease, putative (NCBI ptt file)
73296	11	E11	139	2648588	-	0.9634	246	NA	NA	201664	684	+	gene	pRL27	TagModule_0107	SO2523		1629	hypothetical TonB-dependent receptor (NCBI ptt file)
73297	11	F01	139	4879318	-	1	694	NA	NA	203749	569	+	gene	pRL27	TagModule_0099	SO4680		1887	conserved hypothetical protein (NCBI ptt file)
73298	11	F02	139	3596432	-	0.9705	509	NA	NA	NA	NA		between	pRL27	TagModule_0098			NA
73299	11	F03	139	1506473	-	0.9474	298	NA	NA	NA	NA		between	pRL27	TagModule_0099			NA
73300	11	F04	139	1062045	-	0.9589	606	0.9617	599	NA	NA		between	pRL27	TagModule_0100			NA
73301	11	F05	139	3681558	-	0.978	635	NA	NA	202626	121	-	gene	pRL27	TagModule_0101	SO3525		3419	type IV pilin biogenesis protein, putative (NCBI ptt file)
73302	11	F07	139	4438967	+	0.9911	449	NA	NA	203344	648	-	gene	pRL27	TagModule_0103	SO4263		NA	conserved hypothetical protein (NCBI ptt file)
73303	11	F08	140	41682	+	0.993	713	NA	NA	203874	678	-	gene	pRL27	TagModule_0104	SOA0050		1566	toxin secretion, membrane fusion protein (NCBI ptt file)
73304	11	F09	139	1619455	+	1	500	NA	NA	200711	300	-	gene	pRL27	TagModule_0105	SO1543		NA	hypothetical protein (NCBI ptt file)
73305	11	F10	140	92690	-	0.9848	525	NA	NA	203924	2605	+	gene	pRL27	TagModule_0106	SOA0110		NA	lipoprotein, putative (NCBI ptt file)
73306	11	F11	140	69253	-	1	115	1	115	NA	NA		between	pRL27	TagModule_0108			NA
73307	11	F12	140	114640	-	0.97	200	0.97	200	NA	NA		between	pRL27	TagModule_0108			NA
73308	11	G01	139	518728	+	0.9948	572	NA	NA	NA	NA		between	pRL27	TagModule_0099			NA
73309	11	G02	139	4218703	-	0.983	643	NA	NA	203148	479	-	gene	pRL27	TagModule_0098	SO4064		1357	mcbg protein, putative (NCBI ptt file)
73310	11	G03	139	4463141	-	0.9962	521	NA	NA	203362	542	+	gene	pRL27	TagModule_0099	SO4283		1477	apbE family protein (NCBI ptt file)
73311	11	G04	139	1496987	+	0.9962	796	NA	NA	200609	373	-	gene	pRL27	TagModule_0100	SO1434		840	methyl-accepting chemotaxis protein (NCBI ptt file)
73312	11	G05	139	2927671	-	0.9914	232	NA	NA	201935	43	-	gene	pRL27	TagModule_0101	SO2803		2333	DNA internalization-related competence protein ComEC/Rec2 (NCBI ptt file)
73313	11	G06	139	4269453	-	1	436	NA	NA	203194	425	-	gene	pRL27	TagModule_0102	SO4110		NA	MSHA biogenesis protein MshN, putative (NCBI ptt file)
73314	11	G07	139	1654211	-	0.9708	681	NA	NA	NA	NA		between	pRL27	TagModule_0103			NA
73315	11	G08	140	121985	-	0.9886	781	NA	NA	NA	NA		between	pRL27	TagModule_0104			NA
73316	11	G09	139	4016169	-	0.9933	445	NA	NA	NA	NA		between	pRL27	TagModule_0105			NA
73317	11	G10	139	4472070	-	0.977	565	NA	NA	NA	NA		between	pRL27	TagModule_0106			NA
73318	11	G11	139	4465481	+	1	760	NA	NA	NA	NA		between	pRL27	TagModule_0107			NA
73319	11	G12	139	4816012	+	0.9242	264	NA	NA	203690	776	-	gene	pRL27	TagModule_0108	SO4620	ifcA-2	1053	fumarate reductase, flavoprotein subunit precursor (NCBI ptt file)
73320	11	H01	139	1420230	-	0.9923	261	NA	NA	200539	157	+	gene	pRL27	TagModule_0099	SO1364		1018	iron-sulfur cluster-binding protein (NCBI ptt file)
73321	11	H02	139	2803101	-	0.9555	337	NA	NA	201817	1136	+	gene	pRL27	TagModule_0098	SO2679		4373	prophage MuSo2, portal protein, putative (NCBI ptt file)
73322	11	H03	139	1595196	+	0.9946	554	NA	NA	200692	1767	-	gene	pRL27	TagModule_0099	SO1521		277	iron-sulfur cluster-binding protein (NCBI ptt file)
73323	11	H04	139	364556	+	0.994	502	1	130	NA	NA		between	pRL27	TagModule_0100			NA
73324	11	H05	139	2225082	-	0.9255	188	NA	NA	201277	50	+	gene	pRL27	TagModule_0101	SO2120	cheY-1	NA	chemotaxis protein CheY (NCBI ptt file)	YES	YES
73325	11	H06	139	452492	-	0.9524	294	NA	NA	199621	526	+	gene	pRL27	TagModule_0102	SO0429		3590	peptidase, M13 family (NCBI ptt file)
73326	11	H07	139	4463141	-	0.963	135	NA	NA	203362	542	+	gene	pRL27	TagModule_0103	SO4283		1477	apbE family protein (NCBI ptt file)
73327	11	H08	139	503061	-	0.9551	243	NA	NA	199670	423	+	gene	pRL27	TagModule_0104	SO0479		NA	cytochrome c, putative (NCBI ptt file)
73328	11	H09	139	3903812	-	0.9901	506	NA	NA	202847	843	+	gene	pRL27	TagModule_0105	SO3756		1485	hypothetical ATPase (NCBI ptt file)	YES	YES
73329	11	H10	139	2243030	+	1	99	NA	NA	201293	1797	-	gene	pRL27	TagModule_0106	SO2136	adhE	1454	aldehyde-alcohol dehydrogenase (NCBI ptt file)
74254	12	A01	139	4420302	+	0.978	590	NA	NA	203322	310	-	gene	pRL27	TagModule_0109	SO4241	recQ	514	ATP-dependent DNA helicase RecQ (NCBI ptt file)
74255	12	A02	139	2550138	+	0.9616	469	NA	NA	201581	1867	+	gene	pRL27	TagModule_0110	SO2437		NA	hypothetical protein (NCBI ptt file)
74256	12	A03	140	59493	-	0.9985	662	NA	NA	NA	NA		between	pRL27	TagModule_0111			NA
74257	12	A04	139	4766004	-	0.9791	712	NA	NA	203641	315	-	gene	pRL27	TagModule_0112	SO4571		583	transcriptional regulator, LysR family (NCBI ptt file)
74258	12	A05	139	4464964	+	0.9764	550	0.9746	550	NA	NA		between	pRL27	TagModule_0113			NA
74259	12	A06	139	4463149	+	0.9977	428	NA	NA	203362	550	+	gene	pRL27	TagModule_0114	SO4283		1477	apbE family protein (NCBI ptt file)
74260	12	A07	139	4197886	-	0.9744	234	NA	NA	203127	1083	+	gene	pRL27	TagModule_0115	SO4043		NA	TonB domain protein (NCBI ptt file)	YES	YES
74261	12	A08	139	728448	+	0.9569	510	NA	NA	199898	806	-	gene	pRL27	TagModule_0116	SO0710		NA	hypothetical protein (NCBI ptt file)
74262	12	A09	139	3319037	+	0.9887	789	NA	NA	202290	832	-	gene	pRL27	TagModule_0117	SO3180		463	glycosyl transferase, group 2 family protein (NCBI ptt file)
74263	12	A10	139	4631672	+	0.966	470	NA	NA	203518	500	+	gene	pRL27	TagModule_0118	SO4443		NA	hypothetical protein (NCBI ptt file)
74264	12	A11	139	4786631	-	0.9854	749	NA	NA	203662	295	+	gene	pRL27	TagModule_0119	SO4592		NA	hypothetical protein (NCBI ptt file)
74265	12	A12	140	41931	-	0.9891	362	NA	NA	203874	429	-	gene	pRL27	TagModule_0120	SOA0050		1566	toxin secretion, membrane fusion protein (NCBI ptt file)
74266	12	B01	139	525359	+	0.9825	398	NA	NA	199691	1405	-	gene	pRL27	TagModule_0109	SO0500		840	methyl-accepting chemotaxis protein (NCBI ptt file)	YES
74267	12	B02	139	3891366	-	0.9879	579	NA	NA	202838	82	-	gene	pRL27	TagModule_0110	SO3745	rfaE	2870	ADP-heptose synthase (NCBI ptt file)		YES
74268	12	B03	139	898111	-	0.9939	489	NA	NA	200053	2196	+	gene	pRL27	TagModule_0111	SO0867		4935	serine protease, subtilase family (NCBI ptt file)
74269	12	B04	139	2943838	-	0.9955	895	NA	NA	201949	1380	+	gene	pRL27	TagModule_0112	SO2822		3275	sensor histidine kinase (NCBI ptt file)
74270	12	B05	139	2026398	-	0.9832	655	NA	NA	201085	1415	-	gene	pRL27	TagModule_0113	SO1924		841	AcrB/AcrD/AcrF family protein (NCBI ptt file)
74271	12	B06	139	4355113	-	0.975	872	NA	NA	203264	471	-	gene	pRL27	TagModule_0114	SO4182		2802	ATP-dependent protease La (LON) domain protein, putative (NCBI ptt file)
74272	12	B07	140	65759	-	0.9934	300	0.9868	300	NA	NA		between	pRL27	TagModule_0115			NA
74273	12	B08	139	4223784	+	1	353	NA	NA	NA	NA		between	pRL27	TagModule_0116			NA
74274	12	B09	139	89994	+	0.9928	275	NA	NA	199273	999	+	gene	pRL27	TagModule_0117	SO0076		NA	hypothetical protein (NCBI ptt file)
74275	12	B10	139	1541991	-	0.9907	641	NA	NA	200650	47	+	gene	pRL27	TagModule_0118	SO1479		NA	hypothetical protein (NCBI ptt file)
74276	12	B11	139	3972886	-	0.9659	614	NA	NA	202911	652	-	gene	pRL27	TagModule_0119	SO3822		NA	conserved hypothetical protein (NCBI ptt file)
74277	12	B12	139	1944268	-	0.9964	551	NA	NA	201015	1027	+	gene	pRL27	TagModule_0120	SO1853		488	ABC transporter, ATP-binding protein (NCBI ptt file)	YES
74278	12	C01	139	4585525	-	0.9749	859	NA	NA	NA	NA		between	pRL27	TagModule_0109			NA
74279	12	C02	139	2011934	-	0.9983	593	NA	NA	NA	NA		between	pRL27	TagModule_0110			NA
74280	12	C03	139	4580383	-	0.9472	282	NA	NA	203463	62	+	gene	pRL27	TagModule_0111	SO4385		2304	von Willebrand factor type A domain protein (NCBI ptt file)
74281	12	C04	139	2676812	+	0.9269	383	NA	NA	201684	847	+	gene	pRL27	TagModule_0112	SO2544		642	sensor histidine kinase/response regulator (NCBI ptt file)
74282	12	C05	139	4815197	-	0.9833	888	NA	NA	203690	1591	-	gene	pRL27	TagModule_0113	SO4620	ifcA-2	1053	fumarate reductase, flavoprotein subunit precursor (NCBI ptt file)
74283	12	C06	139	4065987	-	0.9953	636	NA	NA	203003	1017	+	gene	pRL27	TagModule_0114	SO3918		NA	conserved hypothetical protein (NCBI ptt file)
74284	12	C07	139	4546927	-	1	252	NA	NA	203432	33	-	gene	pRL27	TagModule_0115	SO4354		727	hypothetical Fe-S-cluster oxidoreductase (NCBI ptt file)
74285	12	C08	139	4548577	+	0.9481	210	NA	NA	203434	1504	-	gene	pRL27	TagModule_0116	SO4356		NA	conserved domain protein (NCBI ptt file)
74286	12	C09	139	3067914	-	0.9984	622	NA	NA	NA	NA		between	pRL27	TagModule_0117			NA
74287	12	C10	140	69253	-	0.9751	399	0.9751	399	NA	NA		between	pRL27	TagModule_0118			NA
74288	12	C12	139	3453872	+	0.9941	505	NA	NA	202411	501	-	gene	pRL27	TagModule_0120	SO3303		NA	chitinase domain protein (NCBI ptt file)
74289	12	D01	139	3858754	-	0.966	786	NA	NA	202805	384	-	gene	pRL27	TagModule_0109	SO3711		3673	conserved hypothetical protein (NCBI ptt file)
74290	12	D02	140	87616	-	1	532	NA	NA	NA	NA		between	pRL27	TagModule_0110			NA
74291	12	D03	140	31300	+	0.9528	508	NA	NA	203865	223	+	gene	pRL27	TagModule_0111	SOA0041		2337	transcriptional regulator, PemK family (NCBI ptt file)
74292	12	D04	140	64079	-	0.9953	430	0.986	430	NA	NA		between	pRL27	TagModule_0112			NA
74293	12	D05	140	52893	+	0.981	735	NA	NA	203888	64	+	gene	pRL27	TagModule_0113	SO_A0065		2801	ISSod1, transposase OrfA (NCBI)	YES	YES
74294	12	D06	139	3441699	-	0.9852	871	NA	NA	202405	671	-	gene	pRL27	TagModule_0114	SO3297		583	transcriptional regulator, LysR family (NCBI ptt file)
74295	12	D07	139	2409744	+	0.9922	512	NA	NA	NA	NA		between	pRL27	TagModule_0115			NA
74296	12	D08	139	1080677	+	1	314	NA	NA	NA	NA		between	pRL27	TagModule_0116			NA
74297	12	D09	139	323548	-	0.9934	754	NA	NA	199511	195	+	gene	pRL27	TagModule_0117	SO0316		1881	hypothetical phosphatidylethanolamine-binding protein (NCBI ptt file)	YES	YES
74298	12	D10	139	4555443	+	0.9886	525	NA	NA	203437	150	-	gene	pRL27	TagModule_0118	SO4359		NA	outer membrane protein, putative (NCBI ptt file)
74299	12	E02	139	3022226	+	0.9907	751	NA	NA	202024	2191	-	gene	pRL27	TagModule_0110	SO2898		1196	SMC family protein (NCBI ptt file)
74300	12	E03	139	800171	+	0.9877	486	NA	NA	NA	NA		between	pRL27	TagModule_0111			NA
74301	12	E04	139	3751806	+	0.9906	636	NA	NA	202682	54	+	gene	pRL27	TagModule_0112	SO3585		431	azoreductase, putative (NCBI ptt file)
74302	12	E05	139	4606540	-	0.9724	721	NA	NA	NA	NA		between	pRL27	TagModule_0113			NA
74303	12	E06	139	3215337	+	0.9962	525	NA	NA	202207	938	+	gene	pRL27	TagModule_0114	SO3090		714	MoxR domain protein (NCBI ptt file)
74304	12	E07	140	64196	-	0.9901	303	0.9835	303	NA	NA		between	pRL27	TagModule_0115			NA
74305	12	E08	139	499685	-	0.9379	575	NA	NA	199668	389	-	gene	pRL27	TagModule_0116	SO0477	nrfF	3088	cytochrome c-type biogenesis protein NrfF precursor (NCBI ptt file)
74306	12	E09	139	1144382	-	0.9908	652	NA	NA	200283	599	+	gene	pRL27	TagModule_0117	SO1102		4772	TonB-dependent receptor C-terminal region domain lipoprotein (NCBI ptt file)
74307	12	E10	140	45731	-	0.9799	695	NA	NA	203878	320	+	overlap	pRL27	TagModule_0118	SOA0054		2801	ISSod1, transposase OrfB (NCBI ptt file)
74308	12	E11	139	1841584	-	0.9895	476	NA	NA	200926	441	-	gene	pRL27	TagModule_0119	SO1762		2207	transcriptional regulator, AraC/XylS family (NCBI ptt file)
74309	12	E12	140	136356	+	0.9836	302	NA	NA	NA	NA		between	pRL27	TagModule_0120			NA
74310	12	F01	139	1523906	-	0.9933	443	NA	NA	200634	110	+	gene	pRL27	TagModule_0109	SO1462		NA	hypothetical protein (NCBI ptt file)		YES
74311	12	F02	139	4556131	-	0.9936	782	NA	NA	203438	388	-	gene	pRL27	TagModule_0110	SO4360		NA	decaheme cytochrome c (NCBI ptt file)
74312	12	F03	139	4531586	+	0.9922	510	NA	NA	203418	357	-	gene	pRL27	TagModule_0111	SO4340		4395	conserved hypothetical protein (NCBI ptt file)		YES
74313	12	F04	139	4579382	+	0.9938	638	NA	NA	203462	83	+	gene	pRL27	TagModule_0112	SO4384		NA	hypothetical protein (NCBI ptt file)		YES
74314	12	F05	139	802344	-	0.9814	899	NA	NA	NA	NA		between	pRL27	TagModule_0113			NA
74315	12	F06	139	3644329	+	0.9793	532	NA	NA	202596	219	-	gene	pRL27	TagModule_0114	SO3493	mexE	845	RND multidrug efflux membrane fusion protein MexE (NCBI ptt file)
74316	12	F07	140	30647	+	0.9963	804	NA	NA	203863	1073	+	gene	pRL27	TagModule_0115	SO_A0039		NA	hypothetical protein (NCBI)
74317	12	F08	139	1985223	+	0.9812	533	NA	NA	201050	369	+	gene	pRL27	TagModule_0116	SO1888		NA	conserved hypothetical protein (NCBI ptt file)		YES
74318	12	F09	139	3289620	-	0.9691	549	NA	NA	NA	NA		between	pRL27	TagModule_0117			NA
74319	12	F10	139	1478490	+	0.9806	562	NA	NA	200595	51	+	gene	pRL27	TagModule_0118	SO1420		3203	outer membrane porin, putative (NCBI ptt file)
74320	12	F11	139	4767294	+	0.9732	708	NA	NA	203643	304	+	gene	pRL27	TagModule_0119	SO4573	menD	1165	2-succinyl-6-hydroxy-2,4-cyclohexadiene-1-carboxylic acid synthase/2-oxoglutarate decarboxylase (NCBI ptt file)	YES
74321	12	F12	139	4531879	-	1	529	NA	NA	203418	64	-	gene	pRL27	TagModule_0120	SO4340		4395	conserved hypothetical protein (NCBI ptt file)		YES
74322	12	G01	139	4365906	+	0.9769	643	NA	NA	203280	173	+	gene	pRL27	TagModule_0109	SO4198		10	arginase family protein (NCBI ptt file)
74323	12	G02	140	88491	+	0.9955	447	NA	NA	NA	NA		between	pRL27	TagModule_0110			NA
74324	12	G03	139	4405627	+	0.9547	508	NA	NA	203312	1309	-	gene	pRL27	TagModule_0111	SO4230	glpK	554	glycerol kinase (NCBI ptt file)	YES
74325	12	G04	139	3862236	-	0.9659	291	NA	NA	202808	158	-	gene	pRL27	TagModule_0112	SO3714		1879	sugar-binding protein, putative (NCBI ptt file)	YES
74326	12	G05	139	3850288	-	1	686	NA	NA	NA	NA		between	pRL27	TagModule_0113			NA
74327	12	G06	139	3488849	-	0.9857	487	NA	NA	202449	312	+	gene	pRL27	TagModule_0114	SO3341		2077	antioxidant, AhpC/TSA family (NCBI ptt file)	YES	YES
74328	12	G07	139	35452	+	1	491	NA	NA	199227	965	-	gene	pRL27	TagModule_0115	SO0030	sun	144	sun protein (NCBI ptt file)
74329	12	G08	139	2055045	-	0.9903	512	NA	NA	201110	3029	+	gene	pRL27	TagModule_0116	SO1949		NA	invasin domain protein (NCBI ptt file)
74330	12	G09	139	4297427	-	0.9842	758	NA	NA	NA	NA		between	pRL27	TagModule_0117			NA
74331	12	G10	139	3414972	+	0.9949	394	NA	NA	202382	269	+	gene	pRL27	TagModule_0118	SO3274		NA	conserved hypothetical protein (NCBI ptt file)	YES	YES
74332	12	G11	139	1831310	-	0.9643	504	NA	NA	200914	492	+	gene	pRL27	TagModule_0119	SO1750		1131	ABC transporter, ATP-binding protein (NCBI ptt file)		YES
74333	12	G12	139	4766643	-	0.9949	585	NA	NA	203642	146	+	gene	pRL27	TagModule_0120	SO4572		NA	cytochrome c, putative (NCBI ptt file)
74334	12	H01	140	124840	+	0.9816	270	NA	NA	NA	NA		between	pRL27	TagModule_0109			NA
74335	12	H02	139	3647942	+	0.9919	245	NA	NA	202600	21	+	gene	pRL27	TagModule_0110	SO3497		161	aminotransferase, class III (NCBI ptt file)	YES
74336	12	H03	139	3547886	+	0.9273	55	NA	NA	NA	NA		between	pRL27	TagModule_0111			NA
74337	12	H04	139	2250344	+	1	275	NA	NA	201298	901	+	gene	pRL27	TagModule_0112	SO2143		2985	conserved hypothetical protein (NCBI ptt file)
74338	12	H05	139	1133565	-	0.9828	348	NA	NA	200275	253	-	gene	pRL27	TagModule_0113	SO1094		NA	hypothetical Transcription elongation factor (NCBI ptt file)
74339	12	H07	139	774051	+	0.9939	493	NA	NA	199943	370	-	gene	pRL27	TagModule_0115	SO0757		NA	TPR domain protein (NCBI ptt file)
74340	12	H08	139	2238337	-	1	221	NA	NA	201289	36	+	gene	pRL27	TagModule_0116	SO2132		NA	hypothetical protein (NCBI ptt file)
74341	12	H09	139	4546955	-	1	224	NA	NA	203432	5	-	gene	pRL27	TagModule_0117	SO4354		727	hypothetical Fe-S-cluster oxidoreductase (NCBI ptt file)
74342	12	H10	139	98833	+	1	373	NA	NA	199287	46	+	gene	pRL27	TagModule_0118	SO0090		3453	hypothetical protein (NCBI ptt file)
74343	12	H11	139	3562649	-	0.9957	466	NA	NA	NA	NA		between	pRL27	TagModule_0119			NA
75259	13	A02	139	3789791	-	0.9851	672	NA	NA	202727	503	-	gene	pRL27	TagModule_0122	SO3631	hprA	1052	glycerate dehydrogenase (NCBI ptt file)	YES	YES
75260	13	A03	139	4703090	+	1	573	NA	NA	203583	2613	+	gene	pRL27	TagModule_0123	SO4509		243	formate dehydrogenase, alpha subunit (NCBI ptt file)
75261	13	A04	139	808842	+	0.995	803	NA	NA	NA	NA		between	pRL27	TagModule_0124			NA
75262	13	A05	139	4583703	-	0.9882	338	NA	NA	203465	671	+	gene	pRL27	TagModule_0125	SO4387		642	sensor histidine kinase (NCBI ptt file)
75263	13	A06	140	120585	-	0.9896	576	0.9913	577	NA	NA		between	pRL27	TagModule_0126			NA
75264	13	A07	139	1945206	-	0.9887	264	NA	NA	201016	14	+	gene	pRL27	TagModule_0127	SO1854		NA	hypothetical protein (NCBI ptt file)
75265	13	A08	139	582030	-	0.9485	425	NA	NA	199751	1535	+	gene	pRL27	TagModule_0128	SO0560	fhs	2759	formate--tetrahydrofolate ligase (NCBI ptt file)
75266	13	A09	139	4904449	-	0.9928	415	NA	NA	203771	721	+	gene	pRL27	TagModule_0129	SO4702	gor	1249	glutathione reductase (NCBI ptt file)
75267	13	A10	139	98901	+	1	441	NA	NA	199287	114	+	gene	pRL27	TagModule_0130	SO0090		3453	hypothetical protein (NCBI ptt file)
75268	13	A11	139	4704521	-	0.9905	634	NA	NA	203585	522	+	gene	pRL27	TagModule_0131	SO4511		2864	formate dehydrogenase, C subunit, putative (NCBI ptt file)
75269	13	A12	139	1128788	+	1	299	NA	NA	200271	240	+	gene	pRL27	TagModule_0132	SO1090		1477	ApbE family protein, putative (NCBI ptt file)
75270	13	B01	139	797682	-	1	554	NA	NA	199969	1727	-	gene	pRL27	TagModule_0121	SO0783		3972	hypothetical protein (NCBI ptt file)
75271	13	B02	139	2227288	-	1	602	NA	NA	201278	1874	+	gene	pRL27	TagModule_0122	SO2121	cheA	643	chemotaxis protein CheA (NCBI ptt file)
75272	13	B03	139	3700568	+	0.9938	799	1	445	NA	NA		between	pRL27	TagModule_0123			NA
75273	13	B04	139	1732057	-	0.9843	633	NA	NA	200811	143	-	gene	pRL27	TagModule_0124	SO1646		2199	GGDEF family protein (NCBI ptt file)	YES	YES
75274	13	B05	139	4766746	-	0.9835	718	NA	NA	203642	249	+	gene	pRL27	TagModule_0125	SO4572		NA	cytochrome c, putative (NCBI ptt file)
75275	13	B06	140	129370	-	1	115	NA	NA	203946	615	+	gene	pRL27	TagModule_0126	SOA0141		2849	hypothetical protein (NCBI ptt file)
75276	13	B07	139	3321959	+	0.9985	663	NA	NA	202293	782	-	gene	pRL27	TagModule_0127	SO3183		399	perosamine synthetase-related protein (NCBI ptt file)
75277	13	B08	139	3304808	+	0.9667	60	NA	NA	202278	357	-	gene	pRL27	TagModule_0128	SO3168		NA	DnaJ domain protein (NCBI ptt file)	YES	YES
75278	13	B09	139	2935740	+	0.9547	681	NA	NA	NA	NA		between	pRL27	TagModule_0129			NA
75279	13	B10	139	707599	+	0.9893	559	NA	NA	199876	1684	+	gene	pRL27	TagModule_0130	SO0688		NA	hypothetical protein (NCBI ptt file)
75280	13	B11	140	146866	-	1	762	NA	NA	203962	327	-	gene	pRL27	TagModule_0131	SO_A0158		NA	hypothetical protein (NCBI)
75281	13	B12	139	2172981	-	0.9636	549	NA	NA	201232	359	-	gene	pRL27	TagModule_0132	SO2075		NA	hypothetical protein (NCBI ptt file)
75282	13	C01	139	3626435	-	1	230	NA	NA	202582	670	-	gene	pRL27	TagModule_0121	SO3479		NA	hypothetical protein (NCBI ptt file)
75283	13	C02	139	4221932	+	0.9838	915	NA	NA	203152	488	+	gene	pRL27	TagModule_0122	SO4068		NA	hypothetical protein (NCBI ptt file)
75284	13	C03	139	801079	-	0.9889	630	NA	NA	199972	155	-	gene	pRL27	TagModule_0123	SO0786		NA	hypothetical protein (NCBI ptt file)
75285	13	C04	139	1480749	-	0.9935	462	NA	NA	200596	622	-	gene	pRL27	TagModule_0124	SO1421	ifcA-1	1053	fumarate reductase flavoprotein subunit (NCBI ptt file)
75286	13	C05	139	689930	-	0.9187	246	NA	NA	199859	66	+	gene	pRL27	TagModule_0125	SO0671		NA	hypothetical protein (NCBI ptt file)		YES
75287	13	C06	139	2102112	-	0.9897	480	NA	NA	201163	30	+	gene	pRL27	TagModule_0126	SO2002		NA	hypothetical protein (NCBI ptt file)
75288	13	C07	139	4019053	-	0.969	452	NA	NA	202958	997	+	gene	pRL27	TagModule_0127	SO3872		NA	arylsulfate sulfotransferase (NCBI ptt file)
75289	13	C08	140	60359	+	0.9789	793	NA	NA	203899	622	-	gene	pRL27	TagModule_0128	SOA0077		1961	site-specific recombinase, resolvase family (NCBI ptt file)
75290	13	C09	139	651558	-	0.9945	544	NA	NA	NA	NA		between	pRL27	TagModule_0129			NA
75291	13	C11	139	2222912	-	0.9768	721	NA	NA	201274	1022	+	gene	pRL27	TagModule_0131	SO2117		840	methyl-accepting chemotaxis protein (NCBI ptt file)
75292	13	C12	140	108540	+	0.9247	237	0.9331	237	NA	NA		between	pRL27	TagModule_0132			NA
75293	13	D01	139	4536026	+	0.9278	516	NA	NA	203422	1267	-	gene	pRL27	TagModule_0121	SO4344	ilvA	1171	threonine dehydratase (NCBI ptt file)
75294	13	D02	139	1079934	-	0.9947	378	NA	NA	NA	NA		between	pRL27	TagModule_0122			NA
75295	13	D03	140	151569	+	0.982	444	NA	NA	NA	NA		between	pRL27	TagModule_0123			NA
75296	13	D04	139	4460675	+	0.9897	482	NA	NA	203360	94	+	gene	pRL27	TagModule_0124	SO4281		569	potassium uptake protein KtrA, putative (NCBI ptt file)
75297	13	D05	139	4462892	+	1	163	NA	NA	203362	293	+	gene	pRL27	TagModule_0125	SO4283		1477	apbE family protein (NCBI ptt file)
75298	13	D06	140	108835	+	0.9582	550	0.9545	550	NA	NA		between	pRL27	TagModule_0126			NA
75299	13	D08	139	3769269	-	1	454	NA	NA	202705	820	-	gene	pRL27	TagModule_0128	SO3608		NA	serine/threonine protein kinase (NCBI ptt file)
75300	13	D09	139	1167953	-	0.954	456	NA	NA	200305	488	-	gene	pRL27	TagModule_0129	SO1125		NA	integral membrane domain protein (NCBI ptt file)	YES
75301	13	D10	139	566391	+	1	604	NA	NA	199735	1927	+	gene	pRL27	TagModule_0130	SO0544		NA	sensory box histidine kinase (NCBI ptt file)
75302	13	D11	139	1617071	-	0.9674	428	0.9674	428	NA	NA		between	pRL27	TagModule_0131			NA
75303	13	D12	139	1783616	+	0.9739	307	NA	NA	200860	577	-	gene	pRL27	TagModule_0132	SO1695		NA	sensory box/GGDEF family protein (NCBI ptt file)
75304	13	E01	139	1062103	-	0.9848	523	0.9848	523	NA	NA		between	pRL27	TagModule_0121			NA
75305	13	E02	139	578989	-	1	627	NA	NA	NA	NA		between	pRL27	TagModule_0122			NA
75306	13	E03	139	341740	-	0.9808	774	NA	NA	199536	4267	-	gene	pRL27	TagModule_0123	SO0341		5001	sensory box protein (NCBI ptt file)
75307	13	E05	139	4223824	-	0.9795	869	NA	NA	NA	NA		between	pRL27	TagModule_0125			NA
75308	13	E06	139	743835	+	0.9807	620	NA	NA	NA	NA		between	pRL27	TagModule_0126			NA
75309	13	E07	139	307959	-	0.9527	423	NA	NA	NA	NA		between	pRL27	TagModule_0127			NA
75310	13	E08	139	2114574	+	0.9854	615	NA	NA	201176	150	+	gene	pRL27	TagModule_0128	SO2016	htpG	326	heat shock protein HtpG (NCBI ptt file)
75311	13	E09	139	3165241	+	0.9548	975	NA	NA	202171	962	-	gene	pRL27	TagModule_0129	SO3052		840	methyl-accepting chemotaxis protein (NCBI ptt file)
75312	13	E10	139	4267255	+	0.968	685	NA	NA	203193	1337	-	gene	pRL27	TagModule_0130	SO4109	mshE	2804	MSHA biogenesis protein MshE (NCBI ptt file)
75313	13	E11	139	1505697	+	0.9801	848	NA	NA	200614	760	+	gene	pRL27	TagModule_0131	SO1442		NA	conserved hypothetical protein (NCBI ptt file)
75314	13	E12	139	4555272	+	1	351	NA	NA	203437	321	-	gene	pRL27	TagModule_0132	SO4359		NA	outer membrane protein, putative (NCBI ptt file)
75315	13	F01	139	4705555	+	0.9782	687	NA	NA	203586	148	+	gene	pRL27	TagModule_0121	SO4512		NA	conserved hypothetical protein (NCBI ptt file)	YES
75316	13	F02	139	1133576	+	0.9616	358	NA	NA	200275	242	-	gene	pRL27	TagModule_0122	SO1094		NA	hypothetical Transcription elongation factor (NCBI ptt file)
75317	13	F03	139	969165	-	0.9807	969	NA	NA	200121	347	+	gene	pRL27	TagModule_0123	SO0937		NA	hypothetical protein (NCBI ptt file)	YES	YES
75318	13	F04	139	1506164	+	0.9955	443	NA	NA	200614	1227	+	gene	pRL27	TagModule_0124	SO1442		NA	conserved hypothetical protein (NCBI ptt file)
75319	13	F05	139	4852061	+	0.9839	803	NA	NA	203726	449	-	gene	pRL27	TagModule_0125	SO4656		NA	hypothetical protein (NCBI ptt file)	YES
75320	13	F06	139	1430833	-	0.9937	791	NA	NA	200549	209	-	gene	pRL27	TagModule_0126	SO1374		456	acetyltransferase, GNAT family (NCBI ptt file)	YES	YES
75321	13	F07	139	2571886	+	0.9723	824	NA	NA	201599	868	-	gene	pRL27	TagModule_0127	SO2455		583	transcriptional regulator, LysR family (NCBI ptt file)	YES	YES
75322	13	F08	139	366289	-	0.9951	407	NA	NA	199552	495	+	gene	pRL27	TagModule_0128	SO0357		2015	metallo-beta-lactamase superfamily protein (NCBI ptt file)
75323	13	F09	139	4041387	+	1	452	1	129	NA	NA		between	pRL27	TagModule_0129			NA
75324	13	F10	139	1506839	-	0.9389	606	NA	NA	200615	87	+	gene	pRL27	TagModule_0130	SO1443		NA	conserved hypothetical protein (NCBI ptt file)
75325	13	F11	139	449242	+	0.9704	835	NA	NA	199619	4414	+	gene	pRL27	TagModule_0131	SO0427		5001	sensory box protein (NCBI ptt file)
75326	13	F12	140	22048	-	0.9476	227	0.9474	226	NA	NA		between	pRL27	TagModule_0132			NA
75327	13	G01	139	455033	-	0.9612	258	NA	NA	199623	325	-	gene	pRL27	TagModule_0121	SO0431		637	HAD-superfamily hydrolase, subfamily IA, variant 3 protein family (NCBI ptt file)		YES
75328	13	G02	139	3312180	+	1	647	NA	NA	202284	169	-	gene	pRL27	TagModule_0122	SO3174		438	glycosyl transferase, group 1 family protein (NCBI ptt file)
75329	13	G03	139	2284487	-	0.9704	871	NA	NA	NA	NA		between	pRL27	TagModule_0123			NA
75330	13	G04	139	4623722	-	0.9472	749	NA	NA	203509	343	+	gene	pRL27	TagModule_0124	SO4434		NA	hypothetical protein (NCBI ptt file)
75331	13	G05	139	1505613	-	1	472	NA	NA	200614	676	+	gene	pRL27	TagModule_0125	SO1442		NA	conserved hypothetical protein (NCBI ptt file)
75332	13	G06	140	133587	-	0.9531	339	0.9531	339	NA	NA		between	pRL27	TagModule_0126			NA
75333	13	G07	139	802134	+	0.9949	198	NA	NA	NA	NA		between	pRL27	TagModule_0127			NA
75334	13	G08	139	3448581	+	0.994	500	NA	NA	202410	3340	-	gene	pRL27	TagModule_0128	SO3302		NA	serine protease, subtilase family (NCBI ptt file)
75335	13	G09	139	4818854	-	0.9906	632	NA	NA	203692	207	-	gene	pRL27	TagModule_0129	SO4622		642	sensor histidine kinase (NCBI ptt file)
75336	13	G10	139	1908269	-	0.9887	351	NA	NA	200981	1599	-	gene	pRL27	TagModule_0130	SO1819	dinG	1199	ATP-dependent helicase DinG (NCBI ptt file)
75337	13	G11	139	533995	-	1	555	NA	NA	NA	NA		between	pRL27	TagModule_0131			NA
75338	13	G12	139	4633488	-	0.9499	613	NA	NA	203520	718	+	gene	pRL27	TagModule_0132	SO4445		642	response regulator/sensor histidine kinase (NCBI ptt file)	YES	YES
75339	13	H01	139	739102	+	0.971	276	NA	NA	199913	608	+	gene	pRL27	TagModule_0121	SO0725	katG-1	376	catalase/peroxidase HPI (NCBI ptt file)
75340	13	H02	139	3409507	+	0.903	299	NA	NA	202378	371	-	gene	pRL27	TagModule_0122	SO3270		399	polysaccharide biosynthesis protein (NCBI ptt file)
75341	13	H03	140	69676	-	0.9964	553	0.9964	553	NA	NA		between	pRL27	TagModule_0123			NA
75342	13	H04	139	3451499	+	0.9873	550	NA	NA	202410	422	-	gene	pRL27	TagModule_0124	SO3302		NA	serine protease, subtilase family (NCBI ptt file)
75343	13	H05	139	2677619	+	0.9844	513	NA	NA	201684	1654	+	gene	pRL27	TagModule_0125	SO2544		642	sensor histidine kinase/response regulator (NCBI ptt file)
75344	13	H06	140	41735	+	0.9801	300	NA	NA	203874	625	-	gene	pRL27	TagModule_0126	SOA0050		1566	toxin secretion, membrane fusion protein (NCBI ptt file)
75345	13	H07	139	3454934	-	0.9687	381	NA	NA	202413	257	-	gene	pRL27	TagModule_0127	SO3305		2197	DNA-binding response regulator, LuxR family (NCBI ptt file)
75346	13	H08	139	3205886	+	1	509	NA	NA	202201	851	+	gene	pRL27	TagModule_0128	SO3084		5001	sensory box protein (NCBI ptt file)
75347	13	H09	139	4897642	+	0.9746	551	0.9227	232	NA	NA		between	pRL27	TagModule_0129			NA
75348	13	H10	139	280705	+	0.9972	711	NA	NA	199470	181	+	gene	pRL27	TagModule_0130	SO0275	argC	2	N-acetyl-gamma-glutamyl-phosphate reductase (NCBI ptt file)	YES	YES
75349	13	H11	139	4425358	+	0.9795	676	NA	NA	203329	595	-	gene	pRL27	TagModule_0131	SO4248	radC	2003	DNA repair protein RadC (NCBI ptt file)	YES	YES
75350	13	H12	139	1478482	-	0.9733	75	NA	NA	200595	43	+	gene	pRL27	TagModule_0132	SO1420		3203	outer membrane porin, putative (NCBI ptt file)
76267	14	A01	139	3409748	-	0.9639	192	NA	NA	202378	130	-	gene	pRL27	TagModule_0133	SO3270		399	polysaccharide biosynthesis protein (NCBI ptt file)
76268	14	A02	139	3758632	-	0.997	335	NA	NA	202692	1270	+	gene	pRL27	TagModule_0134	SO3595		642	sensor protein RstB, putative (NCBI ptt file)		YES
76269	14	A03	139	2577482	-	0.9746	473	NA	NA	201603	1507	+	gene	pRL27	TagModule_0135	SO2459	cga	3387	glucoamylase (NCBI ptt file)
76270	14	A04	140	135612	+	0.9928	415	NA	NA	2200911	134	+	gene	pRL27	TagModule_0172	SO_A0183		NA	hypothetical protein (NCBI)
76271	14	A05	139	2104098	+	1	241	NA	NA	201164	395	+	gene	pRL27	TagModule_0137	SO2004		NA	TonB-dependent receptor C-terminal region domain protein (NCBI ptt file)
76272	14	A06	139	4717752	-	0.9716	940	NA	NA	203597	1366	-	gene	pRL27	TagModule_0138	SO4523	irgA	4771	iron-regulated outer membrane virulence protein (NCBI ptt file)
76273	14	A07	139	3289620	-	0.9891	550	NA	NA	NA	NA		between	pRL27	TagModule_0117			NA
76274	14	A08	139	3161296	-	0.9703	567	NA	NA	202167	749	-	gene	pRL27	TagModule_0140	SO3048		1529	isoquinoline 1-oxidoreductase, beta subunit, putative (NCBI ptt file)
76275	14	A09	140	31949	+	0.9912	226	NA	NA	203866	410	+	gene	pRL27	TagModule_0141	SOA0042		NA	hypothetical protein (NCBI ptt file)
76276	14	A11	139	4709796	+	0.9516	122	NA	NA	203589	643	+	gene	pRL27	TagModule_0143	SO4515		2864	formate dehydrogenase, C subunit, putative (NCBI ptt file)	YES
76277	14	A12	139	4344285	-	0.9524	126	NA	NA	203254	349	-	gene	pRL27	TagModule_0156	SO4171		NA	hypothetical protein (NCBI ptt file)
76278	14	B02	139	1156130	-	0.9678	466	NA	NA	370305	1124	+	gene	pRL27	TagModule_0134	SO1112.1		NA	hypothetical chemotactic transducer (NCBI ptt file)
76279	14	B03	139	3996003	+	1	509	NA	NA	202932	608	+	gene	pRL27	TagModule_0135	SO3846		NA	conserved hypothetical protein (NCBI ptt file)
76280	14	B04	139	393654	-	0.9621	632	NA	NA	199573	973	-	gene	pRL27	TagModule_0172	SO0380	hsdR-1	610	type I restriction-modification system, R subunit (NCBI ptt file)
76281	14	B05	139	4766012	+	1	128	NA	NA	203641	307	-	gene	pRL27	TagModule_0137	SO4571		583	transcriptional regulator, LysR family (NCBI ptt file)
76282	14	B06	140	37891	-	1	726	NA	NA	NA	NA		between	pRL27	TagModule_0138			NA
76283	14	B07	139	89994	+	0.9421	363	NA	NA	199273	999	+	gene	pRL27	TagModule_0117	SO0076		NA	hypothetical protein (NCBI ptt file)
76284	14	B08	139	4635461	-	0.9972	720	NA	NA	203520	2691	+	gene	pRL27	TagModule_0140	SO4445		642	response regulator/sensor histidine kinase (NCBI ptt file)
76285	14	B09	139	2213905	-	1	581	NA	NA	201270	1955	-	gene	pRL27	TagModule_0141	SO2113		2911	conserved hypothetical protein (NCBI ptt file)
76286	14	B12	139	4039809	+	0.9289	420	NA	NA	202979	1286	+	gene	pRL27	TagModule_0144	SO3894		NA	sensor histidine kinase (NCBI ptt file)
76287	14	C01	139	2092604	+	0.987	613	NA	NA	201151	550	-	gene	pRL27	TagModule_0133	SO1990		NA	hypothetical protein (NCBI ptt file)	YES
76288	14	C02	140	36778	-	1	644	NA	NA	203872	1066	-	gene	pRL27	TagModule_0134	SOA0048		1506	prolyl oligopeptidase family protein (NCBI ptt file)
76289	14	C03	140	35853	+	0.9817	764	NA	NA	NA	NA		between	pRL27	TagModule_0135			NA
76290	14	C04	139	3487299	+	0.9862	576	NA	NA	202447	323	+	gene	pRL27	TagModule_0172	SO3339		NA	OmpA family protein (NCBI ptt file)		YES
76291	14	C05	140	126032	+	0.9807	820	NA	NA	203944	814	+	gene	pRL27	TagModule_0137	SO_A0139		NA	hypothetical protein (NCBI)
76292	14	C06	139	494631	-	0.9744	956	NA	NA	NA	NA		between	pRL27	TagModule_0138			NA
76293	14	C07	139	4463149	+	0.94	400	NA	NA	203362	550	+	gene	pRL27	TagModule_0139	SO4283		1477	apbE family protein (NCBI ptt file)
76294	14	C08	139	707245	-	0.9889	891	NA	NA	199876	1330	+	gene	pRL27	TagModule_0140	SO0688		NA	hypothetical protein (NCBI ptt file)
76295	14	C09	139	4439911	+	1	355	NA	NA	203345	1202	-	gene	pRL27	TagModule_0141	SO4264	hsdS-2	732	type I restriction-modification system, S subunit (NCBI ptt file)
76296	14	C10	139	3480108	-	0.9157	83	NA	NA	202441	787	+	gene	pRL27		SO3333		1653	transporter, putative (NCBI ptt file)
76297	14	C12	139	1079654	+	0.9374	685	NA	NA	NA	NA		between	pRL27	TagModule_0144			NA
76298	14	D01	139	1096873	-	0.9812	945	NA	NA	NA	NA		between	pRL27	TagModule_0133			NA
76299	14	D02	139	4325657	-	0.982	608	NA	NA	203233	861	+	gene	pRL27	TagModule_0134	SO4150		659	transporter, putative (NCBI ptt file)	YES
76300	14	D03	140	62681	+	0.9939	489	NA	NA	NA	NA		between	pRL27	TagModule_0135			NA
76301	14	D04	139	2832186	+	0.9722	853	NA	NA	NA	NA		between	pRL27	TagModule_0172			NA
76302	14	D05	139	1501125	-	0.9965	568	1	129	NA	NA		between	pRL27	TagModule_0137			NA
76303	14	D06	139	3768231	+	0.9903	614	0.9938	480	NA	NA		between	pRL27	TagModule_0138			NA
76304	14	D07	139	4041387	+	1	452	1	129	NA	NA		between	pRL27	TagModule_0129			NA
76305	14	D08	139	4556370	-	0.9806	721	NA	NA	203438	149	-	gene	pRL27	TagModule_0140	SO4360		NA	decaheme cytochrome c (NCBI ptt file)
76306	14	D11	139	4463766	+	0.9465	683	NA	NA	NA	NA		between	pRL27				NA
76307	14	D12	139	1579615	+	0.9067	222	NA	NA	200676	108	-	gene	pRL27	TagModule_0144	SO1505		3104	transporter, putative (NCBI ptt file)		YES
76308	14	E01	139	1769309	+	0.9721	911	NA	NA	NA	NA		between	pRL27	TagModule_0133			NA
76309	14	E02	139	2874098	-	0.9974	777	NA	NA	201891	1333	-	gene	pRL27	TagModule_0134	SO2753		1505	prolyl endopeptidase (NCBI ptt file)
76310	14	E03	139	4155087	-	0.9923	519	NA	NA	203097	1809	-	gene	pRL27	TagModule_0135	SO4013		NA	hypothetical protein (NCBI ptt file)
76311	14	E04	139	3103135	+	0.9902	204	NA	NA	202093	60	-	gene	pRL27	TagModule_0172	SO2970		NA	hypothetical protein (NCBI ptt file)
76312	14	E05	139	2053895	+	0.9981	539	NA	NA	201110	1879	+	gene	pRL27	TagModule_0137	SO1949		NA	invasin domain protein (NCBI ptt file)
76313	14	E06	139	4543591	+	0.9862	575	NA	NA	203428	174	+	gene	pRL27	TagModule_0138	SO4350	ilvY	583	transcriptional regulator ilvY (NCBI ptt file)
76314	14	E08	139	4463149	+	1	420	NA	NA	203362	550	+	gene	pRL27	TagModule_0140	SO4283		1477	apbE family protein (NCBI ptt file)
76315	14	E09	140	135269	-	0.9964	275	NA	NA	NA	NA		between	pRL27	TagModule_0141			NA
76316	14	E11	139	4763127	+	0.9243	368	NA	NA	203638	107	+	gene	pRL27	TagModule_0143	SO4567		1522	transcriptional regulator, AsnC family (NCBI ptt file)		YES
76317	14	F01	139	4264076	-	0.9944	534	NA	NA	203189	232	-	gene	pRL27	TagModule_0133	SO4105	mshA	NA	MSHA pilin protein MshA (NCBI ptt file)		YES
76318	14	F02	139	3010960	+	0.9883	593	NA	NA	202014	40	-	gene	pRL27	TagModule_0134	SO2888		NA	hypothetical protein (NCBI ptt file)
76319	14	F04	139	1844785	-	0.9876	878	NA	NA	200930	30	+	gene	pRL27	TagModule_0172	SO1766		NA	hypothetical protein (NCBI ptt file)
76320	14	F05	140	125927	-	0.9964	823	NA	NA	203944	709	+	gene	pRL27	TagModule_0137	SO_A0139		NA	hypothetical protein (NCBI)
76321	14	F07	139	292993	+	0.9932	587	NA	NA	199480	1426	+	gene	pRL27	TagModule_0139	SO0285		4796	type IV pilus biogenesis protein PilQ (NCBI ptt file)
76322	14	F08	139	3676238	+	0.9716	457	1	129	NA	NA		between	pRL27	TagModule_0140			NA
76323	14	F09	139	3471371	+	1	575	NA	NA	202426	686	-	gene	pRL27	TagModule_0141	SO3318		583	transcriptional regulator, LysR family (NCBI ptt file)	YES	YES
76324	14	G01	139	4339766	+	0.998	497	NA	NA	203249	430	-	gene	pRL27	TagModule_0133	SO4166		NA	hypothetical protein (NCBI ptt file)
76325	14	G02	140	88181	-	0.9637	765	NA	NA	NA	NA		between	pRL27	TagModule_0134			NA
76326	14	G03	139	4765659	-	0.9759	249	NA	NA	203641	660	-	gene	pRL27	TagModule_0135	SO4571		583	transcriptional regulator, LysR family (NCBI ptt file)
76327	14	G04	139	2967527	+	0.9777	577	NA	NA	201975	455	-	gene	pRL27	TagModule_0172	SO2849		NA	acetyltransferase, GNAT family (NCBI ptt file)	YES
76328	14	G05	140	66678	-	1	329	NA	NA	203905	447	-	gene	pRL27	TagModule_0137	SOA0086		1961	site-specific recombinase, resolvase family (NCBI ptt file)
76329	14	G06	139	2991146	-	1	195	NA	NA	NA	NA		between	pRL27	TagModule_0138			NA
76330	14	G07	139	4041387	+	0.9978	456	1	129	NA	NA		between	pRL27	TagModule_0129			NA
76331	14	G08	139	103530	-	0.9914	692	NA	NA	199292	230	-	gene	pRL27	TagModule_0140	SO0095	hutI	1228	imidazolonepropionase (NCBI ptt file)
76332	14	G09	139	4458663	-	1	548	NA	NA	NA	NA		between	pRL27	TagModule_0141			NA
76333	14	G10	140	44542	+	0.9585	506	NA	NA	NA	NA		between	pRL27	TagModule_0142			NA
76334	14	G12	139	4339785	+	0.9352	385	NA	NA	203249	411	-	gene	pRL27	TagModule_0144	SO4166		NA	hypothetical protein (NCBI ptt file)	YES
76335	14	H01	139	2834876	+	0.9261	406	NA	NA	NA	NA		between	pRL27	TagModule_0133			NA
76336	14	H02	139	4770311	+	0.9834	541	NA	NA	203645	749	+	gene	pRL27	TagModule_0134	SO4575	menC	1441	O-succinylbenzoate-CoA synthase (NCBI ptt file)
76337	14	H03	140	31251	-	0.9977	437	NA	NA	203865	174	+	gene	pRL27	TagModule_0135	SOA0041		2337	transcriptional regulator, PemK family (NCBI ptt file)
76338	14	H04	139	4019399	+	1	585	NA	NA	202958	1343	+	gene	pRL27	TagModule_0172	SO3872		NA	arylsulfate sulfotransferase (NCBI ptt file)
76339	14	H05	139	3232829	+	0.9755	487	NA	NA	202221	266	+	gene	pRL27	TagModule_0137	SO3105	pspE-1	607	phage shock protein E (NCBI ptt file)
76340	14	H06	139	3768899	-	0.9944	710	1	70	NA	NA		between	pRL27	TagModule_0138			NA
76341	14	H07	139	292997	+	0.9705	643	NA	NA	199480	1430	+	gene	pRL27	TagModule_0104	SO0285		4796	type IV pilus biogenesis protein PilQ (NCBI ptt file)
76342	14	H08	139	758084	-	0.9618	521	NA	NA	199927	1170	-	gene	pRL27	TagModule_0140	SO0741	ggt-1	405	gamma-glutamyltranspeptidase (NCBI ptt file)	YES	YES
76343	14	H09	139	4471428	-	0.992	125	NA	NA	203371	430	-	gene	pRL27	TagModule_0141	SO4292	pstS	226	phosphate ABC transporter, periplasmic phosphate-binding protein (NCBI ptt file)
76344	14	H11	140	136348	-	0.9476	267	NA	NA	NA	NA		between	pRL27	TagModule_0143			NA
77122	15	A01	139	2848937	-	0.98	399	0.9751	399	NA	NA		between	pRL27	TagModule_0145			NA
77123	15	A02	139	2765303	-	0.9703	671	NA	NA	201768	1445	-	gene	pRL27	TagModule_0146	SO2629	icd	2838	isocitrate dehydrogenase, NADP-dependent (NCBI ptt file)
77124	15	A03	140	116704	-	0.991	882	NA	NA	203939	269	-	gene	pRL27	TagModule_0147	SOA0132		3710	conserved hypothetical protein (NCBI ptt file)
77125	15	A04	139	554848	-	0.9939	492	NA	NA	199725	36	+	gene	pRL27	TagModule_0136	SO0534		798	arsenical pump membrane protein, putative (NCBI ptt file)		YES
77126	15	A05	139	4549561	+	0.9861	361	NA	NA	203434	520	-	gene	pRL27	TagModule_0149	SO4356		NA	conserved domain protein (NCBI ptt file)
77127	15	A06	139	4061955	-	0.9835	539	NA	NA	203000	312	+	gene	pRL27	TagModule_0150	SO3915		1406	conserved hypothetical protein (NCBI ptt file)	YES
77128	15	A07	139	2895351	+	0.996	499	NA	NA	201907	316	-	gene	pRL27	TagModule_0151	SO2772		1607	cytosolic long-chain acyl-CoA thioester hydrolase family protein (NCBI ptt file)	YES
77129	15	A08	139	277947	+	1	175	NA	NA	199469	1878	-	gene	pRL27	TagModule_0152	SO0274	ppc	2352	phosphoenolpyruvate carboxylase (NCBI ptt file)
77130	15	A10	139	1289455	-	0.995	600	NA	NA	200416	995	-	gene	pRL27	TagModule_0154	SO1238		3176	acyltransferase family protein (NCBI ptt file)
77131	15	A11	139	2104089	-	0.961	357	NA	NA	201164	386	+	gene	pRL27	TagModule_0155	SO2004		NA	TonB-dependent receptor C-terminal region domain protein (NCBI ptt file)
77132	15	A12	139	2433375	+	0.9127	523	NA	NA	201467	539	+	gene	pRL27	TagModule_0156	SO2323		840	methyl-accepting chemotaxis protein (NCBI ptt file)
77133	15	B01	139	2102139	-	1	149	NA	NA	201163	57	+	gene	pRL27	TagModule_0145	SO2002		NA	hypothetical protein (NCBI ptt file)
77134	15	B02	139	3237900	-	0.9821	166	NA	NA	NA	NA		between	pRL27	TagModule_0146			NA
77135	15	B04	140	18973	+	0.9817	872	NA	NA	203847	199	+	gene	pRL27	TagModule_0136	SOA0022	higB	3549	proteic killer active protein (NCBI ptt file)
77136	15	B05	139	4851876	+	1	624	NA	NA	NA	NA		between	pRL27	TagModule_0149			NA
77137	15	B06	139	3826342	+	1	772	NA	NA	202768	286	+	gene	pRL27	TagModule_0150	SO3673	hmuT	4558	hemin ABC transporter, periplasmic hemin-binding protein (NCBI ptt file)
77138	15	B08	140	26943	-	0.9845	191	0.9845	191	NA	NA		between	pRL27	TagModule_0152			NA
77139	15	B09	139	3453413	-	0.9718	882	NA	NA	202411	960	-	gene	pRL27	TagModule_0153	SO3303		NA	chitinase domain protein (NCBI ptt file)
77140	15	B10	139	2130325	-	0.9987	753	NA	NA	NA	NA		between	pRL27	TagModule_0154			NA
77141	15	B11	139	4463709	+	0.9896	954	NA	NA	NA	NA		between	pRL27	TagModule_0155			NA
77142	15	B12	139	3499840	+	0.9371	469	NA	NA	202465	37	+	gene	pRL27	TagModule_0156	SO3357		NA	conserved hypothetical protein (NCBI ptt file)	YES	YES
77143	15	C01	139	2103727	-	0.991	664	NA	NA	201164	24	+	gene	pRL27	TagModule_0145	SO2004		NA	TonB-dependent receptor C-terminal region domain protein (NCBI ptt file)
77144	15	C02	139	193954	-	0.991	778	NA	NA	199386	1466	+	gene	pRL27	TagModule_0146	SO0189		NA	fibronectin type III domain protein (NCBI ptt file)
77145	15	C03	140	37367	-	1	55	NA	NA	203872	477	-	gene	pRL27	TagModule_0147	SOA0048		1506	prolyl oligopeptidase family protein (NCBI ptt file)
77146	15	C04	139	18893	-	0.9907	640	NA	NA	NA	NA		between	pRL27	TagModule_0136			NA
77147	15	C05	139	1505232	+	0.984	863	NA	NA	200614	295	+	gene	pRL27	TagModule_0149	SO1442		NA	conserved hypothetical protein (NCBI ptt file)
77148	15	C06	139	4130844	+	1	414	NA	NA	NA	NA		between	pRL27	TagModule_0150			NA
77149	15	C07	139	4635322	+	0.9852	734	NA	NA	203520	2552	+	gene	pRL27	TagModule_0151	SO4445		642	response regulator/sensor histidine kinase (NCBI ptt file)
77150	15	C08	139	2173475	-	0.9914	692	NA	NA	201233	258	-	gene	pRL27	TagModule_0152	SO2076		NA	hypothetical protein (NCBI ptt file)		YES
77151	15	C09	139	2245628	-	0.9682	346	NA	NA	201294	485	+	gene	pRL27	TagModule_0153	SO2137		2095	conserved hypothetical protein TIGR00427 (NCBI ptt file)
77152	15	C10	139	4472578	+	0.9918	486	1	70	NA	NA		between	pRL27	TagModule_0154			NA
77153	15	C11	139	1862754	-	0.9837	794	NA	NA	200942	1143	-	gene	pRL27	TagModule_0155	SO1779	omcA	NA	decaheme cytochrome c (NCBI ptt file)	YES	YES
77154	15	C12	139	4082560	+	0.9805	152	NA	NA	203021	49	-	gene	pRL27	TagModule_0156	SO3936	motX	NA	sodium-type flagellar protein MotX (NCBI ptt file)
77155	15	D01	139	797724	+	0.9915	588	NA	NA	199969	1685	-	gene	pRL27	TagModule_0145	SO0783		3972	hypothetical protein (NCBI ptt file)
77156	15	D02	139	3676421	+	0.94	550	0.9054	317	NA	NA		between	pRL27	TagModule_0146			NA
77157	15	D03	139	1167473	+	0.9969	634	NA	NA	NA	NA		between	pRL27	TagModule_0147			NA
77158	15	D04	139	4765667	+	0.9953	841	NA	NA	203641	652	-	gene	pRL27	TagModule_0136	SO4571		583	transcriptional regulator, LysR family (NCBI ptt file)
77159	15	D05	140	69417	-	0.9643	224	0.9643	224	NA	NA		between	pRL27	TagModule_0149			NA
77160	15	D06	139	3483612	-	1	639	NA	NA	202444	146	+	gene	pRL27	TagModule_0150	SO3336		NA	hypothetical protein (NCBI ptt file)		YES
77161	15	D07	140	102198	+	0.9822	675	0.9822	675	NA	NA		between	pRL27	TagModule_0151			NA
77162	15	D08	139	2224366	+	0.9593	242	NA	NA	201276	1035	+	gene	pRL27	TagModule_0152	SO2119		2208	response regulator (NCBI ptt file)
77163	15	D09	140	122431	+	1	249	NA	NA	NA	NA		between	pRL27	TagModule_0153			NA
77164	15	D10	139	365966	-	0.9255	504	NA	NA	199552	172	+	gene	pRL27	TagModule_0154	SO0357		2015	metallo-beta-lactamase superfamily protein (NCBI ptt file)
77165	15	E01	139	4131586	-	0.9971	697	NA	NA	203077	706	-	gene	pRL27	TagModule_0145	SO3993		NA	hypothetical protein (NCBI ptt file)
77166	15	E02	139	1606037	-	0.9867	821	NA	NA	200700	755	+	gene	pRL27	TagModule_0146	SO1530	pomB	1360	sodium-driven polar flagellar protein PomB (NCBI ptt file)
77167	15	E03	139	3311634	-	0.9846	959	NA	NA	202284	715	-	gene	pRL27	TagModule_0147	SO3174		438	glycosyl transferase, group 1 family protein (NCBI ptt file)
77168	15	E04	140	81724	-	0.9543	633	0.9528	633	NA	NA		between	pRL27	TagModule_0136			NA
77169	15	E05	139	1017002	+	0.9747	974	NA	NA	200172	4145	-	gene	pRL27	TagModule_0149	SO0988		3383	formate dehydrogenase, alpha subunit (NCBI ptt file)
77170	15	E06	139	3783206	+	0.991	444	NA	NA	202719	2	-	gene	pRL27	TagModule_0150	SO3622		NA	conserved domain protein (NCBI ptt file)
77171	15	E07	139	4557622	-	0.9947	758	NA	NA	203440	61	-	gene	pRL27	TagModule_0151	SO4362		3381	conserved hypothetical protein (NCBI ptt file)
77172	15	E08	139	291800	-	0.9932	147	NA	NA	199480	233	+	gene	pRL27	TagModule_0152	SO0285		4796	type IV pilus biogenesis protein PilQ (NCBI ptt file)
77173	15	E09	139	2055356	+	0.9965	575	NA	NA	201110	3340	+	gene	pRL27	TagModule_0153	SO1949		NA	invasin domain protein (NCBI ptt file)
77174	15	E10	139	3010065	+	0.915	153	NA	NA	202012	1584	+	gene	pRL27	TagModule_0154	SO2886	nhaB	3067	Na+/H+ antiporter (NCBI ptt file)
77175	15	E11	140	45053	-	0.9928	689	0.9928	689	NA	NA		between	pRL27	TagModule_0155			NA
77176	15	E12	139	244550	+	0.9849	787	NA	NA	199424	493	+	gene	pRL27	TagModule_0168	SO0229	tufA	50	translation elongation factor Tu (NCBI ptt file)
77177	15	F01	139	118088	+	0.9904	724	NA	NA	199304	303	+	gene	pRL27	TagModule_0145	SO0107	fdhD	1526	formate dehydrogenase accessory protein FdhD (NCBI ptt file)
77178	15	F02	139	4591004	-	0.937	706	NA	NA	203474	421	-	gene	pRL27	TagModule_0146	SO4397		NA	hypothetical acetyltransferase (NCBI ptt file)
77179	15	F03	139	4467751	+	1	122	NA	NA	203367	433	-	gene	pRL27	TagModule_0147	SO4288		3932	exopolysaccharide synthesis protein, putative (NCBI ptt file)
77180	15	F04	139	3011438	-	0.9219	446	NA	NA	202015	117	+	gene	pRL27	TagModule_0136	SO2889		642	sensory box histidine kinase (NCBI ptt file)	YES
77181	15	F05	139	3927316	-	1	701	NA	NA	NA	NA		between	pRL27	TagModule_0149			NA
77182	15	F06	139	3291931	+	0.9484	498	NA	NA	202265	73	+	gene	pRL27	TagModule_0150	SO3155		1752	conserved hypothetical protein (NCBI ptt file)
77183	15	F07	139	3287723	+	0.9851	731	NA	NA	NA	NA		between	pRL27	TagModule_0151			NA
77184	15	F08	139	401385	-	0.9614	285	NA	NA	199580	335	-	gene	pRL27	TagModule_0152	SO0387		NA	hypothetical protein (NCBI ptt file)	YES
77185	15	F09	139	3409609	-	0.9888	801	NA	NA	202378	269	-	gene	pRL27	TagModule_0153	SO3270		399	polysaccharide biosynthesis protein (NCBI ptt file)	YES	YES
77186	15	F10	139	1477148	-	0.9672	669	NA	NA	200594	79	+	gene	pRL27	TagModule_0154	SO1419		3976	hypothetical protein (NCBI ptt file)
77187	15	F11	139	1586404	+	0.9804	459	0.9595	515	NA	NA		between	pRL27	TagModule_0155			NA
77188	15	G01	139	3214451	-	0.9925	662	NA	NA	202207	52	+	gene	pRL27	TagModule_0145	SO3090		714	MoxR domain protein (NCBI ptt file)
77189	15	G02	139	2565830	+	1	535	NA	NA	201594	860	+	gene	pRL27	TagModule_0146	SO2450	susB	NA	alpha-glucosidase (NCBI ptt file)	YES
77190	15	G03	139	1817007	-	1	294	NA	NA	200897	326	-	gene	pRL27	TagModule_0147	SO1733		NA	hypothetical protein (NCBI ptt file)	YES	YES
77191	15	G04	139	450476	-	0.9408	454	NA	NA	199620	942	+	gene	pRL27	TagModule_0136	SO0428		1752	conserved hypothetical protein (NCBI ptt file)
77192	15	G05	139	4111771	+	0.9699	465	NA	NA	203058	42	+	gene	pRL27	TagModule_0149	SO3974		NA	conserved domain protein (NCBI ptt file)	YES	YES
77193	15	G06	140	35271	+	0.9836	671	NA	NA	NA	NA		between	pRL27	TagModule_0150			NA
77194	15	G07	140	37585	+	0.9895	664	NA	NA	203872	259	-	gene	pRL27	TagModule_0151	SOA0048		1506	prolyl oligopeptidase family protein (NCBI ptt file)
77195	15	G08	139	4616400	+	0.9936	156	NA	NA	203501	600	+	gene	pRL27	TagModule_0152	SO4425		2199	GGDEF family protein (NCBI ptt file)
77196	15	G09	139	3951485	+	0.9923	908	NA	NA	NA	NA		between	pRL27	TagModule_0153			NA
77197	15	G10	139	2023707	-	1	480	NA	NA	201084	834	-	gene	pRL27	TagModule_0154	SO1923		841	AcrB/AcrD/AcrF family protein (NCBI ptt file)
77198	15	G11	139	3503468	-	0.9799	597	NA	NA	NA	NA		between	pRL27	TagModule_0155			NA
77199	15	G12	140	43228	+	0.9851	735	NA	NA	NA	NA		between	pRL27	TagModule_0168			NA
77200	15	H01	139	1007134	-	0.9885	520	NA	NA	200160	422	-	gene	pRL27	TagModule_0145	SO0976	ohr	1764	organic hydroperoxide resistance protein (NCBI ptt file)
77201	15	H02	139	4745347	+	0.9984	633	NA	NA	203619	312	+	gene	pRL27	TagModule_0146	SO4548		3547	transposase, IS110 family (NCBI ptt file)		YES
77202	15	H03	139	23951	-	0.9931	145	NA	NA	199217	519	-	gene	pRL27	TagModule_0147	SO0020	fadA	183	fatty oxidation complex, beta subunit (NCBI ptt file)
77203	15	H04	139	511305	-	1	597	NA	NA	199678	673	+	gene	pRL27	TagModule_0136	SO0487	nosF	1131	copper ABC transporter, ATP-binding protein (NCBI ptt file)
77204	15	H05	139	2283275	+	1	344	NA	NA	NA	NA		between	pRL27	TagModule_0149			NA
77205	15	H06	139	1584216	-	0.9547	265	NA	NA	370292	334	+	gene	pRL27	TagModule_0150	SO1508.1		NA	hypothetical protein (NCBI ptt file)
77206	15	H07	139	4624735	-	0.9718	530	NA	NA	203511	409	+	gene	pRL27	TagModule_0151	SO4436		NA	ISSod11, transposase (NCBI ptt file)		YES
77207	15	H08	139	4021738	+	0.9863	363	NA	NA	202960	519	+	gene	pRL27	TagModule_0152	SO3874		583	transcriptional regulator, LysR family (NCBI ptt file)
77208	15	H09	140	20656	-	0.9816	325	NA	NA	203850	26	-	gene	pRL27	TagModule_0153	SO_A0025		2801	ISSod1, transposase OrfA (NCBI)
77209	15	H10	140	141611	+	0.9959	244	NA	NA	203957	2014	-	gene	pRL27	TagModule_0154	SOA0153		3696	heavy metal efflux pump, CzcA family (NCBI ptt file)
77210	15	H11	139	4278638	-	0.9893	652	NA	NA	NA	NA		between	pRL27	TagModule_0155			NA
77892	16	A01	139	1497839	-	0.9936	470	NA	NA	NA	NA		between	pRL27	TagModule_0157			NA
77893	16	A02	140	108463	-	1	434	1	430	NA	NA		between	pRL27	TagModule_0158			NA
77894	16	A03	139	4656326	-	0.9587	506	NA	NA	NA	NA		between	pRL27	TagModule_0159			NA
77895	16	A04	139	2249257	+	0.9508	425	NA	NA	NA	NA		between	pRL27	TagModule_0148			NA
77896	16	A05	139	276920	+	1	665	NA	NA	199468	260	-	gene	pRL27	TagModule_0161	SO0273		NA	conserved hypothetical protein (NCBI ptt file)		YES
77897	16	A06	139	3448074	+	0.9599	374	NA	NA	202410	3847	-	gene	pRL27	TagModule_0162	SO3302		NA	serine protease, subtilase family (NCBI ptt file)
77898	16	A08	139	1733811	+	0.9586	621	NA	NA	200812	1439	+	gene	pRL27	TagModule_0164	SO1647		475	glutathione-regulated potassium-efflux system protein KefB, putative (NCBI ptt file)
77899	16	A09	139	3828657	-	1	579	NA	NA	202770	554	+	gene	pRL27	TagModule_0165	SO3675	hmuV	4559	hemin ABC transporter, ATP-binding protein (NCBI ptt file)	YES	YES
77900	16	A10	139	4546927	-	0.996	252	NA	NA	203432	33	-	gene	pRL27	TagModule_0166	SO4354		727	hypothetical Fe-S-cluster oxidoreductase (NCBI ptt file)
77901	16	A11	139	449118	+	0.9712	986	NA	NA	199619	4290	+	gene	pRL27	TagModule_0167	SO0427		5001	sensory box protein (NCBI ptt file)
77902	16	A12	139	1398970	+	0.9931	437	NA	NA	200516	36	-	gene	pRL27	TagModule_0168	SO1341	nadB	29	L-aspartate oxidase (NCBI ptt file)
77903	16	B01	139	2513135	+	1	62	NA	NA	201552	510	+	gene	pRL27	TagModule_0157	SO2408		1180	radical activating enzyme (NCBI ptt file)
77904	16	B02	139	1505482	+	0.9821	504	NA	NA	200614	545	+	gene	pRL27	TagModule_0158	SO1442		NA	conserved hypothetical protein (NCBI ptt file)
77905	16	B03	139	4106514	+	0.9722	716	NA	NA	203050	864	+	gene	pRL27	TagModule_0159	SO3966	mgtE-2	2239	magnesium transporter (NCBI ptt file)
77906	16	B04	139	4580226	-	1	169	NA	NA	NA	NA		between	pRL27	TagModule_0148			NA
77907	16	B05	139	3394814	+	0.9962	522	NA	NA	202366	902	+	gene	pRL27	TagModule_0161	SO3258		NA	conserved hypothetical protein (NCBI ptt file)
77908	16	B06	139	664798	-	0.994	495	NA	NA	199827	2919	-	gene	pRL27	TagModule_0162	SO0639		NA	Collagenase family (NCBI ptt file)
77909	16	B07	139	3664877	-	0.9901	404	NA	NA	202613	562	-	gene	pRL27	TagModule_0163	SO3512		NA	conserved hypothetical protein (NCBI ptt file)
77910	16	B08	139	2231885	+	1	317	NA	NA	201283	409	+	gene	pRL27	TagModule_0164	SO2126	cheB-1	2201	protein-glutamate methylesterase CheB (NCBI ptt file)
77911	16	B09	139	2114000	+	0.9749	512	NA	NA	201175	449	+	gene	pRL27	TagModule_0165	SO2015	recR	353	recombination protein RecR (NCBI ptt file)
77912	16	B10	139	4463141	-	0.9615	308	NA	NA	203362	542	+	gene	pRL27	TagModule_0166	SO4283		1477	apbE family protein (NCBI ptt file)
77913	16	B11	139	303184	+	0.9908	325	NA	NA	199492	426	-	gene	pRL27	TagModule_0167	SO0297		2823	lipoprotein, putative (NCBI ptt file)		YES
77914	16	B12	139	725256	-	0.9821	168	NA	NA	199895	412	-	gene	pRL27	TagModule_0168	SO0707		NA	hypothetical protein (NCBI ptt file)
77915	16	C01	140	36325	-	0.9808	723	NA	NA	203872	1519	-	gene	pRL27	TagModule_0157	SOA0048		1506	prolyl oligopeptidase family protein (NCBI ptt file)
77916	16	C02	139	1061643	-	0.9939	816	NA	NA	NA	NA		between	pRL27	TagModule_0158			NA
77917	16	C03	139	2102303	-	0.9953	426	NA	NA	201163	221	+	gene	pRL27	TagModule_0159	SO2002		NA	hypothetical protein (NCBI ptt file)
77918	16	C04	139	2192342	-	1	623	NA	NA	201252	1572	-	gene	pRL27	TagModule_0148	SO2095		NA	hypothetical protein (NCBI ptt file)
77919	16	C05	140	31474	+	1	242	NA	NA	NA	NA		between	pRL27	TagModule_0161			NA
77920	16	C06	139	4786111	+	0.9894	842	NA	NA	NA	NA		between	pRL27	TagModule_0162			NA
77921	16	C07	140	52768	-	0.9836	605	0.9836	605	NA	NA		between	pRL27	TagModule_0163			NA
77922	16	C08	140	152048	-	0.9806	668	NA	NA	NA	NA		between	pRL27	TagModule_0164			NA
77923	16	C09	139	2700114	+	0.9881	499	NA	NA	201710	863	-	gene	pRL27	TagModule_0165	SO2570		4805	lipoprotein, putative (NCBI ptt file)
77924	16	C10	139	1270413	+	0.9826	512	NA	NA	200401	729	+	gene	pRL27	TagModule_0166	SO1223	serB	560	phosphoserine phosphatase (NCBI ptt file)	YES	YES
77925	16	C11	140	69306	-	0.9434	157	0.9434	157	NA	NA		between	pRL27	TagModule_0167			NA
77926	16	C12	139	1445886	+	0.9917	836	NA	NA	200563	486	-	gene	pRL27	TagModule_0168	SO1388		6	aminopeptidase P, putative (NCBI ptt file)
77927	16	D01	140	117337	-	1	257	NA	NA	NA	NA		between	pRL27	TagModule_0157			NA
77928	16	D02	140	37608	+	0.9988	801	NA	NA	203872	236	-	gene	pRL27	TagModule_0158	SOA0048		1506	prolyl oligopeptidase family protein (NCBI ptt file)
77929	16	D03	139	2935006	-	0.9942	517	NA	NA	201943	226	-	gene	pRL27	TagModule_0159	SO2813		1028	oxidoreductase, short chain dehydrogenase/reductase family (NCBI ptt file)
77930	16	D04	139	2239286	-	0.9643	558	NA	NA	201290	152	+	gene	pRL27	TagModule_0148	SO2133		NA	hypothetical protein (NCBI ptt file)
77931	16	D05	139	2076180	-	0.963	700	NA	NA	201132	788	+	gene	pRL27	TagModule_0161	SO1971		318	AMP-binding family protein (NCBI ptt file)
77932	16	D06	139	4529937	-	0.9841	690	NA	NA	203417	320	+	gene	pRL27	TagModule_0162	SO4339		733	sodium-dependent transporter, putative (NCBI ptt file)	YES	YES
77933	16	D07	139	3751658	+	1	373	NA	NA	NA	NA		between	pRL27	TagModule_0163			NA
77934	16	D08	140	37130	+	0.9969	326	NA	NA	203872	714	-	gene	pRL27	TagModule_0164	SOA0048		1506	prolyl oligopeptidase family protein (NCBI ptt file)
77935	16	D09	139	1478490	+	0.9789	795	NA	NA	200595	51	+	gene	pRL27	TagModule_0165	SO1420		3203	outer membrane porin, putative (NCBI ptt file)
77936	16	D10	139	4210908	-	0.9872	234	NA	NA	203139	321	-	gene	pRL27	TagModule_0166	SO4055	metL	527	aspartokinase II/homoserine dehydrogenase, methionine-sensitive (NCBI ptt file)
77937	16	D11	139	4107916	+	0.9821	722	NA	NA	NA	NA		between	pRL27	TagModule_0167			NA
77938	16	D12	139	3067935	+	0.9763	624	NA	NA	202057	1028	-	gene	pRL27	TagModule_0168	SO2933		616	sohB protein, peptidase U7 family (NCBI ptt file)
77939	16	E01	139	677606	-	1	366	NA	NA	199841	508	+	gene	pRL27	TagModule_0157	SO0653		NA	hypothetical protein (NCBI ptt file)		YES
77940	16	E03	140	44635	-	0.9979	484	NA	NA	NA	NA		between	pRL27	TagModule_0159			NA
77941	16	E04	139	1473286	-	0.9346	260	NA	NA	200591	516	-	gene	pRL27	TagModule_0148	SO1416		4566	DNA-binding response regulator (NCBI ptt file)	YES	YES
77942	16	E05	139	582840	-	0.9703	670	NA	NA	370297	1092	-	gene	pRL27	TagModule_0161	SO0560.2		NA	hypothetical small-conductance mechanosensitive channel (NCBI ptt file)
77943	16	E06	139	1534991	-	1	436	NA	NA	NA	NA		between	pRL27	TagModule_0162			NA
77944	16	E07	140	113339	+	0.9721	533	NA	NA	NA	NA		between	pRL27	TagModule_0163			NA
77945	16	E08	139	2113872	+	0.9886	614	NA	NA	201175	321	+	gene	pRL27	TagModule_0164	SO2015	recR	353	recombination protein RecR (NCBI ptt file)	YES	YES
77946	16	E09	139	4463149	+	1	420	NA	NA	203362	550	+	gene	pRL27	TagModule_0165	SO4283		1477	apbE family protein (NCBI ptt file)
77947	16	E10	139	4509619	-	0.9896	765	NA	NA	203401	437	+	gene	pRL27	TagModule_0166	SO4322		3672	conserved hypothetical protein (NCBI ptt file)
77948	16	E11	139	571563	+	0.9974	769	NA	NA	199740	528	-	gene	pRL27	TagModule_0167	SO0549		NA	chemotaxis protein CheY/response regulator receiver domain protein (NCBI ptt file)	YES
77949	16	E12	139	397134	+	0.9071	312	NA	NA	199575	168	-	gene	pRL27	TagModule_0168	SO0382	hsdS-1	732	type I restriction-modification system, S subunit (NCBI ptt file)
77950	16	F01	139	4035949	+	0.9788	941	NA	NA	202975	1226	-	gene	pRL27	TagModule_0157	SO3890		840	methyl-accepting chemotaxis protein (NCBI ptt file)
77951	16	F02	140	46214	-	1	201	NA	NA	203878	803	+	overlap	pRL27	TagModule_0158	SOA0054		2801	ISSod1, transposase OrfB (NCBI ptt file)
77952	16	F03	139	3632485	+	0.975	869	NA	NA	202587	1452	+	gene	pRL27	TagModule_0159	SO3484		841	AcrB/AcrD/AcrF family protein (NCBI ptt file)
77953	16	F04	139	2681861	-	0.9846	514	NA	NA	NA	NA		between	pRL27	TagModule_0148			NA
77954	16	F05	139	4716414	+	0.9692	712	NA	NA	203596	288	+	gene	pRL27	TagModule_0161	SO4522		NA	conserved hypothetical protein (NCBI ptt file)
77955	16	F06	139	4472070	-	0.9902	406	NA	NA	NA	NA		between	pRL27	TagModule_0162			NA
77956	16	F07	139	2488465	+	0.981	683	NA	NA	201529	1114	+	gene	pRL27	TagModule_0163	SO2385		3211	conserved hypothetical protein (NCBI ptt file)	YES	YES
77957	16	F08	140	124619	+	0.9799	740	NA	NA	NA	NA		between	pRL27	TagModule_0164			NA
77958	16	F09	139	2101505	-	1	288	NA	NA	201162	1516	+	gene	pRL27	TagModule_0165	SO2001	ushA	737	5'-nucleotidase (NCBI ptt file)
77959	16	F10	139	4505009	-	0.9434	649	NA	NA	203397	1445	+	gene	pRL27	TagModule_0166	SO4318	rtxB	2274	toxin secretion ATP-binding protein (NCBI ptt file)
77960	16	F11	139	938978	+	0.9939	493	NA	NA	200096	314	+	gene	pRL27	TagModule_0167	SO0912		NA	hypothetical protein (NCBI ptt file)
77961	16	F12	140	83427	-	0.9906	425	0.9859	425	NA	NA		between	pRL27	TagModule_0168			NA
77962	16	G01	139	4509379	+	0.9977	862	NA	NA	203401	197	+	gene	pRL27	TagModule_0157	SO4322		3672	conserved hypothetical protein (NCBI ptt file)	YES
77963	16	G02	139	798137	-	0.9614	384	NA	NA	199969	1272	-	gene	pRL27	TagModule_0158	SO0783		3972	hypothetical protein (NCBI ptt file)	YES	YES
77964	16	G03	139	2173649	-	0.9877	885	NA	NA	201233	84	-	gene	pRL27	TagModule_0159	SO2076		NA	hypothetical protein (NCBI ptt file)
77965	16	G05	139	768940	+	0.9943	520	NA	NA	199938	175	+	gene	pRL27	TagModule_0161	SO0752		NA	hypothetical protein (NCBI ptt file)	YES
77966	16	G06	140	62696	+	0.9881	504	NA	NA	NA	NA		between	pRL27	TagModule_0162			NA
77967	16	G07	139	4463149	+	1	423	NA	NA	203362	550	+	gene	pRL27	TagModule_0163	SO4283		1477	apbE family protein (NCBI ptt file)
77968	16	G08	139	976488	+	0.9973	735	NA	NA	200128	659	-	gene	pRL27	TagModule_0164	SO0944		NA	conserved hypothetical protein (NCBI ptt file)
77969	16	G09	139	4271392	+	0.9313	734	NA	NA	203196	1104	-	gene	pRL27	TagModule_0165	SO4112	mshL	1450	MSHA biogenesis protein MshL (NCBI ptt file)
77970	16	G10	139	2223715	+	0.9907	752	NA	NA	201276	384	+	gene	pRL27	TagModule_0166	SO2119		2208	response regulator (NCBI ptt file)
77971	16	G11	140	126032	+	0.9791	989	NA	NA	203944	814	+	gene	pRL27	TagModule_0167	SO_A0139		NA	hypothetical protein (NCBI)
77972	16	G12	139	4532975	-	0.9698	846	NA	NA	203419	357	+	gene	pRL27	TagModule_0168	SO4341		NA	hypothetical protein (NCBI ptt file)
77973	16	H02	140	21947	-	0.906	141	0.906	141	NA	NA		between	pRL27	TagModule_0158			NA
77974	16	H03	139	1650580	-	0.9698	232	NA	NA	200738	210	-	gene	pRL27	TagModule_0159	SO1571		NA	hypothetical protein (NCBI ptt file)
77975	16	H05	139	4224035	-	0.9731	668	NA	NA	NA	NA		between	pRL27	TagModule_0161			NA
77976	16	H06	140	138267	-	0.9916	356	0.9916	356	NA	NA		between	pRL27	TagModule_0162			NA
77977	16	H07	140	26813	-	0.9908	324	0.9877	324	NA	NA		between	pRL27	TagModule_0163			NA
77978	16	H08	139	1292034	-	1	116	0.9569	116	NA	NA		between	pRL27	TagModule_0164			NA
77979	16	H09	139	4842719	-	0.9406	303	NA	NA	203716	144	+	gene	pRL27	TagModule_0165	SO4646		NA	hypothetical protein (NCBI ptt file)
77980	16	H10	139	576545	-	1	341	NA	NA	NA	NA		between	pRL27	TagModule_0166			NA
77981	16	H11	139	2851374	+	0.9705	271	NA	NA	201873	188	+	gene	pRL27	TagModule_0167	SO2735		NA	hypothetical protein (NCBI ptt file)
77982	16	H12	139	554112	-	1	271	NA	NA	199723	205	+	gene	pRL27	TagModule_0168	SO0532	arsR	640	arsenical resistence operon repressor (NCBI ptt file)	YES	YES
77983	17	A02	139	2000653	+	0.984	803	NA	NA	NA	NA		between	pRL27	TagModule_0170			NA
77984	17	A03	139	867088	-	0.9834	299	NA	NA	200031	157	-	gene	pRL27	TagModule_0171	SO0845	napB	3043	cytochrome c-type protein NapB (NCBI ptt file)	YES	YES
77985	17	A04	139	1192011	-	0.9775	917	NA	NA	200328	603	+	gene	pRL27	TagModule_0160	SO1148		NA	hypothetical protein (NCBI ptt file)
77986	17	A06	139	4132885	-	1	421	NA	NA	203078	408	-	gene	pRL27	TagModule_0174	SO3994		NA	hypothetical protein (NCBI ptt file)	YES	YES
77987	17	A07	139	3443217	+	0.9102	245	NA	NA	202406	399	-	gene	pRL27	TagModule_0175	SO3298		NA	conserved hypothetical protein (NCBI ptt file)
77988	17	A09	139	4018576	-	1	248	NA	NA	202958	520	+	gene	pRL27	TagModule_0177	SO3872		NA	arylsulfate sulfotransferase (NCBI ptt file)
77989	17	A10	139	4532320	+	1	585	0.9342	150	NA	NA		between	pRL27	TagModule_0178			NA
77990	17	A12	139	3330627	+	0.969	548	NA	NA	NA	NA		between	pRL27	TagModule_0180			NA
77991	17	B01	139	3287894	-	0.9978	453	NA	NA	202260	125	+	gene	pRL27	TagModule_0169	SO3150		NA	lipoprotein, putative (NCBI ptt file)
77992	17	B02	139	4555195	-	0.9862	721	NA	NA	203437	398	-	gene	pRL27	TagModule_0170	SO4359		NA	outer membrane protein, putative (NCBI ptt file)
77993	17	B03	140	131939	-	0.9857	830	NA	NA	NA	NA		between	pRL27	TagModule_0171			NA
77994	17	B04	139	3454908	+	0.9912	793	NA	NA	202413	283	-	gene	pRL27	TagModule_0160	SO3305		2197	DNA-binding response regulator, LuxR family (NCBI ptt file)
77995	17	B05	139	1119944	-	1	663	NA	NA	200260	168	-	gene	pRL27	TagModule_0173	SO1078		NA	hypothetical protein (NCBI ptt file)
77996	17	B06	139	3444477	-	0.9922	514	NA	NA	202407	931	-	gene	pRL27	TagModule_0174	SO3299		2986	Pal/histidase family protein (NCBI ptt file)
77997	17	B07	139	4220983	+	0.9919	611	NA	NA	NA	NA		between	pRL27	TagModule_0175			NA
77998	17	B08	139	2223866	-	0.9375	128	NA	NA	201276	535	+	gene	pRL27	TagModule_0176	SO2119		2208	response regulator (NCBI ptt file)
77999	17	B09	140	45000	-	0.9834	360	0.9834	360	NA	NA		between	pRL27	TagModule_0177			NA
78000	17	B10	139	4441077	+	0.9923	521	NA	NA	203345	36	-	gene	pRL27	TagModule_0178	SO4264	hsdS-2	732	type I restriction-modification system, S subunit (NCBI ptt file)
78001	17	B11	140	21130	-	0.9853	608	0.9853	608	NA	NA		between	pRL27	TagModule_0179			NA
78002	17	B12	139	798137	-	1	99	NA	NA	199969	1272	-	gene	pRL27	TagModule_0180	SO0783		3972	hypothetical protein (NCBI ptt file)
78003	17	C01	139	674195	+	0.9635	712	NA	NA	199834	180	+	gene	pRL27	TagModule_0169	SO0646		NA	hypothetical protein (NCBI ptt file)	YES	YES
78004	17	C02	139	2814723	-	0.9833	595	NA	NA	201835	483	+	gene	pRL27	TagModule_0170	SO2697		3941	conserved hypothetical protein (NCBI ptt file)	YES
78005	17	C03	139	4587570	-	1	403	NA	NA	NA	NA		between	pRL27	TagModule_0171			NA
78006	17	C04	139	1383751	-	0.9843	381	NA	NA	200501	369	+	gene	pRL27	TagModule_0160	SO1326		1242	conserved hypothetical protein (NCBI ptt file)
78007	17	C05	139	3374909	-	1	663	NA	NA	202344	313	-	gene	pRL27	TagModule_0173	SO3235	fliD	1345	flagellar hook-associated protein FliD (NCBI ptt file)	YES
78008	17	C06	140	20502	-	0.9537	475	NA	NA	203850	180	-	gene	pRL27	TagModule_0174	SO_A0025		2801	ISSod1, transposase OrfA (NCBI)
78009	17	C07	139	1609419	+	0.9902	610	NA	NA	200704	98	+	gene	pRL27	TagModule_0175	SO1534		3571	conserved hypothetical protein (NCBI ptt file)
78010	17	C08	139	1495547	-	0.9819	823	NA	NA	200607	427	+	gene	pRL27	TagModule_0176	SO1432		NA	hypothetical protein (NCBI ptt file)
78011	17	C09	139	3319130	+	0.9938	805	NA	NA	202290	739	-	gene	pRL27	TagModule_0177	SO3180		463	glycosyl transferase, group 2 family protein (NCBI ptt file)
78012	17	C10	139	3668903	+	0.9712	823	NA	NA	202615	816	-	gene	pRL27	TagModule_0178	SO3514		1629	hypothetical TonB-dependent receptor (NCBI ptt file)
78013	17	C11	139	1087079	-	0.9972	362	NA	NA	200232	334	+	gene	pRL27	TagModule_0179	SO1049		1670	acetyltransferase, GNAT family (NCBI ptt file)	YES
78014	17	C12	139	575223	+	1	125	NA	NA	199746	1291	-	gene	pRL27	TagModule_0180	SO0555		2200	conserved hypothetical protein (NCBI ptt file)	YES	YES
78015	17	D01	140	54727	+	1	697	NA	NA	203890	655	-	gene	pRL27	TagModule_0169	SOA0067		NA	hypothetical protein (NCBI ptt file)
78016	17	D02	139	1567069	-	0.991	664	NA	NA	200667	2306	+	gene	pRL27	TagModule_0170	SO1496		58	glycogen phosphorylase family protein (NCBI ptt file)		YES
78017	17	D03	139	52025	+	0.9788	610	NA	NA	199242	21	+	gene	pRL27	TagModule_0171	SO0045		1959	Rrf2 family protein (NCBI ptt file)
78018	17	D04	139	4549044	-	0.9951	407	NA	NA	203434	1037	-	gene	pRL27	TagModule_0160	SO4356		NA	conserved domain protein (NCBI ptt file)
78019	17	D05	139	1747292	-	0.9948	384	NA	NA	200824	1089	-	gene	pRL27	TagModule_0173	SO1659		NA	decaheme cytochrome c (NCBI ptt file)
78020	17	D06	139	3972884	-	0.9709	751	NA	NA	202911	654	-	gene	pRL27	TagModule_0174	SO3822		NA	conserved hypothetical protein (NCBI ptt file)
78021	17	D07	139	2062622	+	0.9955	883	NA	NA	NA	NA		between	pRL27	TagModule_0175			NA
78022	17	D08	139	167974	-	0.9872	772	NA	NA	NA	NA		between	pRL27	TagModule_0176			NA
78023	17	D09	139	776505	+	0.9765	467	NA	NA	199947	102	-	gene	pRL27	TagModule_0177	SO0761	glnB-1	347	nitrogen regulatory protein P-II 1 (NCBI ptt file)	YES	YES
78024	17	D10	139	2981554	+	0.9827	914	NA	NA	201983	1710	-	gene	pRL27	TagModule_0178	SO2857		4147	sodium/solute symporter family protein (NCBI ptt file)	YES	YES
78025	17	D11	139	4016440	-	0.9395	494	NA	NA	202956	575	-	gene	pRL27	TagModule_0179	SO3870		1495	disulfide bond formation protein (NCBI ptt file)
78026	17	D12	139	418933	+	0.9801	445	NA	NA	199597	730	+	gene	pRL27	TagModule_0180	SO0404		NA	hypothetical protein (NCBI ptt file)
78027	17	E01	139	628208	+	0.9924	786	NA	NA	199789	1358	+	gene	pRL27	TagModule_0169	SO0601	mutL	323	DNA mismatch repair protein MutL (NCBI ptt file)
78028	17	E02	139	743299	+	0.9791	805	NA	NA	199916	438	+	gene	pRL27	TagModule_0170	SO0728		1433	conserved hypothetical protein (NCBI ptt file)
78029	17	E03	139	4635862	-	0.9676	741	NA	NA	203520	3092	+	gene	pRL27	TagModule_0171	SO4445		642	response regulator/sensor histidine kinase (NCBI ptt file)
78030	17	E04	140	32877	-	1	529	NA	NA	203868	381	+	gene	pRL27	TagModule_0160	SOA0044		NA	site-specific recombinase, phage integrase family (NCBI ptt file)
78031	17	E05	140	97368	-	0.9717	597	0.9717	597	NA	NA		between	pRL27	TagModule_0173			NA
78032	17	E06	139	3624432	-	0.9817	162	NA	NA	NA	NA		between	pRL27	TagModule_0174			NA
78033	17	E07	139	4582928	-	0.9916	473	1	129	NA	NA		between	pRL27	TagModule_0175			NA
78034	17	E08	139	3096805	-	0.9891	728	NA	NA	202086	1137	-	gene	pRL27	TagModule_0176	SO2963		NA	prophage LambdaSo, major capsid protein, HK97 family (NCBI ptt file)
78035	17	E09	139	4555392	+	0.9979	473	NA	NA	203437	201	-	gene	pRL27	TagModule_0177	SO4359		NA	outer membrane protein, putative (NCBI ptt file)
78036	17	E10	139	2544084	-	0.9705	441	NA	NA	201578	2252	-	gene	pRL27	TagModule_0178	SO2434		2199	extracellular solute-binding proteins, family 3/GGDEF domain protein (NCBI ptt file)
78037	17	E11	139	4584014	-	1	398	NA	NA	203465	982	+	gene	pRL27	TagModule_0179	SO4387		642	sensor histidine kinase (NCBI ptt file)
78038	17	E12	139	3667380	+	0.9881	581	NA	NA	202615	2339	-	gene	pRL27	TagModule_0180	SO3514		1629	hypothetical TonB-dependent receptor (NCBI ptt file)
78039	17	F01	139	4547820	-	0.9894	934	NA	NA	203433	549	+	gene	pRL27	TagModule_0169	SO4355		664	hypothetical protein (NCBI ptt file)
78040	17	F02	139	4018891	-	0.9588	437	NA	NA	202958	835	+	gene	pRL27	TagModule_0170	SO3872		NA	arylsulfate sulfotransferase (NCBI ptt file)
78041	17	F03	139	52385	+	0.9783	598	NA	NA	199242	381	+	gene	pRL27	TagModule_0171	SO0045		1959	Rrf2 family protein (NCBI ptt file)
78042	17	F04	139	68646	-	0.9619	701	NA	NA	199258	239	+	gene	pRL27	TagModule_0160	SO0061		791	lipoprotein, NLP/P60 family (NCBI ptt file)
78043	17	F05	139	1432364	-	0.9749	754	NA	NA	200550	298	-	gene	pRL27	TagModule_0173	SO1375		2317	carboxypeptidase (NCBI ptt file)		YES
78044	17	F06	139	4463149	+	1	420	NA	NA	203362	550	+	gene	pRL27	TagModule_0174	SO4283		1477	apbE family protein (NCBI ptt file)
78045	17	F07	139	797576	-	0.9694	589	NA	NA	199969	1833	-	gene	pRL27	TagModule_0175	SO0783		3972	hypothetical protein (NCBI ptt file)
78046	17	F08	139	4765556	-	0.9851	333	NA	NA	203641	763	-	gene	pRL27	TagModule_0176	SO4571		583	transcriptional regulator, LysR family (NCBI ptt file)
78047	17	F09	139	3445146	-	0.9318	308	NA	NA	202407	262	-	gene	pRL27	TagModule_0177	SO3299		2986	Pal/histidase family protein (NCBI ptt file)
78048	17	F10	139	4553493	-	0.982	611	NA	NA	203436	111	-	gene	pRL27	TagModule_0178	SO4358	dmaA-2	243	anaerobic dimethyl sulfoxide reductase, A subunit (NCBI ptt file)
78049	17	F11	140	21130	-	0.941	351	0.941	351	NA	NA		between	pRL27	TagModule_0179			NA
78050	17	F12	139	3789515	+	1	267	NA	NA	202727	779	-	gene	pRL27	TagModule_0180	SO3631	hprA	1052	glycerate dehydrogenase (NCBI ptt file)
78051	17	G01	139	102161	-	1	397	NA	NA	199290	33	-	gene	pRL27	TagModule_0169	SO0093		1972	NupC family protein (NCBI ptt file)
78052	17	G02	139	3667106	-	0.9798	244	NA	NA	202615	2613	-	gene	pRL27	TagModule_0170	SO3514		1629	hypothetical TonB-dependent receptor (NCBI ptt file)
78053	17	G03	140	36893	+	0.9769	429	NA	NA	203872	951	-	gene	pRL27	TagModule_0171	SOA0048		1506	prolyl oligopeptidase family protein (NCBI ptt file)
78054	17	G04	139	4553559	+	0.9441	462	NA	NA	203436	45	-	gene	pRL27	TagModule_0160	SO4358	dmaA-2	243	anaerobic dimethyl sulfoxide reductase, A subunit (NCBI ptt file)
78055	17	G06	139	4704797	-	0.9893	558	NA	NA	203585	798	+	gene	pRL27	TagModule_0174	SO4511		2864	formate dehydrogenase, C subunit, putative (NCBI ptt file)
78056	17	G07	140	125592	+	0.9837	910	NA	NA	203944	374	+	gene	pRL27	TagModule_0175	SO_A0139		NA	hypothetical protein (NCBI)
78057	17	G08	139	3786920	+	0.9864	871	NA	NA	202724	258	+	gene	pRL27	TagModule_0176	SO3627		1309	transcriptional regulator, TetR family (NCBI ptt file)
78058	17	G09	139	4624116	-	0.9851	605	NA	NA	NA	NA		between	pRL27	TagModule_0177			NA
78059	17	G10	139	844886	+	1	392	NA	NA	200013	920	-	gene	pRL27	TagModule_0178	SO0827	lldP	1620	L-lactate permease (NCBI ptt file)
78060	17	G11	139	352516	-	0.9361	528	NA	NA	NA	NA		between	pRL27	TagModule_0179			NA
78061	17	G12	139	1506893	+	0.9955	220	NA	NA	200615	141	+	gene	pRL27	TagModule_0180	SO1443		NA	conserved hypothetical protein (NCBI ptt file)
78062	17	H02	139	2085884	-	0.9786	557	NA	NA	201142	352	+	gene	pRL27	TagModule_0170	SO1981		1488	conserved hypothetical protein (NCBI ptt file)
78063	17	H03	139	1619194	-	0.9643	303	NA	NA	200711	561	-	gene	pRL27	TagModule_0171	SO1543		NA	hypothetical protein (NCBI ptt file)
78064	17	H04	139	2052122	-	0.9929	700	NA	NA	201110	106	+	gene	pRL27	TagModule_0160	SO1949		NA	invasin domain protein (NCBI ptt file)
78065	17	H05	139	4554272	-	0.9984	626	NA	NA	203437	1321	-	gene	pRL27	TagModule_0173	SO4359		NA	outer membrane protein, putative (NCBI ptt file)
78066	17	H06	139	165521	+	0.9879	656	NA	NA	NA	NA		between	pRL27	TagModule_0174			NA
78067	17	H07	139	3932764	+	0.9945	542	NA	NA	202871	249	-	gene	pRL27	TagModule_0175	SO3780	cydD	4988	ABC transporter, ATP-binding protein CydD (NCBI ptt file)
78068	17	H08	139	2074155	+	0.9699	692	NA	NA	201130	431	-	gene	pRL27	TagModule_0176	SO1969		2947	conserved hypothetical protein (NCBI ptt file)
78069	17	H09	139	750755	+	0.9689	905	NA	NA	199924	516	-	gene	pRL27	TagModule_0177	SO0736		NA	conserved hypothetical protein (NCBI ptt file)
78070	17	H10	139	144825	+	0.9497	533	NA	NA	199335	582	-	gene	pRL27	TagModule_0178	SO0138	moeA	303	molybdopterin biosynthesis MoeA protein (NCBI ptt file)
78071	17	H11	140	59972	-	0.9289	239	NA	NA	203898	185	-	gene	pRL27	TagModule_0179	SOA0076		NA	conserved domain protein (NCBI ptt file)		YES
78072	18	A01	139	2223529	-	0.9489	274	NA	NA	201276	198	+	gene	pRL27	TagModule_0181	SO2119		2208	response regulator (NCBI ptt file)
78073	18	A02	139	525097	+	0.9034	145	NA	NA	NA	NA		between	pRL27	TagModule_0182			NA
78074	18	A03	139	3150780	+	1	414	NA	NA	NA	NA		between	pRL27	TagModule_0183			NA
78075	18	A04	140	136356	+	0.9684	282	NA	NA	NA	NA		between	pRL27	TagModule_0184			NA
78076	18	A05	139	3659348	-	0.9985	671	NA	NA	202608	332	-	gene	pRL27	TagModule_0185	SO3507		2971	conserved hypothetical protein (NCBI ptt file)	YES	YES
78077	18	A06	140	101306	-	0.9936	466	0.9936	466	NA	NA		between	pRL27	TagModule_0186			NA
78078	18	A07	139	2321648	+	0.9694	749	0.9678	590	NA	NA		between	pRL27	TagModule_0187			NA
78079	18	A08	140	30647	+	0.9901	801	NA	NA	203863	1073	+	gene	pRL27	TagModule_0188	SO_A0039		NA	hypothetical protein (NCBI)
78080	18	A09	139	4199806	-	0.9986	716	NA	NA	203130	269	+	gene	pRL27	TagModule_0189	SO4046		NA	hypothetical protein (NCBI ptt file)
78081	18	A10	139	728145	-	0.9843	509	NA	NA	199898	1109	-	gene	pRL27	TagModule_0190	SO0710		NA	hypothetical protein (NCBI ptt file)
78082	18	A11	139	3186107	+	1	337	NA	NA	202187	2821	-	gene	pRL27	TagModule_0191	SO3069		NA	conserved hypothetical protein (NCBI ptt file)
78083	18	A12	140	86840	+	0.9939	165	NA	NA	203920	1516	+	gene	pRL27	TagModule_0192	SOA0106		840	methyl-accepting chemotaxis protein (NCBI ptt file)
78084	18	B01	139	1690243	-	1	340	NA	NA	200772	1202	-	gene	pRL27	TagModule_0181	SO1606		2015	metallo-beta-lactamase superfamily protein (NCBI ptt file)
78085	18	B02	139	553727	+	0.9944	719	NA	NA	NA	NA		between	pRL27	TagModule_0182			NA
78086	18	B03	139	2406388	+	0.9425	837	0.9566	774	NA	NA		between	pRL27	TagModule_0183			NA
78087	18	B04	139	1133576	+	0.9704	566	NA	NA	200275	242	-	gene	pRL27	TagModule_0184	SO1094		NA	hypothetical Transcription elongation factor (NCBI ptt file)
78088	18	B05	139	1134146	-	0.9934	450	NA	NA	NA	NA		between	pRL27	TagModule_0185			NA
78089	18	B06	139	3678043	+	0.9799	926	NA	NA	202625	119	-	gene	pRL27	TagModule_0186	SO3524	pilE	4968	type IV pilus biogenesis protein PilE (NCBI ptt file)
78090	18	B07	139	86692	-	0.9681	894	NA	NA	199271	1067	+	gene	pRL27	TagModule_0187	SO0074		NA	hypothetical protein (NCBI ptt file)
78091	18	B08	139	1924959	-	0.9828	750	NA	NA	NA	NA		between	pRL27	TagModule_0188			NA
78092	18	B09	139	4662604	-	0.9764	917	NA	NA	203548	123	-	gene	pRL27	TagModule_0189	SO4473		3637	outer membrane protein, putative (NCBI ptt file)
78093	18	B10	139	4465473	-	0.9903	308	NA	NA	NA	NA		between	pRL27	TagModule_0190			NA
78094	18	B11	140	45009	+	0.9835	957	NA	NA	NA	NA		between	pRL27	TagModule_0191			NA
78095	18	B12	139	868101	-	0.934	303	NA	NA	200032	100	-	gene	pRL27	TagModule_0192	SO0846	napH	348	iron-sulfur cluster-binding protein napH (NCBI ptt file)	YES
78096	18	C01	139	3403462	-	0.9517	841	NA	NA	202374	478	-	gene	pRL27	TagModule_0181	SO3266		NA	conserved domain protein (NCBI ptt file)	YES	YES
78097	18	C02	139	4006404	-	0.9932	582	NA	NA	202945	1413	+	gene	pRL27	TagModule_0182	SO3859		2199	cyclic nucleotide phosphodiesterase, putative (NCBI ptt file)
78098	18	C03	139	4766012	+	1	127	NA	NA	203641	307	-	gene	pRL27	TagModule_0183	SO4571		583	transcriptional regulator, LysR family (NCBI ptt file)
78099	18	C04	140	115828	+	0.9906	637	0.9841	561	NA	NA		between	pRL27	TagModule_0184			NA
78100	18	C05	139	4862957	+	1	383	NA	NA	NA	NA		between	pRL27	TagModule_0185			NA
78101	18	C06	140	2534	-	0.9947	747	NA	NA	NA	NA		between	pRL27	TagModule_0186			NA
78102	18	C07	140	148167	-	0.9238	586	NA	NA	203964	730	-	gene	pRL27	TagModule_0187	SOA0160		627	esterase, putative (NCBI ptt file)
78103	18	C08	139	1104317	-	0.9956	456	NA	NA	200247	125	+	gene	pRL27	TagModule_0188	SO1065	fkpA	545	FKBP-type peptidyl-prolyl cis-trans isomerase FkpA (NCBI ptt file)
78104	18	C09	139	1584180	-	0.9955	672	NA	NA	370292	298	+	gene	pRL27	TagModule_0189	SO1508.1		NA	hypothetical protein (NCBI ptt file)
78105	18	C10	139	1839042	+	0.975	398	NA	NA	200921	410	+	gene	pRL27	TagModule_0190	SO1757		3708	conserved hypothetical protein (NCBI ptt file)	YES	YES
78106	18	C11	139	194958	-	0.997	328	NA	NA	199386	2470	+	gene	pRL27	TagModule_0191	SO0189		NA	fibronectin type III domain protein (NCBI ptt file)
78107	18	C12	139	4746955	+	1	530	NA	NA	203621	261	-	gene	pRL27	TagModule_0192	SO4550		NA	methyltransferase domain protein (NCBI ptt file)		YES
78108	18	D01	140	101314	+	0.9949	196	0.9949	196	NA	NA		between	pRL27	TagModule_0181			NA
78109	18	D02	139	4222115	+	0.9909	439	NA	NA	203152	671	+	gene	pRL27	TagModule_0182	SO4068		NA	hypothetical protein (NCBI ptt file)
78110	18	D03	139	4461526	-	0.9972	722	NA	NA	203361	297	+	gene	pRL27	TagModule_0183	SO4282	ktrB	168	potassium uptake protein KtrB (NCBI ptt file)
78111	18	D04	139	3769278	+	0.9877	404	NA	NA	202705	811	-	gene	pRL27	TagModule_0184	SO3608		NA	serine/threonine protein kinase (NCBI ptt file)
78112	18	D05	139	4546927	-	0.996	252	NA	NA	203432	33	-	gene	pRL27	TagModule_0185	SO4354		727	hypothetical Fe-S-cluster oxidoreductase (NCBI ptt file)
78113	18	D06	139	4453133	+	0.9912	677	NA	NA	NA	NA		between	pRL27	TagModule_0186			NA
78114	18	D07	139	4459411	-	0.9968	618	NA	NA	203359	313	-	gene	pRL27	TagModule_0187	SO4280		NA	hypothetical protein (NCBI ptt file)
78115	18	D08	139	14855	-	0.9903	716	NA	NA	199210	544	+	gene	pRL27	TagModule_0188	SO0013		1639	hypothetical protein (NCBI ptt file)		YES
78116	18	D09	139	4662849	+	0.9911	673	NA	NA	NA	NA		between	pRL27	TagModule_0189			NA
78117	18	D10	139	692280	+	0.9772	524	NA	NA	199862	46	+	gene	pRL27	TagModule_0190	SO0674		4388	prophage MuSo1, protein Gp32, putative (NCBI ptt file)
78118	18	D11	139	2562537	+	1	418	NA	NA	NA	NA		between	pRL27	TagModule_0191			NA
78119	18	D12	139	3859601	+	0.9768	931	1	95	NA	NA		between	pRL27	TagModule_0192			NA
78120	18	E01	139	3324640	-	0.9832	882	NA	NA	202296	817	-	gene	pRL27	TagModule_0181	SO3186	rfbA	1209	glucose-1-phosphate-thymidylyltransferase (NCBI ptt file)
78121	18	E02	139	2362470	-	0.9891	825	NA	NA	NA	NA		between	pRL27	TagModule_0182			NA
78122	18	E03	139	1482314	-	0.9635	831	NA	NA	200597	825	+	gene	pRL27	TagModule_0183	SO1422		583	transcriptional regulator, LysR family (NCBI ptt file)
78123	18	E04	139	2397241	-	0.9875	638	0.989	638	NA	NA		between	pRL27	TagModule_0184			NA
78124	18	E05	139	1564314	-	1	593	NA	NA	200666	1806	+	gene	pRL27	TagModule_0185	SO1495	glgX	1523	glycogen operon protein (NCBI ptt file)
78125	18	E06	139	706257	-	0.9796	537	NA	NA	199876	342	+	gene	pRL27	TagModule_0186	SO0688		NA	hypothetical protein (NCBI ptt file)	YES	YES
78126	18	E07	139	3118440	+	0.9944	538	NA	NA	202122	193	+	gene	pRL27	TagModule_0187	SO3000		NA	conserved hypothetical protein (NCBI ptt file)	YES	YES
78127	18	E08	139	1627445	+	0.9522	622	NA	NA	200719	208	-	gene	pRL27	TagModule_0188	SO1551		2199	GGDEF domain protein (NCBI ptt file)	YES
78128	18	E10	139	131139	+	0.9512	826	NA	NA	199318	612	+	gene	pRL27	TagModule_0190	SO0121		668	hypothetical Small-conductance mechanosensitive channel (NCBI ptt file)
78129	18	E12	140	81434	-	0.9935	611	NA	NA	203916	36	-	gene	pRL27	TagModule_0192	SOA0100		1574	conserved hypothetical protein (NCBI ptt file)
78130	18	F02	140	37697	+	0.9739	875	NA	NA	203872	147	-	gene	pRL27	TagModule_0182	SOA0048		1506	prolyl oligopeptidase family protein (NCBI ptt file)
78131	18	F03	139	511198	+	0.9901	798	NA	NA	199678	566	+	gene	pRL27	TagModule_0183	SO0487	nosF	1131	copper ABC transporter, ATP-binding protein (NCBI ptt file)
78132	18	F04	139	481191	-	0.9913	687	NA	NA	199647	1146	-	gene	pRL27	TagModule_0184	SO0455		4666	hypothetical transporter (NCBI ptt file)
78133	18	F06	139	4479197	+	0.9617	285	0.9773	218	NA	NA		between	pRL27	TagModule_0186			NA
78134	18	F07	139	20038	+	1	471	NA	NA	199214	2052	-	gene	pRL27	TagModule_0187	SO0017		1228	hypothetical amidohydrolase (NCBI ptt file)
78135	18	F09	139	2087051	+	0.9984	629	NA	NA	NA	NA		between	pRL27	TagModule_0189			NA
78136	18	F10	139	477439	-	0.9863	507	NA	NA	199642	1024	-	gene	pRL27	TagModule_0190	SO0450		2814	major facilitator family protein (NCBI ptt file)
78137	18	F11	139	2810630	+	1	481	NA	NA	NA	NA		between	pRL27	TagModule_0191			NA
78138	18	F12	139	1588911	+	1	583	NA	NA	NA	NA		between	pRL27	TagModule_0192			NA
78139	18	G02	139	3857762	+	0.9969	638	NA	NA	202803	263	-	gene	pRL27	TagModule_0182	SO3709		614	ABC transporter, periplasmic substrate-binding protein, putative (NCBI ptt file)		YES
78140	18	G03	139	1709036	+	0.9908	323	NA	NA	200791	1188	-	gene	pRL27	TagModule_0183	SO1626	glnD	2844	protein-P-II uridylyltransferase (NCBI ptt file)	YES	YES
78141	18	G04	139	2095500	-	0.9906	319	NA	NA	201156	4	+	gene	pRL27	TagModule_0184	SO1995		1047	peptidyl-prolyl cis-trans isomerase, FkbP family (NCBI ptt file)	YES	YES
78142	18	G05	139	4499060	+	0.9565	138	0.9565	138	NA	NA		between	pRL27	TagModule_0185			NA
78143	18	G07	139	496470	-	0.9283	484	NA	NA	199663	937	+	gene	pRL27	TagModule_0187	SO0471		2070	hypothetical dioxygenase (NCBI ptt file)
78144	18	G08	139	1482336	-	1	590	NA	NA	200597	847	+	gene	pRL27	TagModule_0188	SO1422		583	transcriptional regulator, LysR family (NCBI ptt file)
78145	18	G09	139	4584843	+	0.9937	475	NA	NA	203466	276	+	gene	pRL27	TagModule_0189	SO4388		745	DNA-binding response regulator (NCBI ptt file)
78146	18	G10	139	3899867	+	0.9901	799	0.9931	288	NA	NA		between	pRL27	TagModule_0190			NA
78147	18	G11	139	1066159	-	0.9887	874	NA	NA	200212	248	+	gene	pRL27	TagModule_0191	SO1029		NA	hypothetical protein (NCBI ptt file)	YES	YES
78148	18	G12	139	907794	+	0.9924	392	NA	NA	NA	NA		between	pRL27	TagModule_0192			NA
78149	18	H02	139	3562639	-	1	335	NA	NA	NA	NA		between	pRL27	TagModule_0182			NA
78150	18	H03	139	4670966	-	0.9877	487	NA	NA	203555	1494	+	gene	pRL27	TagModule_0183	SO4480	aldA	1012	aldehyde dehydrogenase (NCBI ptt file)
78151	18	H04	139	4132879	-	1	420	NA	NA	203078	414	-	gene	pRL27	TagModule_0184	SO3994		NA	hypothetical protein (NCBI ptt file)
78152	18	H07	140	21077	-	0.9644	279	0.9644	279	NA	NA		between	pRL27	TagModule_0187			NA
78153	18	H08	140	133593	-	0.988	331	0.988	331	NA	NA		between	pRL27	TagModule_0188			NA
78154	18	H09	139	1505566	-	0.9919	495	NA	NA	200614	629	+	gene	pRL27	TagModule_0189	SO1442		NA	conserved hypothetical protein (NCBI ptt file)
78155	18	H10	140	84571	+	0.9916	592	NA	NA	203919	119	+	gene	pRL27	TagModule_0190	SOA0105		3316	ISSod8, transposase (NCBI ptt file)
78156	18	H11	139	4786103	-	0.9298	483	NA	NA	NA	NA		between	pRL27	TagModule_0191			NA
78157	18	H12	139	702192	-	0.9839	186	NA	NA	199870	1270	+	gene	pRL27	TagModule_0192	SO0682		NA	hypothetical protein (NCBI ptt file)
78158	19	A01	139	1563777	+	0.9842	566	NA	NA	200666	1269	+	gene	pRL27	TagModule_0193	SO1495	glgX	1523	glycogen operon protein (NCBI ptt file)
78159	19	A02	139	4191173	-	0.9901	501	NA	NA	203118	1596	+	gene	pRL27	TagModule_0194	SO4034	deaD	513	ATP-dependent RNA helicase DeaD (NCBI ptt file)
78160	19	A03	139	1946077	-	0.9948	581	NA	NA	201016	885	+	gene	pRL27	TagModule_0195	SO1854		NA	hypothetical protein (NCBI ptt file)	YES	YES
78161	19	A04	139	2796434	-	0.9773	701	NA	NA	201804	203	+	gene	pRL27	TagModule_0196	SO2666		NA	hypothetical protein (NCBI ptt file)	YES
78162	19	A05	139	397660	+	0.9876	238	NA	NA	199576	1389	-	gene	pRL27	TagModule_0197	SO0383	hsdM-1	286	type I restriction-modification system, M subunit (NCBI ptt file)
78163	19	A06	139	4467411	+	0.9836	305	NA	NA	NA	NA		between	pRL27	TagModule_0198			NA
78164	19	A07	139	4037844	-	1	577	NA	NA	202977	413	-	gene	pRL27	TagModule_0199	SO3892		NA	hypothetical protein (NCBI ptt file)	YES	YES
78165	19	A08	139	1623658	+	0.9802	943	NA	NA	200716	119	-	gene	pRL27	TagModule_0200	SO1548		NA	hypothetical protein (NCBI ptt file)	YES
78166	19	A09	139	4583748	+	0.9865	948	NA	NA	203465	716	+	gene	pRL27	TagModule_0285	SO4387		642	sensor histidine kinase (NCBI ptt file)
78167	19	A10	139	3136610	-	0.983	705	NA	NA	202146	548	+	gene	pRL27	TagModule_0202	SO3024	trpA	159	tryptophan synthase, alpha subunit (NCBI ptt file)	YES
78168	19	A11	139	388308	-	1	629	NA	NA	NA	NA		between	pRL27	TagModule_0203			NA
78169	19	A12	140	82160	-	0.9844	512	0.9844	512	NA	NA		between	pRL27	TagModule_0204			NA
78170	19	B01	139	2883603	-	0.9967	605	NA	NA	201896	844	+	gene	pRL27	TagModule_0193	SO2760	purM	150	phosphoribosylformylglycinamidine cyclo-ligase (NCBI ptt file)
78171	19	B02	140	28339	-	0.9832	595	0.9817	599	NA	NA		between	pRL27	TagModule_0194			NA
78172	19	B03	139	4817581	-	0.9766	427	NA	NA	203691	178	-	gene	pRL27	TagModule_0195	SO4621		NA	hypothetical protein (NCBI ptt file)
78173	19	B04	139	3040237	-	0.9788	837	NA	NA	202035	890	-	gene	pRL27	TagModule_0196	SO2911		2116	formate transporter, putative (NCBI ptt file)
78174	19	B05	139	2172438	-	0.9948	575	NA	NA	NA	NA		between	pRL27	TagModule_0197			NA
78175	19	B06	140	41960	+	0.9615	78	NA	NA	203874	400	-	gene	pRL27	TagModule_0198	SOA0050		1566	toxin secretion, membrane fusion protein (NCBI ptt file)
78176	19	B07	139	3338010	+	0.993	714	NA	NA	202305	623	-	gene	pRL27	TagModule_0199	SO3196		NA	response regulator (NCBI ptt file)
78177	19	B08	139	100000	+	0.9865	806	NA	NA	199288	90	-	gene	pRL27	TagModule_0200	SO0091		664	hypothetical protein (NCBI ptt file)		YES
78178	19	B09	139	1564367	-	1	542	NA	NA	200666	1859	+	gene	pRL27	TagModule_0285	SO1495	glgX	1523	glycogen operon protein (NCBI ptt file)
78179	19	B10	139	3953080	-	0.9884	939	NA	NA	202890	769	+	gene	pRL27	TagModule_0202	SO3800		NA	serine protease, subtilase family (NCBI ptt file)
78180	19	B11	139	2239426	+	0.9877	728	NA	NA	201290	292	+	gene	pRL27	TagModule_0203	SO2133		NA	hypothetical protein (NCBI ptt file)
78181	19	B12	139	1853380	+	0.9949	584	NA	NA	370272	101	-	gene	pRL27	TagModule_0204	SO1771.2		NA	hypothetical catalase (NCBI ptt file)
78182	19	C01	139	3561742	-	1	235	NA	NA	202529	164	+	gene	pRL27	TagModule_0193	SO3422	yfiA-2	1544	ribosomal subunit interface protein (NCBI ptt file)	YES
78183	19	C02	139	490478	-	0.9482	386	NA	NA	NA	NA		between	pRL27	TagModule_0194			NA
78184	19	C03	139	3451885	-	0.9949	586	NA	NA	202410	36	-	gene	pRL27	TagModule_0195	SO3302		NA	serine protease, subtilase family (NCBI ptt file)
78185	19	C04	139	3045849	+	0.9178	365	NA	NA	202039	0	+	gene	pRL27	TagModule_0196	SO2915	ackA	282	acetate kinase (NCBI ptt file)
78186	19	C05	139	3439612	-	0.9941	674	NA	NA	202402	654	+	gene	pRL27	TagModule_0197	SO3294	xseA	1570	exodeoxyribonuclease VII, large subunit (NCBI ptt file)
78187	19	C06	139	340410	-	0.9651	946	NA	NA	199535	82	+	gene	pRL27	TagModule_0198	SO0340	ilvE	115	branched-chain amino acid aminotransferase (NCBI ptt file)
78188	19	C07	139	799075	-	0.994	500	NA	NA	199969	334	-	gene	pRL27	TagModule_0199	SO0783		3972	hypothetical protein (NCBI ptt file)
78189	19	C08	139	1161772	+	0.9847	903	NA	NA	NA	NA		between	pRL27	TagModule_0200			NA
78190	19	C09	139	4735079	+	0.9897	680	NA	NA	203610	3869	-	gene	pRL27	TagModule_0285	SO4539		NA	serine protease, subtilase family (NCBI ptt file)
78191	19	C10	139	3790580	-	0.9875	317	NA	NA	202728	480	-	gene	pRL27	TagModule_0202	SO3632		NA	conserved hypothetical protein (NCBI ptt file)		YES
78192	19	C11	139	647420	-	0.9876	640	NA	NA	NA	NA		between	pRL27	TagModule_0203			NA
78193	19	C12	139	728041	+	0.9897	97	NA	NA	199898	1213	-	gene	pRL27	TagModule_0204	SO0710		NA	hypothetical protein (NCBI ptt file)
78194	19	D01	139	2485342	-	0.9712	791	NA	NA	201527	143	-	gene	pRL27	TagModule_0193	SO2383		NA	hypothetical protein (NCBI ptt file)		YES
78195	19	D02	139	417009	+	0.985	799	NA	NA	NA	NA		between	pRL27	TagModule_0194			NA
78196	19	D03	139	4605048	-	0.9807	714	NA	NA	203487	1394	+	gene	pRL27	TagModule_0195	SO4410	glnA	174	glutamine synthetase, type I (NCBI ptt file)
78197	19	D04	140	65072	+	0.9805	813	NA	NA	2200888	497	-	gene	pRL27	TagModule_0196	SO_A0180		NA	hypothetical protein (NCBI)
78198	19	D05	139	4463142	-	0.9904	309	NA	NA	203362	543	+	gene	pRL27	TagModule_0197	SO4283		1477	apbE family protein (NCBI ptt file)
78199	19	D06	140	44965	-	0.9758	530	NA	NA	NA	NA		between	pRL27	TagModule_0198			NA
78200	19	D07	139	1663033	-	0.9657	495	NA	NA	NA	NA		between	pRL27	TagModule_0199			NA
78201	19	D08	139	3107066	+	0.9824	1005	NA	NA	202101	933	-	gene	pRL27	TagModule_0200	SO2978		NA	prophage LambdaSo, site-specific recombinase, phage integrase family (NCBI ptt file)
78202	19	D09	139	4617544	+	0.9955	671	NA	NA	NA	NA		between	pRL27	TagModule_0285			NA
78203	19	D10	139	4488190	-	0.9984	612	NA	NA	203391	2232	-	gene	pRL27	TagModule_0202	SO4312		3072	adenylate cyclase CyaA, putative (NCBI ptt file)
78204	19	D11	139	1971472	+	0.9948	580	0.9784	278	NA	NA		between	pRL27	TagModule_0203			NA
78205	19	D12	139	2663927	-	0.9908	545	NA	NA	201676	540	+	gene	pRL27	TagModule_0204	SO2536		1960	oxidoreductase, acyl-CoA dehydrogenase family (NCBI ptt file)
78206	19	E01	139	725247	+	0.9924	787	NA	NA	199895	421	-	gene	pRL27	TagModule_0193	SO0707		NA	hypothetical protein (NCBI ptt file)
78207	19	E02	139	432297	+	0.9079	315	NA	NA	199609	1020	-	gene	pRL27	TagModule_0194	SO0416		2804	type IV pilus biogenesis protein PilB (NCBI ptt file)
78208	19	E03	139	2087432	+	0.9883	845	NA	NA	NA	NA		between	pRL27	TagModule_0195			NA
78209	19	E04	139	3322776	-	0.9121	306	NA	NA	202294	694	-	gene	pRL27	TagModule_0196	SO3184		NA	conserved hypothetical protein (NCBI ptt file)
78210	19	E05	139	4765398	-	0.9625	427	NA	NA	203641	921	-	gene	pRL27	TagModule_0197	SO4571		583	transcriptional regulator, LysR family (NCBI ptt file)
78211	19	E06	139	4450966	+	0.9808	619	NA	NA	NA	NA		between	pRL27	TagModule_0198			NA
78212	19	E07	139	3445336	-	0.9718	935	NA	NA	202407	72	-	gene	pRL27	TagModule_0199	SO3299		2986	Pal/histidase family protein (NCBI ptt file)
78213	19	E08	140	4440	-	0.9888	710	NA	NA	203831	1210	-	gene	pRL27	TagModule_0200	SOA0004		NA	type II DNA modification methyltransferase (NCBI ptt file)
78214	19	E09	139	2985703	-	0.9964	553	NA	NA	201987	353	-	gene	pRL27	TagModule_0285	SO2861		451	conserved hypothetical protein (NCBI ptt file)	YES
78215	19	E10	139	2678410	-	0.9821	992	NA	NA	201684	2445	+	gene	pRL27	TagModule_0202	SO2544		642	sensor histidine kinase/response regulator (NCBI ptt file)
78216	19	E11	139	1929277	-	0.9929	140	NA	NA	201001	446	-	gene	pRL27	TagModule_0203	SO1839		834	hypothetical protein (NCBI ptt file)	YES	YES
78217	19	F01	139	4169399	+	0.9902	510	NA	NA	203103	2621	+	gene	pRL27	TagModule_0193	SO4019		NA	hypothetical protein (NCBI ptt file)
78218	19	F02	139	4791367	+	0.9708	511	NA	NA	203668	1578	+	gene	pRL27	TagModule_0194	SO4598		3696	heavy metal efflux pump, CzcA family (NCBI ptt file)
78219	19	F03	140	42516	+	0.9915	232	NA	NA	NA	NA		between	pRL27	TagModule_0195			NA
78220	19	F04	139	779630	+	0.9763	295	NA	NA	199951	55	-	gene	pRL27	TagModule_0196	SO0765		1280	threonine efflux protein, putative (NCBI ptt file)		YES
78221	19	F05	139	4193537	-	0.9881	589	NA	NA	203122	212	+	gene	pRL27	TagModule_0197	SO4038		NA	hypothetical protein (NCBI ptt file)	YES	YES
78222	19	F06	139	3201150	-	0.9918	606	NA	NA	202198	437	+	gene	pRL27	TagModule_0198	SO3081		2840	Smr domain protein (NCBI ptt file)	YES	YES
78223	19	F07	139	1800389	-	0.974	346	NA	NA	200876	124	+	gene	pRL27	TagModule_0199	SO1712		3710	transcriptional regulator, putative (NCBI ptt file)
78224	19	F08	139	2848937	-	0.9419	465	0.9376	465	NA	NA		between	pRL27	TagModule_0200			NA
78225	19	F09	140	44523	+	0.9922	765	NA	NA	NA	NA		between	pRL27	TagModule_0285			NA
78226	19	F10	140	41234	+	0.9988	805	NA	NA	203874	1126	-	gene	pRL27	TagModule_0202	SOA0050		1566	toxin secretion, membrane fusion protein (NCBI ptt file)
78227	19	F11	139	551115	+	0.9971	682	NA	NA	199719	242	+	gene	pRL27	TagModule_0203	SO0528		NA	conserved hypothetical protein (NCBI ptt file)
78228	19	G01	139	3481336	+	0.998	511	NA	NA	202442	573	+	gene	pRL27	TagModule_0193	SO3334		NA	GGDEF family protein (NCBI ptt file)
78229	19	G03	139	2821216	+	0.9685	658	NA	NA	201842	107	+	gene	pRL27	TagModule_0195	SO2704		NA	prophage MuSo2, tail fiber protein, putative (NCBI ptt file)
78230	19	G04	139	3769799	-	0.9788	424	NA	NA	202705	290	-	gene	pRL27	TagModule_0196	SO3608		NA	serine/threonine protein kinase (NCBI ptt file)
78231	19	G05	139	4464012	-	0.9857	831	NA	NA	203363	148	+	gene	pRL27	TagModule_0197	SO4284		3328	ISSod5, transposase (NCBI ptt file)
78232	19	G06	140	136520	-	0.9881	754	NA	NA	NA	NA		between	pRL27	TagModule_0198			NA
78233	19	G07	139	1647646	-	0.9808	469	NA	NA	NA	NA		between	pRL27	TagModule_0199			NA
78234	19	G08	139	4555744	+	0.9701	468	NA	NA	203438	775	-	gene	pRL27	TagModule_0200	SO4360		NA	decaheme cytochrome c (NCBI ptt file)
78235	19	G09	139	4551625	+	0.9918	487	NA	NA	203436	1979	-	gene	pRL27	TagModule_0285	SO4358	dmaA-2	243	anaerobic dimethyl sulfoxide reductase, A subunit (NCBI ptt file)
78236	19	G10	140	21077	-	0.9848	523	0.9848	523	NA	NA		between	pRL27	TagModule_0202			NA
78237	19	G11	140	137484	+	0.9697	962	NA	NA	NA	NA		between	pRL27	TagModule_0203			NA
78238	19	H01	139	3929085	-	1	325	NA	NA	202869	212	-	gene	pRL27	TagModule_0193	SO3778		1437	adenylate cyclase CyaB, putative (NCBI ptt file)
78239	19	H02	139	1022103	-	0.9949	197	NA	NA	200173	711	+	gene	pRL27	TagModule_0194	SO0989		583	transcriptional regulator, LysR family (NCBI ptt file)	YES	YES
78240	19	H03	139	3666008	+	0.9935	155	NA	NA	202614	990	-	gene	pRL27	TagModule_0195	SO3513		644	tryptophan halogenase, putative (NCBI ptt file)
78241	19	H04	139	2881471	-	1	400	NA	NA	201894	165	-	gene	pRL27	TagModule_0196	SO2758		2199	GGDEF family protein (NCBI ptt file)
78242	19	H05	139	729531	-	0.9562	274	NA	NA	NA	NA		between	pRL27	TagModule_0197			NA
78243	19	H06	139	4632772	+	0.9558	317	NA	NA	203520	2	+	gene	pRL27	TagModule_0198	SO4445		642	response regulator/sensor histidine kinase (NCBI ptt file)
78244	19	H07	139	1096416	-	1	49	NA	NA	200238	423	-	gene	pRL27	TagModule_0199	SO1056		840	methyl-accepting chemotaxis protein (NCBI ptt file)
78245	19	H08	139	2244823	+	0.9744	585	NA	NA	201293	4	-	gene	pRL27	TagModule_0200	SO2136	adhE	1454	aldehyde-alcohol dehydrogenase (NCBI ptt file)
78246	19	H09	139	954753	-	0.9129	287	NA	NA	200109	259	-	gene	pRL27	TagModule_0285	SO0925		2199	GGDEF domain protein (NCBI ptt file)		YES
78247	19	H10	139	3048173	+	0.9887	177	NA	NA	202040	1003	+	gene	pRL27	TagModule_0202	SO2916	pta	280	phosphate acetyltransferase (NCBI ptt file)
78338	20	A01	139	3977005	+	0.9957	688	NA	NA	202913	166	+	gene	pRL27	TagModule_0205	SO3826		NA	conserved domain protein (NCBI ptt file)	YES	YES
78339	20	A02	139	4467304	+	0.9438	267	NA	NA	203366	78	-	gene	pRL27	TagModule_0206	SO4287	motA	1291	chemotaxis motA protein (NCBI ptt file)		YES
78340	20	A03	139	1122197	+	0.9412	304	NA	NA	200263	732	-	gene	pRL27	TagModule_0207	SO1081		NA	hypothetical protein (NCBI ptt file)
78341	20	A04	139	2239497	-	0.9917	360	NA	NA	201290	363	+	gene	pRL27	TagModule_0208	SO2133		NA	hypothetical protein (NCBI ptt file)
78342	20	A05	139	2135706	-	1	65	NA	NA	201196	523	-	gene	pRL27	TagModule_0209	SO2039		2200	conserved domain protein (NCBI ptt file)
78343	20	A06	139	4914829	+	1	92	NA	NA	203781	1239	-	gene	pRL27	TagModule_0210	SO4712		1129	ABC transporter, ATP-binding protein, putative (NCBI ptt file)
78344	20	A07	139	4303019	+	1	527	NA	NA	203228	1251	-	gene	pRL27	TagModule_0211	SO4145		2200	conserved hypothetical protein (NCBI ptt file)
78345	20	A08	139	4805569	+	0.9813	691	NA	NA	203680	27	-	gene	pRL27	TagModule_0212	SO4610		NA	hypothetical protein (NCBI ptt file)	YES
78346	20	A09	139	4554456	+	0.9724	508	NA	NA	203437	1137	-	gene	pRL27	TagModule_0213	SO4359		NA	outer membrane protein, putative (NCBI ptt file)
78347	20	A10	139	289809	-	1	566	NA	NA	199476	1047	+	gene	pRL27	TagModule_0214	SO0281		4972	type IV pilus biogenesis protein PilM (NCBI ptt file)
78348	20	A11	139	4020477	-	0.9766	921	NA	NA	202959	577	+	gene	pRL27	TagModule_0215	SO3873		NA	hypothetical protein (NCBI ptt file)
78349	20	A12	139	1662977	+	0.9597	545	NA	NA	NA	NA		between	pRL27	TagModule_0216			NA
78350	20	B01	139	4118685	-	0.9894	564	NA	NA	203065	799	+	gene	pRL27	TagModule_0205	SO3981	narQ	3850	nitrate/nitrite sensor protein NarQ (NCBI ptt file)
78351	20	B03	140	42387	-	0.9943	694	NA	NA	NA	NA		between	pRL27	TagModule_0207			NA
78352	20	B04	140	88519	+	0.9957	467	NA	NA	NA	NA		between	pRL27	TagModule_0208			NA
78353	20	B05	139	772595	+	1	445	NA	NA	199942	402	-	gene	pRL27	TagModule_0209	SO0756	aroG	722	phospho-2-dehydro-3-deoxyheptonate aldolase, phe-sensitive (NCBI ptt file)
78354	20	B06	139	4554267	-	0.9969	642	NA	NA	203437	1326	-	gene	pRL27	TagModule_0210	SO4359		NA	outer membrane protein, putative (NCBI ptt file)
78355	20	B07	139	3680243	+	1	241	NA	NA	202626	1436	-	gene	pRL27	TagModule_0211	SO3525		3419	type IV pilin biogenesis protein, putative (NCBI ptt file)
78356	20	B08	139	1042903	-	1	444	NA	NA	200190	753	+	gene	pRL27	TagModule_0212	SO1007		1757	hypothetical Na+/H+ antiporter (NCBI ptt file)
78357	20	B09	139	1578026	-	0.9801	551	NA	NA	NA	NA		between	pRL27	TagModule_0213			NA
78358	20	B10	139	2490311	+	0.9982	563	NA	NA	201531	197	-	gene	pRL27	TagModule_0214	SO2387		3148	conserved hypothetical protein (NCBI ptt file)	YES	YES
78359	20	B11	140	26206	-	0.9595	881	0.9583	880	NA	NA		between	pRL27	TagModule_0215			NA
78360	20	B12	140	22380	-	0.9867	971	NA	NA	203854	110	-	gene	pRL27	TagModule_0216	SOA0030		NA	hypothetical protein (NCBI ptt file)	YES
78361	20	C01	139	3989730	+	0.9962	524	NA	NA	NA	NA		between	pRL27	TagModule_0205			NA
78362	20	C02	139	482151	-	0.9969	633	NA	NA	199647	186	-	gene	pRL27	TagModule_0206	SO0455		4666	hypothetical transporter (NCBI ptt file)
78363	20	C03	139	919231	+	0.998	506	NA	NA	NA	NA		between	pRL27	TagModule_0207			NA
78364	20	C05	139	3511004	-	0.9953	211	NA	NA	202476	348	+	gene	pRL27	TagModule_0209	SO3368	mutY	1194	A/G-specific adenine glycosylase (NCBI ptt file)	YES
78365	20	C06	139	85980	+	0.9747	593	NA	NA	199271	355	+	gene	pRL27	TagModule_0210	SO0074		NA	hypothetical protein (NCBI ptt file)
78366	20	C07	139	2796269	+	0.9414	307	NA	NA	201804	38	+	gene	pRL27	TagModule_0211	SO2666		NA	hypothetical protein (NCBI ptt file)		YES
78367	20	C08	139	3503907	-	0.9906	530	NA	NA	202469	322	+	gene	pRL27	TagModule_0212	SO3361		4805	conserved hypothetical protein (NCBI ptt file)
78368	20	C09	139	4434868	+	0.9847	588	NA	NA	203339	562	+	gene	pRL27	TagModule_0213	SO4258		NA	site-specific recombinase, phage integrase family (NCBI ptt file)	YES
78369	20	C10	139	3208827	+	0.9844	450	NA	NA	202201	3792	+	gene	pRL27	TagModule_0214	SO3084		5001	sensory box protein (NCBI ptt file)
78370	20	C12	139	4717605	+	0.9628	771	NA	NA	203597	1513	-	gene	pRL27	TagModule_0216	SO4523	irgA	4771	iron-regulated outer membrane virulence protein (NCBI ptt file)
78371	20	D01	140	156186	-	0.998	490	0.998	490	NA	NA		between	pRL27	TagModule_0205			NA
78372	20	D02	139	4467864	+	1	235	NA	NA	203367	320	-	gene	pRL27	TagModule_0206	SO4288		3932	exopolysaccharide synthesis protein, putative (NCBI ptt file)
78373	20	D03	139	2392336	-	0.9834	657	NA	NA	201430	914	-	gene	pRL27	TagModule_0207	SO2280		2814	bicyclomycin resistance protein (NCBI ptt file)	YES	YES
78374	20	D04	139	4021393	+	0.9585	333	NA	NA	202960	174	+	gene	pRL27	TagModule_0208	SO3874		583	transcriptional regulator, LysR family (NCBI ptt file)
78375	20	D05	139	817110	-	0.92	200	NA	NA	199991	440	-	gene	pRL27	TagModule_0209	SO0805		NA	CBS domain protein (NCBI ptt file)
78376	20	D06	139	3862621	-	1	299	NA	NA	NA	NA		between	pRL27	TagModule_0210			NA
78377	20	D07	139	3896640	+	0.9757	573	NA	NA	202842	401	-	gene	pRL27	TagModule_0211	SO3749		NA	hypothetical protein (NCBI ptt file)	YES
78378	20	D09	139	4747887	+	0.9813	695	NA	NA	NA	NA		between	pRL27	TagModule_0213			NA
78379	20	D10	139	605274	+	0.9944	536	NA	NA	199768	2197	+	gene	pRL27	TagModule_0214	SO0578		NA	hypothetical protein (NCBI ptt file)
78380	20	D11	139	3208353	-	0.9792	858	NA	NA	202201	3318	+	gene	pRL27	TagModule_0215	SO3084		5001	sensory box protein (NCBI ptt file)
78381	20	D12	139	950057	+	0.9826	516	NA	NA	200103	672	+	gene	pRL27	TagModule_0216	SO0919		814	serine transporter, putative (NCBI ptt file)
78382	20	E01	139	4252664	+	0.9912	455	NA	NA	203178	1101	-	gene	pRL27	TagModule_0205	SO4094	cafA	1530	ribonuclease G (NCBI ptt file)
78383	20	E02	140	58451	+	0.9858	838	NA	NA	NA	NA		between	pRL27	TagModule_0206			NA
78384	20	E03	139	3458432	+	0.9486	428	NA	NA	202414	277	-	gene	pRL27	TagModule_0207	SO3306		642	sensor histidine kinase (NCBI ptt file)
78385	20	E04	139	2865245	+	0.958	451	NA	NA	201882	1180	+	gene	pRL27	TagModule_0208	SO2744		1061	helicase (NCBI ptt file)	YES
78386	20	E05	139	985214	+	0.9826	800	NA	NA	200133	202	+	gene	pRL27	TagModule_0209	SO0949	brnQ	1114	branched-chain amino acid transport system II carrier protein BrnQ (NCBI ptt file)
78387	20	E07	139	3446945	+	0.9948	380	NA	NA	202409	444	-	gene	pRL27	TagModule_0211	SO3301		1053	flavocytochrome c flavin subunit (NCBI ptt file)
78388	20	E08	139	2630948	+	0.9834	359	NA	NA	201647	788	-	gene	pRL27	TagModule_0212	SO2506	uvrB	556	excinuclease ABC, B subunit (NCBI ptt file)		YES
78389	20	E09	139	3477051	-	0.9631	981	NA	NA	202436	392	-	gene	pRL27	TagModule_0213	SO3328		NA	acetyltransferase, GNAT family (NCBI ptt file)
78390	20	E10	139	4735595	+	0.9888	619	NA	NA	203610	3353	-	gene	pRL27	TagModule_0214	SO4539		NA	serine protease, subtilase family (NCBI ptt file)
78391	20	E11	139	4375355	+	0.9728	659	NA	NA	203290	764	+	gene	pRL27	TagModule_0215	SO4208	hemB-2	113	delta-aminolevulinic acid dehydratase (NCBI ptt file)	YES	YES
78392	20	E12	139	2143684	+	0.9898	776	NA	NA	201202	449	+	gene	pRL27	TagModule_0216	SO2045		NA	cation efflux family protein (NCBI ptt file)		YES
78393	20	F01	139	2657803	-	0.9817	547	0.9817	547	NA	NA		between	pRL27	TagModule_0205			NA
78394	20	F02	139	4624255	-	1	469	NA	NA	203510	122	+	gene	pRL27	TagModule_0206	SO4435		NA	hypothetical protein (NCBI ptt file)	YES
78395	20	F03	139	3338264	-	0.9755	571	NA	NA	202305	369	-	gene	pRL27	TagModule_0207	SO3196		NA	response regulator (NCBI ptt file)
78396	20	F04	139	4453242	-	0.9412	236	NA	NA	203353	769	-	gene	pRL27	TagModule_0208	SO4274		1968	undecaprenol kinase, putative (NCBI ptt file)
78397	20	F05	139	4556131	-	0.998	509	NA	NA	203438	388	-	gene	pRL27	TagModule_0209	SO4360		NA	decaheme cytochrome c (NCBI ptt file)
78398	20	F06	139	2849899	+	0.9598	348	0.976	123	NA	NA		between	pRL27	TagModule_0210			NA
78399	20	F07	139	4546458	-	0.995	396	NA	NA	203431	329	+	gene	pRL27	TagModule_0211	SO4353		NA	hypothetical protein (NCBI ptt file)
78400	20	F08	139	4631503	-	1	681	NA	NA	203518	331	+	gene	pRL27	TagModule_0212	SO4443		NA	hypothetical protein (NCBI ptt file)
78401	20	F09	140	69262	+	0.9748	671	NA	NA	NA	NA		between	pRL27	TagModule_0213			NA
78402	20	F10	140	86808	+	0.9981	519	NA	NA	203920	1484	+	gene	pRL27	TagModule_0214	SOA0106		840	methyl-accepting chemotaxis protein (NCBI ptt file)
78403	20	F11	139	801508	+	0.9801	943	NA	NA	NA	NA		between	pRL27	TagModule_0215			NA
78404	20	F12	140	136356	+	0.9723	357	NA	NA	NA	NA		between	pRL27	TagModule_0216			NA
78405	20	G01	139	4466097	+	0.995	597	NA	NA	203365	546	-	gene	pRL27	TagModule_0205	SO4286	motB	1360	chemotaxis motB protein (NCBI ptt file)
78406	20	G02	139	3322836	-	0.9614	361	NA	NA	202294	634	-	gene	pRL27	TagModule_0206	SO3184		NA	conserved hypothetical protein (NCBI ptt file)
78407	20	G03	139	490028	+	1	576	NA	NA	NA	NA		between	pRL27	TagModule_0207			NA
78408	20	G04	139	3515385	+	1	545	NA	NA	NA	NA		between	pRL27	TagModule_0208			NA
78409	20	G05	139	1369098	-	0.9904	627	NA	NA	200488	557	-	gene	pRL27	TagModule_0209	SO1313		2377	conserved hypothetical protein (NCBI ptt file)		YES
78410	20	G06	139	3202523	+	0.9606	431	NA	NA	202200	562	+	gene	pRL27	TagModule_0210	SO3083		1025	peptidase, M16 family (NCBI ptt file)
78411	20	G07	139	3550581	-	0.9153	307	NA	NA	202518	635	-	gene	pRL27	TagModule_0211	SO3411		4946	protease, putative (NCBI ptt file)
78412	20	G09	140	144885	+	0.9887	965	NA	NA	203958	291	-	gene	pRL27	TagModule_0213	SO_A0154		845	heavy metal efflux protein, putative (NCBI)		YES
78413	20	G10	139	4463149	+	1	423	NA	NA	203362	550	+	gene	pRL27	TagModule_0214	SO4283		1477	apbE family protein (NCBI ptt file)
78414	20	G11	139	2223946	-	0.9931	578	NA	NA	201276	615	+	gene	pRL27	TagModule_0215	SO2119		2208	response regulator (NCBI ptt file)
78415	20	G12	139	4557454	-	0.9865	294	NA	NA	203440	229	-	gene	pRL27	TagModule_0216	SO4362		3381	conserved hypothetical protein (NCBI ptt file)
78416	20	H01	140	80996	+	0.996	249	NA	NA	203916	474	-	gene	pRL27	TagModule_0205	SOA0100		1574	conserved hypothetical protein (NCBI ptt file)
78417	20	H03	139	1460523	-	0.9948	387	NA	NA	NA	NA		between	pRL27	TagModule_0207			NA
78418	20	H04	139	87495	-	1	266	NA	NA	199272	347	+	gene	pRL27	TagModule_0208	SO0075		1022	AMP-binding family protein (NCBI ptt file)		YES
78419	20	H05	139	3561294	+	0.9325	237	NA	NA	NA	NA		between	pRL27	TagModule_0209			NA
78420	20	H06	139	3678124	+	1	246	NA	NA	202625	38	-	gene	pRL27	TagModule_0210	SO3524	pilE	4968	type IV pilus biogenesis protein PilE (NCBI ptt file)	YES	YES
78421	20	H07	139	2281883	+	1	218	NA	NA	NA	NA		between	pRL27	TagModule_0211			NA
78422	20	H08	139	1732040	+	0.9538	173	NA	NA	200811	160	-	gene	pRL27	TagModule_0212	SO1646		2199	GGDEF family protein (NCBI ptt file)
78423	20	H09	139	100722	+	0.9803	152	NA	NA	199289	237	-	gene	pRL27	TagModule_0213	SO0092	deoD-1	813	purine nucleoside phosphorylase (NCBI ptt file)
78424	20	H10	139	3527729	-	0.9753	479	NA	NA	NA	NA		between	pRL27	TagModule_0214			NA
78425	20	H11	139	2223128	+	0.937	349	NA	NA	201275	90	+	gene	pRL27	TagModule_0215	SO2118		1366	SpoIIAA family protein (NCBI ptt file)
78426	20	H12	139	3788125	+	0.9971	349	NA	NA	NA	NA		between	pRL27	TagModule_0216			NA
78427	21	A01	139	401134	+	1	381	NA	NA	199580	586	-	gene	pRL27	TagModule_0217	SO0387		NA	hypothetical protein (NCBI ptt file)		YES
78428	21	A02	139	4556131	-	0.9676	704	NA	NA	203438	388	-	gene	pRL27	TagModule_0218	SO4360		NA	decaheme cytochrome c (NCBI ptt file)
78429	21	A03	139	503089	+	0.9802	451	NA	NA	199670	451	+	gene	pRL27	TagModule_0219	SO0479		NA	cytochrome c, putative (NCBI ptt file)
78430	21	A05	139	1651275	+	0.991	664	NA	NA	200739	118	-	gene	pRL27	TagModule_0221	SO1572		NA	hypothetical protein (NCBI ptt file)
78431	21	A06	139	4466036	-	0.9972	362	NA	NA	203365	607	-	gene	pRL27	TagModule_0222	SO4286	motB	1360	chemotaxis motB protein (NCBI ptt file)
78432	21	A07	139	1734831	+	0.9932	147	NA	NA	NA	NA		between	pRL27	TagModule_0223			NA
78433	21	A08	139	3666809	-	1	498	NA	NA	202614	189	-	gene	pRL27	TagModule_0224	SO3513		644	tryptophan halogenase, putative (NCBI ptt file)
78434	21	A09	139	2679195	-	0.9971	347	NA	NA	201685	1167	-	gene	pRL27	TagModule_0225	SO2545		NA	sensor histidine kinase (NCBI ptt file)
78435	21	A10	139	4453503	-	0.9768	259	NA	NA	203353	508	-	gene	pRL27	TagModule_0226	SO4274		1968	undecaprenol kinase, putative (NCBI ptt file)
78436	21	A11	139	3954752	+	0.9347	428	NA	NA	202890	2441	+	gene	pRL27	TagModule_0227	SO3800		NA	serine protease, subtilase family (NCBI ptt file)		YES
78437	21	A12	139	2678358	-	0.9526	211	NA	NA	201684	2393	+	gene	pRL27	TagModule_0228	SO2544		642	sensor histidine kinase/response regulator (NCBI ptt file)
78438	21	B01	139	4624660	+	0.9843	511	0.9787	376	NA	NA		between	pRL27	TagModule_0217			NA
78439	21	B02	140	41607	+	0.9761	983	NA	NA	203874	753	-	gene	pRL27	TagModule_0218	SOA0050		1566	toxin secretion, membrane fusion protein (NCBI ptt file)
78440	21	B03	139	4535942	+	0.9917	478	NA	NA	203422	1351	-	gene	pRL27	TagModule_0219	SO4344	ilvA	1171	threonine dehydratase (NCBI ptt file)
78441	21	B04	139	1119246	+	0.9818	714	NA	NA	200259	585	-	gene	pRL27	TagModule_0220	SO1077		NA	hypothetical protein (NCBI ptt file)
78442	21	B06	139	672998	-	0.9957	698	NA	NA	199832	292	+	gene	pRL27	TagModule_0222	SO0644		NA	prophage MuSo1, DNA transposition protein, putative (NCBI ptt file)
78443	21	B07	139	1553755	+	0.9478	459	NA	NA	NA	NA		between	pRL27	TagModule_0223			NA
78444	21	B08	139	4453125	-	1	229	NA	NA	NA	NA		between	pRL27	TagModule_0224			NA
78445	21	B09	139	4137788	-	0.9819	664	1	221	NA	NA		between	pRL27	TagModule_0225			NA
78446	21	B10	139	4453649	-	0.9895	191	NA	NA	203353	362	-	gene	pRL27	TagModule_0226	SO4274		1968	undecaprenol kinase, putative (NCBI ptt file)
78447	21	B11	140	63402	-	0.9901	403	0.9851	403	NA	NA		between	pRL27	TagModule_0227			NA
78448	21	B12	139	363474	+	0.9868	826	NA	NA	199550	536	-	gene	pRL27	TagModule_0228	SO0355		1022	AMP-binding protein (NCBI ptt file)	YES
78449	21	C01	139	4214169	-	0.9881	666	NA	NA	203144	707	-	gene	pRL27	TagModule_0217	SO4060	psrC	3301	polysulfide reductase, subunit C (NCBI ptt file)	YES
78450	21	C02	139	2238250	-	1	308	1	70	NA	NA		between	pRL27	TagModule_0218			NA
78451	21	C03	139	333229	-	0.9816	597	NA	NA	199525	508	+	gene	pRL27	TagModule_0219	SO0330		397	conserved hypothetical protein (NCBI ptt file)
78452	21	C06	139	4621119	+	0.9823	735	NA	NA	203506	179	-	gene	pRL27	TagModule_0222	SO4431		NA	conserved domain protein (NCBI ptt file)	YES	YES
78453	21	C07	139	495599	-	0.9467	148	NA	NA	199663	66	+	gene	pRL27	TagModule_0223	SO0471		2070	hypothetical dioxygenase (NCBI ptt file)		YES
78454	21	C08	139	132533	+	0.997	334	NA	NA	199320	379	-	gene	pRL27	TagModule_0224	SO0123		204	acyltransferase family protein (NCBI ptt file)	YES
78455	21	C09	139	494268	+	0.9987	780	NA	NA	370299	145	-	gene	pRL27	TagModule_0225	SO0468.1		NA	hypothetical protein (NCBI ptt file)	YES	YES
78456	21	C10	140	134350	-	1	249	1	248	NA	NA		between	pRL27	TagModule_0226			NA
78457	21	C11	139	4554820	+	0.9725	507	NA	NA	203437	773	-	gene	pRL27	TagModule_0227	SO4359		NA	outer membrane protein, putative (NCBI ptt file)
78458	21	C12	139	2657530	-	0.9923	516	0.9923	516	NA	NA		between	pRL27	TagModule_0228			NA
78459	21	D01	139	4138834	-	0.9919	368	NA	NA	203086	4918	-	gene	pRL27	TagModule_0217	SO4002		642	sensory transduction histidine kinase (NCBI ptt file)
78460	21	D02	139	2802929	-	0.9961	505	NA	NA	201817	964	+	gene	pRL27	TagModule_0218	SO2679		4373	prophage MuSo2, portal protein, putative (NCBI ptt file)
78461	21	D03	139	725028	-	1	193	NA	NA	NA	NA		between	pRL27	TagModule_0219			NA
78462	21	D04	139	4551823	-	0.9938	480	NA	NA	203436	1781	-	gene	pRL27	TagModule_0220	SO4358	dmaA-2	243	anaerobic dimethyl sulfoxide reductase, A subunit (NCBI ptt file)
78463	21	D05	140	44804	-	0.9867	447	NA	NA	NA	NA		between	pRL27	TagModule_0221			NA
78464	21	D07	139	4247478	-	0.9923	906	NA	NA	203176	725	-	gene	pRL27	TagModule_0223	SO4092		388	hydrolase, carbon-nitrogen family (NCBI ptt file)
78465	21	D08	139	3454682	-	1	446	NA	NA	202413	509	-	gene	pRL27	TagModule_0224	SO3305		2197	DNA-binding response regulator, LuxR family (NCBI ptt file)
78466	21	D09	139	4016554	-	0.9825	627	NA	NA	202956	461	-	gene	pRL27	TagModule_0225	SO3870		1495	disulfide bond formation protein (NCBI ptt file)
78467	21	D10	139	2223715	+	0.9944	538	NA	NA	201276	384	+	gene	pRL27	TagModule_0226	SO2119		2208	response regulator (NCBI ptt file)
78468	21	D11	139	495523	+	0.9936	468	NA	NA	NA	NA		between	pRL27	TagModule_0227			NA
78469	21	D12	139	4466073	+	0.9772	571	NA	NA	203365	570	-	gene	pRL27	TagModule_0228	SO4286	motB	1360	chemotaxis motB protein (NCBI ptt file)
78470	21	E01	139	1577186	+	0.9873	312	NA	NA	NA	NA		between	pRL27	TagModule_0217			NA
78471	21	E02	139	1342646	+	0.9631	754	NA	NA	200469	40	+	gene	pRL27	TagModule_0218	SO1292	folK-2	801	2-amino-4-hydroxy-6-hydroxymethyldihydropteridine pyrophosphokinase (NCBI ptt file)
78472	21	E03	139	2497318	+	0.9667	826	NA	NA	201537	132	+	gene	pRL27	TagModule_0219	SO2393		NA	hypothetical protein (NCBI ptt file)	YES	YES
78473	21	E04	139	1368509	-	0.9929	703	NA	NA	200487	1222	+	gene	pRL27	TagModule_0220	SO1312		823	TolB domain protein (NCBI ptt file)		YES
78474	21	E05	139	935001	-	0.9983	586	NA	NA	200093	234	-	gene	pRL27	TagModule_0221	SO0908		NA	conserved domain protein (NCBI ptt file)		YES
78475	21	E06	139	847187	-	0.9742	153	NA	NA	200014	697	-	gene	pRL27	TagModule_0222	SO0828		2813	conserved hypothetical protein (NCBI ptt file)
78476	21	E07	139	3330391	+	1	315	NA	NA	202301	206	-	gene	pRL27	TagModule_0223	SO3191		3765	chain length determinant protein (NCBI ptt file)	YES
78477	21	E08	139	4328704	-	0.9914	695	NA	NA	203236	208	-	gene	pRL27	TagModule_0224	SO4153		1902	N-ethylmaleimide reductase, putative (NCBI ptt file)		YES
78478	21	E09	139	4038472	-	0.9937	475	NA	NA	NA	NA		between	pRL27	TagModule_0225			NA
78479	21	E10	139	4631906	+	1	436	NA	NA	203518	734	+	gene	pRL27	TagModule_0226	SO4443		NA	hypothetical protein (NCBI ptt file)	YES	YES
78480	21	E11	139	4498841	+	0.9949	584	0.9915	584	NA	NA		between	pRL27	TagModule_0227			NA
78481	21	E12	139	4445680	+	0.9966	591	NA	NA	203348	2160	-	gene	pRL27	TagModule_0228	SO4267	hsdR-2	4096	type I restriction-modification system, R subunit (NCBI ptt file)
78482	21	F01	140	51567	-	0.9828	173	NA	NA	NA	NA		between	pRL27	TagModule_0217			NA
78483	21	F02	139	2999788	-	0.9787	647	NA	NA	202005	247	+	gene	pRL27	TagModule_0218	SO2879	uraA	2233	uracil permease (NCBI ptt file)
78484	21	F03	139	3823548	+	0.9553	313	NA	NA	202764	71	-	gene	pRL27	TagModule_0219	SO3669	hugA	4771	heme transport protein (NCBI ptt file)
78485	21	F04	139	1051454	+	0.9822	561	NA	NA	200197	183	-	gene	pRL27	TagModule_0220	SO1014	nuoI	1143	NADH dehydrogenase I, I subunit (NCBI ptt file)	YES
78486	21	F05	139	4613102	+	1	694	NA	NA	370287	61	+	gene	pRL27	TagModule_0221	SO4423.1		NA	hypothetical ferric aerobactin receptor (NCBI ptt file)	YES
78487	21	F06	139	3667380	+	0.9726	548	NA	NA	202615	2339	-	gene	pRL27	TagModule_0222	SO3514		1629	hypothetical TonB-dependent receptor (NCBI ptt file)
78488	21	F07	139	3477642	-	0.9916	942	NA	NA	NA	NA		between	pRL27	TagModule_0223			NA
78489	21	F08	139	100750	-	0.9768	388	NA	NA	199289	209	-	gene	pRL27	TagModule_0224	SO0092	deoD-1	813	purine nucleoside phosphorylase (NCBI ptt file)
78490	21	F09	140	20599	-	0.9469	358	NA	NA	203850	83	-	gene	pRL27	TagModule_0225	SO_A0025		2801	ISSod1, transposase OrfA (NCBI)
78491	21	F10	140	88358	+	0.9937	316	NA	NA	NA	NA		between	pRL27	TagModule_0226			NA
78492	21	F11	139	3674525	+	0.9938	808	NA	NA	NA	NA		between	pRL27	TagModule_0227			NA
78493	21	F12	139	3470579	+	0.977	649	NA	NA	202425	1234	+	gene	pRL27	TagModule_0228	SO3317		737	5'-nucleotidase, putative (NCBI ptt file)		YES
78494	21	G01	139	4570382	-	0.9857	138	NA	NA	203454	459	+	gene	pRL27	TagModule_0217	SO4376		NA	hypothetical protein (NCBI ptt file)
78495	21	G02	139	4877316	-	1	349	NA	NA	203747	768	+	gene	pRL27	TagModule_0218	SO4678		859	heptosyl transferase, glycosyltransferase family 9 protein (NCBI ptt file)	YES	YES
78496	21	G03	140	116205	-	0.9825	56	NA	NA	203938	313	-	gene	pRL27	TagModule_0219	SO_A0131		NA	hypothetical protein (NCBI)
78497	21	G04	139	1124611	+	0.9935	761	NA	NA	NA	NA		between	pRL27	TagModule_0220			NA
78498	21	G05	139	2238384	-	1	174	NA	NA	201289	83	+	gene	pRL27	TagModule_0221	SO2132		NA	hypothetical protein (NCBI ptt file)
78499	21	G06	139	1113290	-	0.9759	81	NA	NA	200254	587	+	gene	pRL27	TagModule_0222	SO1072		3397	chitin-binding protein, putative (NCBI ptt file)
78500	21	G07	139	1362896	-	0.9958	709	NA	NA	200484	2907	+	gene	pRL27	TagModule_0223	SO1309		NA	hypothetical TonB-dependent receptor (NCBI ptt file)
78501	21	G08	139	155576	-	0.9841	63	NA	NA	NA	NA		between	pRL27	TagModule_0224			NA
78502	21	G09	140	20599	-	0.9603	378	NA	NA	203850	83	-	gene	pRL27	TagModule_0225	SO_A0025		2801	ISSod1, transposase OrfA (NCBI)
78503	21	G10	139	4455966	+	0.9971	348	NA	NA	NA	NA		between	pRL27	TagModule_0226			NA
78504	21	G11	139	3741937	+	1	599	NA	NA	202675	353	+	gene	pRL27	TagModule_0227	SO3576		NA	conserved hypothetical protein (NCBI ptt file)	YES
78505	21	G12	139	494401	-	0.998	488	NA	NA	370299	12	-	gene	pRL27	TagModule_0228	SO0468.1		NA	hypothetical protein (NCBI ptt file)
78506	21	H01	139	1122381	+	0.9888	268	NA	NA	200263	548	-	gene	pRL27	TagModule_0217	SO1081		NA	hypothetical protein (NCBI ptt file)
78507	21	H02	140	148167	-	0.9757	534	NA	NA	203964	730	-	gene	pRL27	TagModule_0218	SOA0160		627	esterase, putative (NCBI ptt file)
78508	21	H03	139	4551615	-	1	304	NA	NA	203436	1989	-	gene	pRL27	TagModule_0219	SO4358	dmaA-2	243	anaerobic dimethyl sulfoxide reductase, A subunit (NCBI ptt file)
78509	21	H04	140	27631	+	0.9843	752	NA	NA	NA	NA		between	pRL27	TagModule_0220			NA
78510	21	H05	139	4447375	+	0.9903	103	NA	NA	203348	465	-	gene	pRL27	TagModule_0221	SO4267	hsdR-2	4096	type I restriction-modification system, R subunit (NCBI ptt file)
78511	21	H06	139	1062503	+	0.9937	473	0.993	429	NA	NA		between	pRL27	TagModule_0222			NA
78512	21	H07	139	3679571	+	0.9957	466	NA	NA	202626	2108	-	gene	pRL27	TagModule_0223	SO3525		3419	type IV pilin biogenesis protein, putative (NCBI ptt file)
78513	21	H08	140	136520	-	0.9712	624	NA	NA	NA	NA		between	pRL27	TagModule_0224			NA
78514	21	H09	139	125853	-	0.9949	776	NA	NA	199312	528	+	gene	pRL27	TagModule_0225	SO0115		NA	hypothetical protein (NCBI ptt file)
78515	21	H10	139	4556684	+	0.9902	508	NA	NA	203439	352	-	gene	pRL27	TagModule_0226	SO4361		NA	hypothetical protein (NCBI ptt file)
78516	21	H11	139	3628727	-	0.9984	612	NA	NA	202583	1127	+	gene	pRL27	TagModule_0227	SO3480		NA	hypothetical protein phosphatase (NCBI ptt file)
78517	21	H12	139	3950806	-	0.9882	168	NA	NA	NA	NA		between	pRL27	TagModule_0228			NA
78518	22	A01	139	3841191	+	0.9641	221	NA	NA	202785	626	-	gene	pRL27	TagModule_0229	SO3690		NA	ABC transporter, permease protein (NCBI ptt file)		YES
78519	22	A02	139	4463149	+	0.9977	431	NA	NA	203362	550	+	gene	pRL27	TagModule_0230	SO4283		1477	apbE family protein (NCBI ptt file)
78520	22	A03	140	63805	-	0.9914	698	0.9871	698	NA	NA		between	pRL27	TagModule_0231			NA
78521	22	A04	139	4906250	+	0.9918	362	NA	NA	203773	274	+	gene	pRL27	TagModule_0232	SO4704		NA	hypothetical protein (NCBI ptt file)	YES
78522	22	A05	139	157168	-	1	574	NA	NA	NA	NA		between	pRL27	TagModule_0233			NA
78523	22	A06	139	311741	-	1	286	NA	NA	199501	946	-	gene	pRL27	TagModule_0234	SO0306		NA	hypothetical protein (NCBI ptt file)
78524	22	A07	139	1504790	-	1	52	NA	NA	NA	NA		between	pRL27	TagModule_0235			NA
78525	22	A08	139	3637853	+	1	365	NA	NA	NA	NA		between	pRL27	TagModule_0236			NA
78526	22	A09	139	4053254	-	0.9688	545	NA	NA	202990	387	-	gene	pRL27	TagModule_0237	SO3905		NA	conserved hypothetical protein (NCBI ptt file)
78527	22	A10	139	4199234	+	0.9779	588	NA	NA	203129	214	+	gene	pRL27	TagModule_0238	SO4045		NA	hypothetical protein (NCBI ptt file)
78528	22	A11	139	401147	-	0.9751	523	NA	NA	199580	573	-	gene	pRL27	TagModule_0239	SO0387		NA	hypothetical protein (NCBI ptt file)
78529	22	A12	139	4131592	-	0.9596	421	NA	NA	203077	700	-	gene	pRL27	TagModule_0240	SO3993		NA	hypothetical protein (NCBI ptt file)
78530	22	B01	139	1014614	+	0.9615	467	NA	NA	200170	815	+	gene	pRL27	TagModule_0229	SO0986		2059	chromate transporter, putative (NCBI ptt file)	YES
78531	22	B02	139	3848011	-	0.9847	588	NA	NA	202790	785	+	gene	pRL27	TagModule_0230	SO3696		NA	hypothetical protein (NCBI ptt file)
78532	22	B03	139	3753053	+	0.9766	513	NA	NA	202684	69	+	gene	pRL27	TagModule_0231	SO3587		NA	hypothetical protein (NCBI ptt file)
78533	22	B04	139	4130736	-	0.9813	427	NA	NA	NA	NA		between	pRL27	TagModule_0232			NA
78534	22	B05	139	925615	+	0.9947	570	NA	NA	200082	806	+	gene	pRL27	TagModule_0233	SO0897	dbpA	513	ATP-dependent RNA helicase DbpA (NCBI ptt file)
78535	22	B06	139	1445782	-	0.9789	284	NA	NA	200563	590	-	gene	pRL27	TagModule_0234	SO1388		6	aminopeptidase P, putative (NCBI ptt file)	YES	YES
78536	22	B07	139	1482892	-	0.9929	418	NA	NA	200599	187	+	gene	pRL27	TagModule_0235	SO1424		NA	hypothetical protein (NCBI ptt file)
78537	22	B08	140	69253	-	0.9798	245	0.9798	245	NA	NA		between	pRL27	TagModule_0236			NA
78538	22	B09	139	135167	+	0.9929	563	NA	NA	199324	721	-	gene	pRL27	TagModule_0237	SO0127		NA	hypothetical protein (NCBI ptt file)
78539	22	B10	139	4463142	-	0.9917	358	NA	NA	203362	543	+	gene	pRL27	TagModule_0238	SO4283		1477	apbE family protein (NCBI ptt file)
78540	22	B11	139	4272907	+	0.9792	623	NA	NA	203198	558	-	gene	pRL27	TagModule_0239	SO4114	mshJ	NA	MSHA biogenesis protein MshJ (NCBI ptt file)
78541	22	B12	139	2727184	-	1	467	NA	NA	201734	1113	-	gene	pRL27	TagModule_0240	SO2594		1033	conserved hypothetical protein (NCBI ptt file)
78542	22	C01	140	150544	-	0.9735	815	NA	NA	203966	586	-	gene	pRL27	TagModule_0229	SOA0162		3293	ISSod6, transposase (NCBI ptt file)
78543	22	C02	140	87499	+	0.9935	612	NA	NA	NA	NA		between	pRL27	TagModule_0230			NA
78544	22	C03	140	26153	+	0.9848	394	NA	NA	203859	1176	-	gene	pRL27	TagModule_0231	SOA0035		3328	ISSod4, transposase (NCBI ptt file)
78545	22	C04	139	1117189	-	0.9764	634	NA	NA	200257	1038	+	gene	pRL27	TagModule_0232	SO1075		NA	conserved hypothetical protein (NCBI ptt file)		YES
78546	22	C05	139	465059	+	0.9717	212	NA	NA	199632	3192	-	gene	pRL27	TagModule_0233	SO0440		NA	conserved hypothetical protein (NCBI ptt file)
78547	22	C06	139	4556848	+	1	385	NA	NA	203439	188	-	gene	pRL27	TagModule_0234	SO4361		NA	hypothetical protein (NCBI ptt file)
78548	22	C07	140	35295	-	0.9988	811	NA	NA	NA	NA		between	pRL27	TagModule_0235			NA
78549	22	C08	139	4557454	-	1	73	NA	NA	203440	229	-	gene	pRL27	TagModule_0236	SO4362		3381	conserved hypothetical protein (NCBI ptt file)
78550	22	C09	139	2146973	+	0.9836	548	NA	NA	201204	1866	+	gene	pRL27	TagModule_0237	SO2047		1505	prolyl oligopeptidase family protein (NCBI ptt file)
78551	22	C10	139	4933485	+	1	508	NA	NA	203798	80	+	gene	pRL27	TagModule_0238	SO4729		NA	conserved hypothetical protein (NCBI ptt file)
78552	22	C11	139	3716924	-	0.9954	438	NA	NA	202659	50	-	gene	pRL27	TagModule_0239	SO3558		NA	hypothetical protein (NCBI ptt file)		YES
78553	22	C12	139	2643155	-	0.949	621	NA	NA	201658	107	+	gene	pRL27	TagModule_0240	SO2517		NA	hypothetical protein (NCBI ptt file)		YES
78554	22	D01	139	2814129	-	0.9088	307	NA	NA	NA	NA		between	pRL27	TagModule_0229			NA
78555	22	D02	139	4022302	-	0.9805	409	NA	NA	NA	NA		between	pRL27	TagModule_0230			NA
78556	22	D03	139	69364	-	0.9803	603	NA	NA	199259	159	+	gene	pRL27	TagModule_0231	SO0062		NA	hypothetical protein (NCBI ptt file)		YES
78557	22	D04	140	63130	-	0.9969	653	NA	NA	NA	NA		between	pRL27	TagModule_0232			NA
78558	22	D05	140	64193	-	0.9837	305	0.9772	305	NA	NA		between	pRL27	TagModule_0233			NA
78559	22	D06	139	2120100	-	1	512	NA	NA	201180	676	+	gene	pRL27	TagModule_0234	SO2020	gsk	524	inosine-guanosine kinase (NCBI ptt file)
78560	22	D07	139	3616891	+	0.9589	509	NA	NA	202574	393	-	gene	pRL27	TagModule_0235	SO3471	glyA	112	serine hydroxymethyltransferase (NCBI ptt file)		YES
78561	22	D08	139	4031074	-	0.9694	588	NA	NA	202969	437	+	gene	pRL27	TagModule_0236	SO3884		4974	site-specific recombinase, phage integrase family (NCBI ptt file)	YES
78562	22	D09	139	1133317	-	0.9726	933	NA	NA	NA	NA		between	pRL27	TagModule_0237			NA
78563	22	D10	139	844370	+	1	49	NA	NA	200013	1436	-	gene	pRL27	TagModule_0238	SO0827	lldP	1620	L-lactate permease (NCBI ptt file)
78564	22	D11	139	937966	-	0.9879	494	NA	NA	NA	NA		between	pRL27	TagModule_0239			NA
78565	22	D12	139	4555960	-	0.9665	829	NA	NA	203438	559	-	gene	pRL27	TagModule_0240	SO4360		NA	decaheme cytochrome c (NCBI ptt file)
78566	22	E01	139	1505636	+	0.9755	366	NA	NA	200614	699	+	gene	pRL27	TagModule_0229	SO1442		NA	conserved hypothetical protein (NCBI ptt file)
78567	22	E02	139	678412	+	0.9938	806	NA	NA	199842	478	+	gene	pRL27	TagModule_0230	SO0654		NA	hypothetical protein (NCBI ptt file)
78568	22	E03	139	4132843	-	0.9637	386	NA	NA	203078	450	-	gene	pRL27	TagModule_0231	SO3994		NA	hypothetical protein (NCBI ptt file)
78569	22	E04	139	2238430	-	1	128	NA	NA	201289	129	+	gene	pRL27	TagModule_0232	SO2132		NA	hypothetical protein (NCBI ptt file)
78570	22	E05	139	4646567	+	0.9472	434	NA	NA	NA	NA		between	pRL27	TagModule_0233			NA
78571	22	E07	139	481828	-	0.9568	667	NA	NA	199647	509	-	gene	pRL27	TagModule_0235	SO0455		4666	hypothetical transporter (NCBI ptt file)
78572	22	E08	139	3408060	+	0.9955	668	NA	NA	202377	1067	+	gene	pRL27	TagModule_0236	SO3269		1861	cytidylyltransferase domain protein (NCBI ptt file)		YES
78573	22	E09	139	3308684	+	0.9767	969	NA	NA	202281	876	-	gene	pRL27	TagModule_0237	SO3171		1086	polysaccharide biosynthesis protein (NCBI ptt file)	YES	YES
78574	22	E10	139	399497	+	0.9665	507	NA	NA	NA	NA		between	pRL27	TagModule_0238			NA
78575	22	E11	139	1644068	+	0.9936	777	NA	NA	200733	455	+	gene	pRL27	TagModule_0239	SO1566		NA	acetyltransferase, GNAT family (NCBI ptt file)	YES
78576	22	E12	139	686179	-	1	696	NA	NA	199855	1000	+	gene	pRL27	TagModule_0240	SO0667		4383	conserved hypothetical protein (NCBI ptt file)	YES
78577	22	F01	139	4631499	+	0.9787	751	NA	NA	203518	327	+	gene	pRL27	TagModule_0229	SO4443		NA	hypothetical protein (NCBI ptt file)
78578	22	F02	139	3858403	+	1	444	NA	NA	202805	735	-	gene	pRL27	TagModule_0230	SO3711		3673	conserved hypothetical protein (NCBI ptt file)	YES	YES
78579	22	F03	139	4704625	+	0.9381	95	NA	NA	203585	626	+	gene	pRL27	TagModule_0231	SO4511		2864	formate dehydrogenase, C subunit, putative (NCBI ptt file)
78580	22	F04	140	133802	-	0.9937	158	0.9937	158	NA	NA		between	pRL27	TagModule_0232			NA
78581	22	F05	139	4908462	-	0.9808	718	NA	NA	203774	198	-	gene	pRL27	TagModule_0233	SO4705		NA	transcriptional regulator, putative (NCBI ptt file)
78582	22	F06	139	700470	+	1	92	NA	NA	199868	3849	+	gene	pRL27	TagModule_0234	SO0680		NA	hypothetical protein (NCBI ptt file)
78583	22	F07	139	1769834	+	0.9737	711	NA	NA	200847	444	+	gene	pRL27	TagModule_0235	SO1682	mmsB	2084	3-hydroxyisobutyrate dehydrogenase (NCBI ptt file)	YES
78584	22	F08	139	3084845	-	0.9969	321	NA	NA	202069	643	-	gene	pRL27	TagModule_0236	SO2946		NA	hypothetical protein (NCBI ptt file)
78585	22	F09	139	144212	-	0.9615	772	NA	NA	199335	1195	-	gene	pRL27	TagModule_0237	SO0138	moeA	303	molybdopterin biosynthesis MoeA protein (NCBI ptt file)
78586	22	F10	139	2087136	-	0.9952	621	NA	NA	NA	NA		between	pRL27	TagModule_0238			NA
78587	22	F11	140	67081	-	0.9913	687	NA	NA	203905	44	-	gene	pRL27	TagModule_0239	SOA0086		1961	site-specific recombinase, resolvase family (NCBI ptt file)
78588	22	F12	139	4019186	+	0.99	398	NA	NA	202958	1130	+	gene	pRL27	TagModule_0240	SO3872		NA	arylsulfate sulfotransferase (NCBI ptt file)
78589	22	G01	139	4765599	+	0.9948	771	NA	NA	203641	720	-	gene	pRL27	TagModule_0229	SO4571		583	transcriptional regulator, LysR family (NCBI ptt file)
78590	22	G02	139	4079829	+	1	405	NA	NA	203020	2119	-	gene	pRL27	TagModule_0230	SO3935	vacB	557	ribonuclease R (NCBI ptt file)
78591	22	G03	139	4639722	+	0.9727	550	NA	NA	203526	298	-	gene	pRL27	TagModule_0231	SO4451	moaC	315	molybdenum cofactor biosynthesis protein C (NCBI ptt file)	YES
78592	22	G04	139	3453420	-	0.9595	782	NA	NA	202411	953	-	gene	pRL27	TagModule_0232	SO3303		NA	chitinase domain protein (NCBI ptt file)
78593	22	G05	139	1773139	+	0.9795	633	NA	NA	200851	1534	+	gene	pRL27	TagModule_0233	SO1686		1506	prolyl oligopeptidase family protein (NCBI ptt file)	YES	YES
78594	22	G06	139	3442131	-	1	816	NA	NA	202405	239	-	gene	pRL27	TagModule_0234	SO3297		583	transcriptional regulator, LysR family (NCBI ptt file)
78595	22	G07	139	3413722	-	0.9843	569	NA	NA	202381	1593	+	gene	pRL27	TagModule_0235	SO3273		2604	conserved hypothetical protein (NCBI ptt file)
78596	22	G08	139	129352	-	0.988	665	NA	NA	199316	112	+	gene	pRL27	TagModule_0236	SO0119		NA	conserved hypothetical protein (NCBI ptt file)
78597	22	G09	139	3414528	+	1	405	NA	NA	202381	2399	+	gene	pRL27	TagModule_0237	SO3273		2604	conserved hypothetical protein (NCBI ptt file)
78598	22	G10	139	3552340	-	0.9907	746	NA	NA	NA	NA		between	pRL27	TagModule_0238			NA
78599	22	G11	140	36132	+	0.9963	817	NA	NA	203872	1712	-	gene	pRL27	TagModule_0239	SOA0048		1506	prolyl oligopeptidase family protein (NCBI ptt file)
78600	22	G12	139	3356032	+	0.9912	226	NA	NA	202324	710	-	gene	pRL27	TagModule_0240	SO3215	flhB	1377	flagellar biosynthetic protein FlhB (NCBI ptt file)
78601	22	H02	139	3412904	-	0.9964	280	NA	NA	202381	775	+	gene	pRL27	TagModule_0230	SO3273		2604	conserved hypothetical protein (NCBI ptt file)
78602	22	H03	139	1272824	+	0.9706	236	NA	NA	200403	1226	-	gene	pRL27	TagModule_0231	SO1225		NA	conserved hypothetical protein (NCBI ptt file)
78603	22	H04	139	3443424	-	0.994	660	NA	NA	202406	192	-	gene	pRL27	TagModule_0232	SO3298		NA	conserved hypothetical protein (NCBI ptt file)
78604	22	H05	140	35311	+	0.9902	712	NA	NA	NA	NA		between	pRL27	TagModule_0233			NA
78605	22	H07	139	4042879	+	0.9952	623	NA	NA	202981	824	+	gene	pRL27	TagModule_0235	SO3896		3203	outer membrane porin, putative (NCBI ptt file)
78606	22	H08	139	1003250	-	0.9052	114	NA	NA	200154	74	-	gene	pRL27	TagModule_0236	SO0970		1053	fumarate reductase flavoprotein subunit precursor (NCBI ptt file)
78607	22	H09	139	4059178	-	0.9928	693	NA	NA	202999	1907	-	gene	pRL27	TagModule_0237	SO3914		4774	TonB-dependent receptor, putative (NCBI ptt file)
78608	22	H10	139	2402956	+	1	116	NA	NA	201438	368	-	gene	pRL27	TagModule_0238	SO2288		625	glutathione-S-transferase domain protein (NCBI ptt file)	YES	YES
78609	22	H11	139	2055764	+	0.9525	546	NA	NA	NA	NA		between	pRL27	TagModule_0239			NA
78610	22	H12	139	1512123	+	0.9949	393	NA	NA	200627	337	-	gene	pRL27	TagModule_0240	SO1455		2003	DNA repair protein, RadC family (NCBI ptt file)
78611	23	A01	140	41892	+	0.9835	423	NA	NA	203874	468	-	gene	pRL27	TagModule_0241	SOA0050		1566	toxin secretion, membrane fusion protein (NCBI ptt file)
78612	23	A02	139	845956	+	1	670	NA	NA	NA	NA		between	pRL27	TagModule_0242			NA
78613	23	A03	139	4162596	+	0.9719	498	NA	NA	203100	410	-	gene	pRL27	TagModule_0243	SO4016		NA	conserved hypothetical protein (NCBI ptt file)
78614	23	A04	139	1094773	+	1	272	NA	NA	200237	1283	+	gene	pRL27	TagModule_0244	SO1055		2199	sensory box protein (NCBI ptt file)
78615	23	A05	139	1476214	-	0.9704	304	NA	NA	200593	668	-	gene	pRL27	TagModule_0245	SO1418		1477	apbE family protein (NCBI ptt file)
78616	23	A06	139	4532686	+	0.9783	507	NA	NA	203419	68	+	gene	pRL27	TagModule_0246	SO4341		NA	hypothetical protein (NCBI ptt file)
78617	23	A08	140	44051	-	0.9797	246	NA	NA	203875	329	+	gene	pRL27	TagModule_0248	SOA0051		NA	hypothetical protein (NCBI ptt file)	YES	YES
78618	23	A09	139	4556839	-	0.9802	252	NA	NA	203439	197	-	gene	pRL27	TagModule_0249	SO4361		NA	hypothetical protein (NCBI ptt file)
78619	23	A10	139	942767	-	0.9274	440	NA	NA	200099	1439	-	gene	pRL27	TagModule_0250	SO0915		NA	ankyrin domain protein (NCBI ptt file)
78620	23	A11	139	1783485	+	0.977	477	NA	NA	200860	708	-	gene	pRL27	TagModule_0251	SO1695		NA	sensory box/GGDEF family protein (NCBI ptt file)	YES
78621	23	A12	139	4943876	-	0.9832	595	0.9832	595	NA	NA		between	pRL27	TagModule_0252			NA
78622	23	B01	139	4555238	+	1	317	NA	NA	203437	355	-	gene	pRL27	TagModule_0241	SO4359		NA	outer membrane protein, putative (NCBI ptt file)
78623	23	B03	139	1537511	+	0.9588	291	NA	NA	200642	362	-	gene	pRL27	TagModule_0243	SO1471		582	site-specific recombinase, phage integrase family (NCBI ptt file)
78624	23	B04	139	3134186	-	0.9669	302	NA	NA	202144	849	+	gene	pRL27	TagModule_0244	SO3022	trpC/F	134	indole-3-glycerol phosphate synthase/phosphoribosylanthranilate isomerase (NCBI ptt file)		YES
78625	23	B05	139	745940	+	0.9657	202	NA	NA	199918	104	-	gene	pRL27	TagModule_0245	SO0730		NA	hypothetical protein (NCBI ptt file)
78626	23	B07	139	486970	+	0.9812	585	NA	NA	199654	413	+	gene	pRL27	TagModule_0247	SO0462		NA	hypothetical protein (NCBI ptt file)	YES	YES
78627	23	B08	140	18423	+	0.9772	905	0.9372	239	NA	NA		between	pRL27	TagModule_0248			NA
78628	23	B09	139	1496789	-	0.972	911	NA	NA	200609	571	-	gene	pRL27	TagModule_0249	SO1434		840	methyl-accepting chemotaxis protein (NCBI ptt file)
78629	23	B10	139	2943350	-	0.975	939	NA	NA	201949	892	+	gene	pRL27	TagModule_0250	SO2822		3275	sensor histidine kinase (NCBI ptt file)
78630	23	B11	139	4335060	+	0.9905	629	NA	NA	203243	1161	+	gene	pRL27	TagModule_0251	SO4160		NA	flagellar biosynthesis protein, putative (NCBI ptt file)
78631	23	B12	139	111079	-	0.9808	520	NA	NA	199298	2376	+	gene	pRL27	TagModule_0252	SO0101	fdnG	243	selenium-containing formate dehydrogenase, nitrate inducible, alpha subunit (NCBI ptt file)
78632	23	C01	139	3788125	+	0.9556	405	NA	NA	NA	NA		between	pRL27	TagModule_0241			NA
78633	23	C02	139	3666450	+	0.9924	396	NA	NA	202614	548	-	gene	pRL27	TagModule_0242	SO3513		644	tryptophan halogenase, putative (NCBI ptt file)	YES	YES
78634	23	C03	139	1110589	-	0.9797	590	NA	NA	200252	608	+	gene	pRL27	TagModule_0243	SO1070	katB	753	catalase (NCBI ptt file)		YES
78635	23	C04	139	2053300	+	0.9794	721	NA	NA	201110	1284	+	gene	pRL27	TagModule_0244	SO1949		NA	invasin domain protein (NCBI ptt file)
78636	23	C05	139	4020429	+	0.9893	928	NA	NA	202959	529	+	gene	pRL27	TagModule_0245	SO3873		NA	hypothetical protein (NCBI ptt file)
78637	23	C06	139	4372385	+	0.9785	602	NA	NA	203288	477	+	gene	pRL27	TagModule_0246	SO4206		84	hydrolase, TatD family (NCBI ptt file)	YES	YES
78638	23	C07	139	501949	-	0.9871	619	NA	NA	199669	179	-	gene	pRL27	TagModule_0247	SO0478	ccmF-2	1138	cytochrome c-type biogenesis protein CcmF (NCBI ptt file)
78639	23	C08	139	3485766	-	0.9975	801	NA	NA	202446	924	-	gene	pRL27	TagModule_0248	SO3338	ybjU	2008	L-allo-threonine aldolase (NCBI ptt file)
78640	23	C09	139	3726755	-	0.9688	63	NA	NA	202665	131	-	gene	pRL27	TagModule_0249	SO3564	dcp-2	339	peptidyl-dipeptidase Dcp (NCBI ptt file)
78641	23	C10	139	125030	+	0.9926	804	NA	NA	NA	NA		between	pRL27	TagModule_0250			NA
78642	23	C11	139	1177388	+	1	241	NA	NA	200316	40	+	gene	pRL27	TagModule_0251	SO1136		513	ATP-dependent RNA helicase, DEAD box family (NCBI ptt file)		YES
78643	23	C12	139	4817739	-	0.9397	671	NA	NA	203691	20	-	gene	pRL27	TagModule_0252	SO4621		NA	hypothetical protein (NCBI ptt file)
78644	23	D01	139	4017155	+	0.9329	445	NA	NA	202957	483	-	gene	pRL27	TagModule_0241	SO3871		NA	thiol:disulfide interchange protein, DsbA family (NCBI ptt file)
78645	23	D02	139	848104	-	0.9901	403	NA	NA	200016	1359	-	gene	pRL27	TagModule_0242	SO0830		1785	alkaline phosphatase (NCBI ptt file)
78646	23	D03	139	3100165	+	1	665	NA	NA	202089	110	-	gene	pRL27	TagModule_0243	SO2966		NA	conserved hypothetical protein (NCBI ptt file)	YES
78647	23	D04	139	4557463	+	0.996	501	NA	NA	203440	220	-	gene	pRL27	TagModule_0244	SO4362		3381	conserved hypothetical protein (NCBI ptt file)
78648	23	D05	140	30639	-	0.9942	519	NA	NA	203863	1065	+	gene	pRL27	TagModule_0245	SO_A0039		NA	hypothetical protein (NCBI)
78649	23	D07	140	134528	-	0.9977	426	NA	NA	NA	NA		between	pRL27	TagModule_0247			NA
78650	23	D08	139	1691483	-	0.9363	204	NA	NA	NA	NA		between	pRL27	TagModule_0248			NA
78651	23	D09	139	4937236	+	0.948	346	NA	NA	203801	462	+	gene	pRL27	TagModule_0249	SO4732		4805	conserved hypothetical protein (NCBI ptt file)	YES	YES
78652	23	D11	139	4791231	+	0.9808	829	NA	NA	203668	1442	+	gene	pRL27	TagModule_0251	SO4598		3696	heavy metal efflux pump, CzcA family (NCBI ptt file)
78653	23	D12	139	3319355	-	0.9754	761	NA	NA	202290	514	-	gene	pRL27	TagModule_0252	SO3180		463	glycosyl transferase, group 2 family protein (NCBI ptt file)
78654	23	E01	139	2061520	-	0.9819	554	NA	NA	201115	148	-	gene	pRL27	TagModule_0241	SO1954		1280	transporter, LysE family (NCBI ptt file)
78655	23	E02	139	4463141	-	0.9566	549	NA	NA	203362	542	+	gene	pRL27	TagModule_0242	SO4283		1477	apbE family protein (NCBI ptt file)
[truncated: 22,689 more rows]

## Sheet: ReadMe
strainMutantId	transposon mutant identifier
Plate96	mutant microplate
Plate96_pos	mutant microplate position
Scaffold	whether transposon landed in chromosome (139) or megaplasmid (140)
Location	transposon insertion location
Strand	transposon insertion orientation, + is 5' to 3' while - is 3' to 5'
Identity	percent identity match of transposon sequence trace to genome
HitLength	length of transposon sequence trace into the genome
Identity2	same as IDENTITY if a second high scoring hit to the genome is found
HitLength2	same as HITLENGTH if a second high scoring hit to the genome if found
VimssID	gene identifier used in MicrobesOnline
Offset	the location of the transposon insertion from the start of the gene
Genestrand	whether the targeted gene is on the plus or minus strand
Overlap	whether transposon landed within a single predicted gene (gene), within two predicted overlapping genes (overlap), or in an intergenic region (between)
Transposon	either pRL27 or pMiniHimar_RB (pHIMAR)
TagModule	The TagModule identified in the transposon mutant
SysName	systematic S. oneidensis MR-1 gene name
Name	gene name
COG	clusters of orthologous genes number
Description	gene description
upPool	if mutant strain is in the MR1 upPool
dnPool	if mutant strain is in the MR1 dnPool
