# Supplementary material for: Evidence-Based Annotation of Gene Function in Shewanella oneidensis MR-1 Using Genome-Wide Fitness Profiling across 121 Conditions
Source: PLoS Genet. 2011 Nov 17;7(11):e1002385. doi: 10.1371/journal.pgen.1002385 (PMC3219624; doi:10.1371/journal.pgen.1002385)
Supplement: Table S9 — List of plasmids used in this study. (XLS) [file pgen.1002385.s017.xls]

## Sheet: Sheet1
Plasmids	Description	Source
pBBRMCS5	Broad host-range vector, GentR	Kovach, Elzer et al. 1995
pAPA3003	pBBRMCS5 with 992 bp fragment containing S0_2650	this study
pAPA3013	pBBRMCS5 with 1325 bp fragment containing S0_0887	this study
pAPA3016	pBBRMCS5 with 2718 bp fragment containing S0_3273	this study
pAPA3018	pBBRMCS5 with 861 bp fragment containing S0_3257	this study
pAPA3020	pBBRMCS5 with 636 bp fragment containing S0_1371	this study
pAPA3024	pBBRMCS5 with 894 bp fragment containing S0_1333	this study
pAPA3030	pBBRMCS5 with 999 bp fragment containing S0_1916	this study
pAPA3031	pBBRMCS5 with 875 bp fragment containing S0_1071	this study
pAPA3034	pBBRMCS5 with 706 bp fragment containing S0_4544	this study
pAPA3035	pBBRMCS5 with 1636 bp fragment containing S0_0444	this study
pAPA3037	pBBRMCS5 with 1208 bp fragment containing S0_1670	this study
pAPA3039	pBBRMCS5 with 1120 bp fragment containing S0_4198	this study
pAPA3040	pBBRMCS5 with 630 bp fragment containing S0_4485	this study
pAPA3044	pBBRMCS5 with 2753 bp fragment containing S0_0274	this study
pAPA3050	pBBRMCS5 with 1272 bp fragment containing S0_3749	this study
pAPA3051	pBBRMCS5 with 1292 bp fragment containing E. coli argE	this study
